# Supplementary material for: Development and Validation of a Prognostic Classifier Based on Metabolism-Related Genes for Breast Cancer
Source: Research Square preprint supplement (doi:10.21203/rs.3.rs-1105292/v1), 2021-12-20
Supplement: Supplementary file 1 [file 0134fcefd39079b278eeb749.xlsx]

## Sheet: by cmap name
rank	cmap name	mean	n	enrichment	p	specificity	percent non-null
1	vorinostat	-0.617	12	-0.617	0	0.2566	83
2	trichostatin A	-0.454	182	-0.383	0	0.3762	70
3	tanespimycin	-0.342	62	-0.327	0	0.2689	58
4	amitriptyline	0.671	6	0.807	8e-05	0.0097	100
5	0297417-0002B	-0.804	3	-0.942	0.00028	0.0164	100
6	Prestwick-559	-0.798	3	-0.937	0.00038	0.0061	100
7	scriptaid	-0.806	3	-0.909	0.00134	0.0417	100
8	MG-262	-0.817	3	-0.907	0.00152	0.0787	100
9	meglumine	0.641	4	0.82	0.00183	0	100
10	suramin sodium	0.687	4	0.804	0.00277	0	100
11	alpha-estradiol	-0.488	16	-0.428	0.00349	0.1038	75
12	cloxacillin	0.624	4	0.793	0.00362	0.0068	100
13	Prestwick-1103	0.636	4	0.791	0.00372	0.0186	100
14	fludroxycortide	0.56	5	0.722	0.00378	0	80
15	captopril	0.45	5	0.721	0.00384	0	80
16	thiostrepton	-0.681	4	-0.79	0.00398	0.037	100
17	naftidrofuryl	0.584	4	0.783	0.00412	0	100
18	dydrogesterone	-0.727	4	-0.786	0.00418	0	100
19	aciclovir	0.575	6	0.659	0.00465	0.0124	83
20	econazole	0.489	4	0.771	0.00521	0.0718	75
21	Prestwick-1082	0.659	3	0.853	0.00605	0.0263	100
22	kinetin	0.343	4	0.749	0.0076	0	50
23	vinblastine	0.696	3	0.841	0.00787	0.0387	100
24	withaferin A	-0.7	4	-0.746	0.00826	0.1148	100
25	sulconazole	-0.714	4	-0.742	0.00871	0.0197	100
26	atracurium besilate	0.681	3	0.836	0.00889	0.0173	100
27	rotenone	-0.658	4	-0.74	0.00891	0.0284	100
28	15-delta prostaglandin J2	-0.446	15	-0.404	0.00959	0.2256	66
29	mephenytoin	0.553	4	0.733	0.00991	0.0237	75
30	acenocoumarol	0.4	5	0.669	0.01047	0.013	60
31	guaifenesin	-0.583	6	-0.614	0.01059	0.0258	83
32	(+)-isoprenaline	0.548	4	0.729	0.01076	0.0052	75
33	pheneticillin	0.537	4	0.729	0.01082	0.0315	75
34	guanabenz	0.373	5	0.667	0.01089	0.0769	60
35	fludrocortisone	0.379	8	0.536	0.01119	0.1706	75
36	edrophonium chloride	0.475	5	0.664	0.01131	0	60
37	luteolin	-0.681	4	-0.722	0.01211	0.0571	100
38	myosmine	0.465	6	0.6	0.01317	0.0611	66
39	epivincamine	-0.711	4	-0.715	0.01333	0.0402	100
40	estropipate	0.402	4	0.712	0.01396	0.018	50
41	tinidazole	-0.494	6	-0.602	0.01398	0	66
42	minocycline	0.358	5	0.652	0.01416	0.0128	60
43	cefaclor	0.343	4	0.706	0.01556	0.0139	50
44	flucytosine	-0.716	4	-0.704	0.01585	0.0173	100
45	16,16-dimethylprostaglandin E2	0.624	3	0.801	0.016	0.0419	100
46	orlistat	-0.458	5	-0.636	0.01646	0.0058	80
47	metaraminol	0.334	4	0.7	0.01669	0.0075	50
48	0317956-0000	-0.383	8	-0.507	0.0198	0.0961	50
49	etynodiol	0.596	4	0.682	0.02184	0.0559	75
50	trimethadione	-0.459	4	-0.683	0.02218	0.0238	75
51	fenoterol	0.442	3	0.774	0.02332	0.0315	66
52	naringenin	0.548	4	0.678	0.02349	0.1596	75
53	carbachol	-0.589	4	-0.679	0.02371	0.052	75
54	pralidoxime	0.346	4	0.676	0.02421	0.0567	50
55	pyridoxine	-0.571	4	-0.674	0.02532	0.0809	75
56	0225151-0000	-0.713	3	-0.768	0.02574	0.0233	100
57	hydrastinine	0.356	5	0.611	0.02661	0.028	80
58	W-13	0.778	2	0.886	0.027	0.0245	100
59	mycophenolic acid	0.472	3	0.756	0.02854	0.1709	66
60	danazol	0.358	4	0.664	0.02875	0.0242	75
61	gliclazide	-0.503	4	-0.656	0.03219	0.12	75
62	latamoxef	-0.703	3	-0.744	0.03429	0.0345	100
63	aminocaproic acid	-0.633	3	-0.743	0.03441	0.0408	100
64	tacrine	0.281	4	0.652	0.03445	0.0126	50
65	probucol	0.219	6	0.541	0.03593	0.0067	50
66	thiocolchicoside	-0.521	4	-0.647	0.0367	0.0427	75
67	sulfapyridine	0.338	4	0.648	0.0368	0.0201	50
68	testosterone	0.378	5	0.584	0.03861	0.0382	80
69	nitrofural	-0.347	4	-0.642	0.03945	0.0629	50
70	arachidonyltrifluoromethane	0.721	2	0.858	0.04088	0.0377	100
71	TTNPB	0.653	2	0.857	0.04143	0.0311	100
72	tranylcypromine	-0.407	5	-0.575	0.04147	0.12	80
73	PF-00539745-00	0.447	3	0.72	0.04319	0.0565	66
74	tacrolimus	0.421	3	0.718	0.04425	0.0828	66
75	fenbufen	0.211	6	0.524	0.04666	0.0214	50
76	etiocholanolone	0.369	6	0.522	0.04757	0.3228	66
77	adenosine phosphate	0.353	4	0.628	0.04776	0.0373	75
78	bendroflumethiazide	-0.461	6	-0.523	0.04807	0.0862	66
79	nadide	0.536	4	0.626	0.04882	0.0643	75
80	CP-944629	0.337	4	0.625	0.04933	0.0154	50
81	blebbistatin	-0.717	2	-0.842	0.05012	0.0811	100
82	doxazosin	-0.55	4	-0.623	0.05021	0.1949	75
83	0198306-0000	-0.486	4	-0.623	0.05051	0.1023	75
84	cefalotin	0.34	4	0.623	0.05075	0.0177	50
85	brinzolamide	-0.445	4	-0.62	0.05216	0.0865	75
86	mefexamide	0.341	4	0.619	0.05313	0.0552	75
87	noretynodrel	-0.369	4	-0.616	0.05461	0.0593	75
88	piretanide	0.406	4	0.617	0.05494	0.053	75
89	liothyronine	-0.282	4	-0.615	0.05544	0.1036	50
90	spaglumic acid	0.607	2	0.833	0.05603	0.0952	100
91	harmine	-0.535	4	-0.613	0.05656	0.2486	75
92	zimeldine	-0.557	5	-0.551	0.05701	0.2747	80
93	piperlongumine	-0.717	2	-0.829	0.05791	0.0886	100
94	AG-028671	0.415	3	0.689	0.05939	0.0688	66
95	geldanamycin	-0.272	15	-0.329	0.06161	0.4141	53
96	epitiostanol	0.333	4	0.607	0.06183	0.0133	50
97	meclocycline	0.314	4	0.606	0.06211	0.1	50
98	cetirizine	-0.392	4	-0.605	0.06268	0.2029	75
99	felbinac	0.385	4	0.605	0.06292	0.3801	50
100	ofloxacin	-0.514	5	-0.543	0.06416	0.0925	80
101	omeprazole	-0.563	4	-0.602	0.06565	0.266	75
102	morantel	-0.568	5	-0.54	0.06631	0.3714	80
103	calcium folinate	0.345	5	0.543	0.06685	0.3315	60
104	tridihexethyl	0.4	4	0.599	0.0675	0.0439	75
105	nalidixic acid	-0.387	5	-0.537	0.06919	0.0541	60
106	leflunomide	0.343	4	0.596	0.06951	0.1356	50
107	oxamniquine	0.45	4	0.595	0.07032	0.0244	75
108	dinoprost	-0.336	4	-0.596	0.07054	0.0916	50
109	sulfasalazine	-0.525	5	-0.535	0.07121	0.0383	80
110	pinacidil	0.341	4	0.593	0.07177	0.0153	50
111	solasodine	-0.552	6	-0.493	0.07298	0.0819	83
112	ribavirin	0.292	4	0.592	0.07309	0.1688	50
113	lisuride	0.425	5	0.535	0.07332	0.3947	60
114	demecarium bromide	0.505	4	0.591	0.0736	0.1214	75
115	pargyline	-0.514	4	-0.592	0.07418	0.2	75
116	thioridazine	-0.267	20	-0.277	0.07549	0.5269	50
117	trifluridine	0.316	4	0.586	0.07866	0.2316	50
118	meteneprost	0.361	4	0.583	0.08098	0.2446	50
119	cefapirin	0.481	4	0.58	0.08319	0.0615	75
120	disopyramide	0.288	4	0.578	0.08492	0.1259	50
121	5224221	-0.67	2	-0.791	0.08495	0.2632	100
122	xamoterol	-0.399	3	-0.649	0.08671	0.1575	66
123	thapsigargin	-0.485	3	-0.646	0.08932	0.4129	66
124	metolazone	0.381	5	0.519	0.08946	0.0602	60
125	nimodipine	0.35	4	0.573	0.0895	0.142	75
126	3-nitropropionic acid	-0.539	4	-0.575	0.09002	0.2155	75
127	PHA-00851261E	-0.313	8	-0.417	0.09022	0.1941	62
128	SC-19220	0.469	4	0.572	0.09103	0.0659	75
129	famotidine	0.351	5	0.517	0.092	0.0299	60
130	adiphenine	0.445	5	0.516	0.09294	0.5745	60
131	benzathine benzylpenicillin	0.502	4	0.569	0.09362	0.2686	75
132	ellipticine	-0.441	4	-0.571	0.09397	0.3359	75
133	1,4-chrysenequinone	-0.688	2	-0.777	0.09754	0.1563	100
134	cisapride	-0.544	4	-0.565	0.09952	0.0612	75
135	etilefrine	0.332	4	0.562	0.10126	0.0994	50
136	zuclopenthixol	0.304	4	0.561	0.10197	0.0874	50
137	sulfamethizole	-0.403	4	-0.56	0.10503	0.1243	75
138	calcium pantothenate	0.452	4	0.558	0.10525	0.0992	75
139	glimepiride	-0.365	4	-0.558	0.1076	0.0457	50
140	laudanosine	-0.423	4	-0.556	0.10915	0.0328	75
141	idazoxan	-0.3	4	-0.556	0.10981	0.125	50
142	15(S)-15-methylprostaglandin E2	0.374	4	0.553	0.1107	0.2486	75
143	methoxamine	0.352	4	0.553	0.1107	0.0764	50
144	sparteine	-0.289	4	-0.555	0.11096	0.1098	50
145	rottlerin	-0.459	3	-0.624	0.11119	0.2269	66
146	cinchonidine	-0.41	4	-0.554	0.11236	0.0616	75
147	spironolactone	0.261	5	0.499	0.11481	0.1887	60
148	idoxuridine	0.264	5	0.498	0.11611	0.1677	60
149	mesoridazine	-0.359	4	-0.549	0.11834	0.153	75
150	gallamine triethiodide	-0.422	5	-0.492	0.1213	0.1534	60
151	homosalate	-0.561	4	-0.544	0.12415	0.1333	75
152	diflorasone	-0.541	4	-0.543	0.12537	0.0932	75
153	oxedrine	0.502	4	0.54	0.12562	0.153	75
154	phenindione	-0.409	4	-0.542	0.12584	0.1892	75
155	chlorogenic acid	0.327	4	0.54	0.12588	0.2099	75
156	diperodon	-0.479	3	-0.61	0.12777	0.0698	66
157	primaquine	-0.437	4	-0.541	0.12777	0.1111	75
158	salsolidin	-0.539	4	-0.541	0.12801	0.1623	75
159	procainamide	-0.329	4	-0.54	0.1292	0.1244	75
160	lanatoside C	-0.406	6	-0.447	0.12953	0.2766	66
161	esculetin	0.461	3	0.609	0.13018	0.1795	66
162	PF-01378883-00	-0.482	4	-0.536	0.1342	0.0809	75
163	chlormezanone	0.326	4	0.533	0.13557	0.1138	50
164	pyrantel	0.152	5	0.483	0.1356	0.063	60
165	progesterone	-0.328	4	-0.535	0.13571	0.1477	75
166	Prestwick-860	-0.43	4	-0.534	0.13603	0.3757	75
167	probenecid	0.336	4	0.532	0.13611	0.0533	75
168	cotinine	-0.459	6	-0.443	0.1372	0.25	66
169	moracizine	0.368	4	0.53	0.13875	0.1367	50
170	viomycin	0.331	4	0.53	0.13897	0.6069	50
171	conessine	0.133	4	0.529	0.14019	0.0308	50
172	clioquinol	-0.405	5	-0.479	0.1402	0.157	60
173	suxibuzone	0.146	4	0.528	0.14158	0.0949	50
174	clofibrate	-0.624	2	-0.732	0.14289	0.0544	100
175	5707885	-0.397	4	-0.529	0.14345	0.2017	75
176	papaverine	-0.353	4	-0.528	0.14418	0.1384	50
177	Prestwick-674	-0.331	6	-0.439	0.14419	0.3554	50
178	etidronic acid	-0.281	4	-0.525	0.14802	0.2289	50
179	ricinine	-0.537	4	-0.525	0.14802	0.1325	75
180	lysergol	-0.271	4	-0.525	0.14832	0.129	50
181	lincomycin	0.341	3	0.596	0.14837	0.1102	66
182	emetine	-0.325	4	-0.523	0.1519	0.5941	50
183	bromopride	0.186	6	0.433	0.15212	0.1479	50
184	dacarbazine	-0.524	4	-0.52	0.15592	0.2746	75
185	cyclopenthiazide	0.333	4	0.517	0.15636	0.063	50
186	oxytetracycline	-0.525	3	-0.589	0.15674	0.1557	66
187	monensin	0.229	6	0.43	0.15828	0.6296	50
188	cefotetan	0.394	3	0.589	0.15838	0.1177	66
189	hydrochlorothiazide	0.311	5	0.469	0.15981	0.1679	60
190	butoconazole	-0.497	4	-0.515	0.16286	0.1832	75
191	terconazole	-0.389	4	-0.515	0.16306	0.1628	75
192	nomegestrol	0.435	3	0.584	0.16555	0.2671	66
193	netilmicin	0.307	4	0.51	0.16575	0.1857	50
194	ionomycin	-0.465	3	-0.583	0.16609	0.2787	66
195	Prestwick-642	0.119	4	0.51	0.16714	0.4671	50
196	Prestwick-675	0.351	4	0.509	0.1677	0.2627	50
197	proxymetacaine	-0.516	4	-0.511	0.16796	0.1123	75
198	ajmaline	0.42	3	0.581	0.16988	0.4035	66
199	Prestwick-685	-0.54	5	-0.462	0.17054	0.3211	80
200	florfenicol	0.136	4	0.507	0.17168	0.1503	50
201	karakoline	0.258	6	0.422	0.17256	0.3155	50
202	sulfamethoxypyridazine	-0.49	5	-0.461	0.17268	0.4356	80
203	phenelzine	-0.366	6	-0.423	0.17325	0.1222	50
204	enilconazole	-0.506	4	-0.507	0.1744	0.1926	75
205	acetylsalicylsalicylic acid	-0.332	4	-0.507	0.17514	0.2328	50
206	procyclidine	-0.504	4	-0.507	0.17514	0.1724	75
207	streptomycin	-0.511	4	-0.506	0.17571	0.2606	75
208	mebendazole	-0.336	5	-0.458	0.17671	0.4272	60
209	esculin	-0.52	4	-0.505	0.17751	0.2147	75
210	AH-23848	-0.502	3	-0.575	0.17845	0.2133	66
211	citiolone	-0.26	6	-0.42	0.17961	0.2778	66
212	Prestwick-984	-0.289	4	-0.502	0.1829	0.2167	50
213	pyrazinamide	-0.496	4	-0.499	0.18676	0.3351	75
214	imatinib	-0.627	2	-0.694	0.18681	0.2133	100
215	STOCK1N-35696	0.408	2	0.694	0.18722	0.2651	50
216	levamisole	-0.333	4	-0.498	0.18767	0.4124	50
217	dexibuprofen	-0.515	4	-0.497	0.18968	0.1272	75
218	tiabendazole	-0.516	4	-0.496	0.19227	0.4078	75
219	deferoxamine	-0.265	8	-0.361	0.1937	0.3742	50
220	Prestwick-981	-0.428	3	-0.566	0.1942	0.122	66
221	dyclonine	-0.323	4	-0.494	0.19553	0.1618	75
222	mefloquine	-0.373	5	-0.448	0.19648	0.4444	60
223	methylprednisolone	0.344	4	0.49	0.19969	0.1579	50
224	3-acetamidocoumarin	0.307	4	0.49	0.20022	0.6076	50
225	pirlindole	-0.408	3	-0.563	0.20075	0.1633	66
226	thiamazole	-0.29	6	-0.41	0.2019	0.3088	50
227	heptaminol	0.386	5	0.447	0.20218	0.5602	60
228	depudecin	0.312	2	0.681	0.20329	0.1125	50
229	ethosuximide	-0.374	4	-0.489	0.20466	0.2644	50
230	puromycin	-0.425	4	-0.487	0.20788	0.4627	50
231	N-acetylmuramic acid	0.324	4	0.482	0.21403	0.259	50
232	sotalol	-0.513	4	-0.483	0.21506	0.24	75
233	ondansetron	0.302	4	0.481	0.2157	0.3911	50
234	Prestwick-1084	-0.466	4	-0.483	0.21618	0.6558	75
235	sertaconazole	-0.331	4	-0.483	0.21618	0.262	50
236	betulinic acid	0.153	4	0.48	0.21749	0.3631	50
237	benperidol	-0.508	4	-0.482	0.21775	0.1841	75
238	terfenadine	-0.515	3	-0.552	0.21973	0.4404	66
239	cyanocobalamin	0.203	4	0.479	0.21978	0.1417	50
240	tyloxapol	-0.361	4	-0.479	0.22338	0.5495	75
241	rescinnamine	-0.391	3	-0.55	0.22356	0.2231	66
242	niclosamide	-0.44	5	-0.435	0.22511	0.405	60
243	lymecycline	0.19	4	0.476	0.22531	0.1504	50
244	prochlorperazine	-0.255	16	-0.25	0.22543	0.566	50
245	clomipramine	-0.326	4	-0.479	0.22557	0.4122	50
246	cefoperazone	0.424	3	0.55	0.22564	0.3235	66
247	quinidine	-0.497	3	-0.548	0.22719	0.1988	66
248	tolnaftate	0.398	5	0.435	0.22828	0.3522	60
249	alpha-yohimbine	0.47	3	0.548	0.22911	0.3293	66
250	nadolol	0.392	4	0.473	0.2308	0.7528	50
251	amiprilose	-0.235	4	-0.476	0.23141	0.2412	50
252	Prestwick-1080	-0.337	4	-0.475	0.23207	0.3687	75
253	oleandomycin	0.293	5	0.433	0.23228	0.1953	60
254	ebselen	-0.481	3	-0.545	0.23323	0.4207	66
255	5279552	0.295	2	0.658	0.23506	0.2083	50
256	bromperidol	-0.483	3	-0.544	0.23512	0.253	66
257	ketanserin	-0.567	4	-0.474	0.23543	0.2742	75
258	orciprenaline	-0.214	4	-0.473	0.23858	0.2	50
259	aconitine	0.434	4	0.47	0.23899	0.2026	50
260	clindamycin	-0.206	5	-0.427	0.24234	0.2931	60
261	triflupromazine	0.329	4	0.468	0.24285	0.4133	50
262	isoflupredone	0.456	3	0.54	0.24433	0.7396	66
263	flunisolide	-0.317	6	-0.391	0.2454	0.3235	66
264	promazine	-0.449	6	-0.391	0.24653	0.3028	66
265	valdecoxib	-0.461	3	-0.536	0.25164	0.1961	66
266	piroxicam	-0.349	4	-0.467	0.25169	0.3567	50
267	clemastine	0.42	3	0.536	0.2529	0.4715	66
268	dextromethorphan	-0.387	4	-0.465	0.25411	0.4264	75
269	16-phenyltetranorprostaglandin E2	0.333	4	0.461	0.25889	0.1944	50
270	quipazine	0.356	4	0.46	0.26143	0.2941	50
271	ozagrel	-0.28	4	-0.462	0.26273	0.2428	50
272	clopamide	0.363	4	0.458	0.26489	0.2279	50
273	diclofenac	-0.363	5	-0.417	0.26593	0.2554	60
274	tetraethylenepentamine	-0.259	6	-0.383	0.26799	0.2971	50
275	buspirone	0.318	4	0.457	0.26911	0.1554	50
276	calmidazolium	-0.339	2	-0.634	0.26928	0.3607	50
277	apigenin	-0.491	4	-0.459	0.26947	0.7228	75
278	pregnenolone	0.296	4	0.456	0.27076	0.4	50
279	pyrithyldione	0.267	4	0.456	0.27076	0.4647	50
280	methylbenzethonium chloride	-0.435	6	-0.381	0.27172	0.4132	66
281	propidium iodide	-0.314	4	-0.458	0.27235	0.1589	50
282	Prestwick-665	-0.37	5	-0.414	0.27295	0.4497	60
283	indapamide	-0.177	6	-0.381	0.27351	0.2727	50
284	etofylline	-0.277	5	-0.413	0.27578	0.4053	60
285	methazolamide	-0.34	4	-0.456	0.27639	0.4272	50
286	sulfachlorpyridazine	-0.197	5	-0.413	0.27668	0.3607	60
287	isoniazid	0.236	5	0.412	0.27954	0.5298	60
288	iloprost	0.234	3	0.523	0.27981	0.5526	66
289	pepstatin	0.215	4	0.452	0.27991	0.2778	50
290	Prestwick-983	0.209	3	0.522	0.28409	0.6024	66
291	3-acetylcoumarin	-0.443	5	-0.409	0.28667	0.4492	60
292	atovaquone	-0.468	3	-0.519	0.2877	0.427	66
293	monorden	-0.265	22	-0.203	0.29009	0.608	50
294	nocodazole	-0.332	6	-0.375	0.29031	0.4436	66
295	bufexamac	-0.328	4	-0.45	0.29054	0.4706	50
296	scopolamine	0.184	4	0.447	0.29225	0.3818	50
297	asiaticoside	0.397	4	0.445	0.29639	0.327	50
298	myricetin	-0.488	4	-0.447	0.29849	0.3423	75
299	gossypol	-0.277	6	-0.371	0.29905	0.5076	50
300	dexamethasone	-0.249	8	-0.325	0.29996	0.3139	62
301	resveratrol	-0.31	9	-0.306	0.30184	0.75	55
302	isoetarine	0.124	4	0.443	0.30287	0.2467	50
303	biotin	-0.205	3	-0.512	0.30334	0.2102	66
304	corynanthine	-0.462	3	-0.511	0.30428	0.4348	66
305	CP-863187	0.191	4	0.442	0.30464	0.3521	50
306	metoprolol	0.237	4	0.442	0.30464	0.4144	50
307	zaprinast	0.266	4	0.442	0.3055	0.349	50
308	mecamylamine	0.152	3	0.511	0.30613	0.2791	66
309	amiodarone	-0.415	5	-0.4	0.30652	0.5749	60
310	metanephrine	0.251	5	0.401	0.30752	0.2839	60
311	zardaverine	0.303	4	0.441	0.30906	0.3696	50
312	altizide	0.353	4	0.441	0.30955	0.2076	50
313	glibenclamide	-0.267	4	-0.443	0.30967	0.5377	75
314	F0447-0125	-0.362	4	-0.442	0.31103	0.2137	50
315	phthalylsulfathiazole	-0.304	5	-0.398	0.31413	0.7839	60
316	benzylpenicillin	-0.338	4	-0.44	0.31636	0.3702	50
317	dl-alpha tocopherol	-0.078	4	-0.44	0.3169	0.1639	50
318	epiandrosterone	0.187	4	0.438	0.31695	0.4157	50
319	dipivefrine	0.219	4	0.437	0.32099	0.175	50
320	nifuroxazide	-0.481	4	-0.438	0.32326	0.383	75
321	betaxolol	-0.484	4	-0.437	0.32368	0.5026	75
322	cyclopentolate	-0.321	4	-0.434	0.33331	0.3625	75
323	tetroquinone	-0.32	4	-0.434	0.33368	0.2924	75
324	Prestwick-967	0.31	4	0.432	0.3343	0.3231	50
325	nomifensine	-0.174	5	-0.391	0.33508	0.2635	60
326	dosulepin	0	4	0.431	0.3378	0.4308	50
327	fluvoxamine	-0.33	4	-0.432	0.33844	0.3977	50
328	alexidine	-0.376	4	-0.432	0.3392	0.3248	50
329	8-azaguanine	-0.446	4	-0.431	0.34091	0.6504	75
330	trichlormethiazide	-0.314	4	-0.431	0.34091	0.3095	50
331	vanoxerine	0.233	4	0.429	0.3418	0.4948	50
332	crotamiton	0.197	4	0.429	0.34204	0.233	50
333	timolol	0.369	4	0.429	0.34254	0.6629	50
334	hydroquinine	-0.046	4	-0.429	0.34638	0.3972	50
335	Trolox C	0.176	4	0.427	0.34679	0.2195	50
336	noscapine	-0.256	4	-0.429	0.34691	0.2391	75
337	arachidonic acid	-0.487	3	-0.492	0.34981	0.4808	66
338	PNU-0230031	0.074	8	0.309	0.35334	0.3	50
339	ouabain	-0.343	4	-0.426	0.35604	0.4386	50
340	mometasone	-0.371	4	-0.426	0.35658	0.3248	50
341	pirinixic acid	-0.399	5	-0.383	0.35678	0.4066	60
342	levcycloserine	-0.334	4	-0.425	0.35988	0.4949	75
343	fusaric acid	0.337	4	0.422	0.36096	0.4264	50
344	erastin	-0.366	4	-0.422	0.36649	0.3358	50
345	L-methionine sulfoximine	-0.377	4	-0.422	0.36746	0.2971	50
346	fluorometholone	0.354	4	0.42	0.36768	0.2987	50
347	fenbendazole	-0.247	4	-0.422	0.36822	0.2893	50
348	procarbazine	0.483	3	0.483	0.37215	0.367	66
349	tocainide	0.358	4	0.418	0.37311	0.5223	50
350	pentetrazol	-0.339	4	-0.419	0.3757	0.4627	75
351	artemisinin	-0.496	3	-0.481	0.37633	0.4096	66
352	paroxetine	-0.362	4	-0.419	0.37665	0.3409	50
353	reserpine	-0.249	3	-0.481	0.37769	0.4564	66
354	nifurtimox	-0.336	4	-0.418	0.3785	0.4951	75
355	iohexol	0.332	4	0.415	0.38159	0.6743	50
356	parthenolide	-0.431	4	-0.416	0.38421	0.731	75
357	deptropine	-0.38	4	-0.416	0.38513	0.5448	50
358	CAY-10397	-0.479	3	-0.478	0.38577	0.4641	66
359	harman	-0.212	4	-0.415	0.3874	0.3167	50
360	eldeline	-0.166	6	-0.343	0.38846	0.5581	66
361	palmatine	-0.278	4	-0.414	0.38919	0.3947	75
362	Prestwick-692	0.358	4	0.413	0.38929	0.8	50
363	naftifine	0.337	4	0.413	0.38929	0.434	50
364	galantamine	-0.5	4	-0.414	0.39116	0.3946	75
365	copper sulfate	-0.033	4	-0.413	0.39446	0.3897	50
366	fusidic acid	-0.349	4	-0.412	0.39603	0.3837	50
367	fendiline	-0.478	3	-0.473	0.39819	0.4286	66
368	scoulerine	-0.393	4	-0.411	0.3983	0.3529	50
369	ursolic acid	-0.332	4	-0.411	0.39862	0.4964	75
370	5182598	-0.394	2	-0.554	0.3989	0.6793	50
371	mebhydrolin	0.311	4	0.409	0.39993	0.5181	50
372	gramine	-0.308	4	-0.411	0.40064	0.3771	50
373	suprofen	-0.374	4	-0.41	0.40279	0.4756	50
374	iobenguane	-0.214	4	-0.409	0.40446	0.4195	50
375	riboflavin	-0.249	4	-0.409	0.40446	0.7068	75
376	oxaprozin	-0.354	6	-0.338	0.40479	0.4155	50
377	penbutolol	0.419	3	0.468	0.40844	0.6045	66
378	sisomicin	-0.079	4	-0.408	0.40852	0.3636	50
379	5155877	-0.34	4	-0.408	0.40944	0.579	50
380	bergenin	-0.373	4	-0.407	0.41246	0.3961	50
381	azacitidine	-0.381	3	-0.466	0.41619	0.6635	66
382	oxolamine	0.21	4	0.404	0.4162	0.6319	50
383	lobeline	0.155	4	0.404	0.41735	0.2059	50
384	fursultiamine	-0.221	4	-0.405	0.41891	0.3535	50
385	isocorydine	-0.147	4	-0.405	0.41932	0.2993	50
386	harmol	-0.382	4	-0.404	0.42107	0.6721	50
387	sulfacetamide	-0.324	4	-0.404	0.42203	0.4667	50
388	tolbutamide	-0.298	7	-0.311	0.42494	0.3697	57
389	triflusal	-0.249	3	-0.462	0.42583	0.6769	66
390	halofantrine	0.169	3	0.46	0.42979	0.6035	66
391	pentolonium	-0.282	5	-0.361	0.43104	0.3951	60
392	etamivan	0.174	4	0.399	0.43158	0.4018	50
393	lovastatin	-0.329	4	-0.4	0.435	0.4961	50
394	etifenin	-0.376	4	-0.399	0.43591	0.5115	50
395	mimosine	0.133	3	0.458	0.4365	0.5215	66
396	metixene	0.213	4	0.396	0.44125	0.6868	50
397	verapamil	0.226	6	0.327	0.44218	0.3487	50
398	pentoxyverine	-0.379	4	-0.396	0.44686	0.6954	50
399	bretylium tosilate	0.014	4	0.395	0.44719	0.4	50
400	tolfenamic acid	-0.385	4	-0.395	0.4493	0.5118	50
401	tolmetin	-0.345	4	-0.395	0.4493	0.311	50
402	N6-methyladenosine	0.245	4	0.393	0.45089	0.515	50
403	(+/-)-catechin	-0.206	4	-0.395	0.45147	0.4808	50
404	imipenem	-0.214	4	-0.395	0.45203	0.6961	50
405	sulfaquinoxaline	0.149	3	0.451	0.45417	0.6133	66
406	ethionamide	0.188	3	0.45	0.45695	0.5132	66
407	antazoline	0.175	4	0.391	0.45774	0.5163	50
408	ganciclovir	0.004	4	0.391	0.45835	0.4148	50
409	fluoxetine	-0.14	4	-0.392	0.46086	0.5167	50
410	metacycline	-0.296	4	-0.392	0.46086	0.6788	50
411	paromomycin	-0.334	4	-0.391	0.46414	0.4138	50
412	alvespimycin	-0.252	12	-0.232	0.46899	0.6449	50
413	furaltadone	-0.33	6	-0.32	0.47112	0.6358	50
414	menadione	-0.335	2	-0.514	0.47121	0.5172	50
415	quinisocaine	-0.363	4	-0.387	0.47516	0.432	50
416	5252917	-0.313	2	-0.512	0.47632	0.6627	50
417	indoprofen	0.181	4	0.385	0.47737	0.7284	50
418	ethotoin	-0.382	6	-0.319	0.47829	0.7487	50
419	bupivacaine	-0.178	4	-0.386	0.47859	0.4259	50
420	oxymetazoline	-0.374	4	-0.386	0.48075	0.5542	50
421	promethazine	-0.351	4	-0.385	0.48386	0.5655	50
422	iopromide	0.199	4	0.383	0.484	0.6421	50
423	chlortalidone	0.195	4	0.382	0.48726	0.5804	50
424	mephenesin	-0.37	5	-0.346	0.48737	0.6199	60
425	chlorzoxazone	-0.134	4	-0.383	0.48917	0.7789	50
426	R-atenolol	-0.215	4	-0.382	0.49054	0.3968	50
427	C-75	-0.292	4	-0.382	0.49175	0.4297	50
428	xylometazoline	-0.349	4	-0.38	0.49822	0.6243	50
429	bumetanide	0.242	4	0.377	0.5048	0.6951	50
430	dihydroergotamine	-0.271	5	-0.339	0.50944	0.3525	60
431	trazodone	-0.485	3	-0.431	0.50947	0.8034	66
432	diethylstilbestrol	-0.251	6	-0.31	0.51343	0.6148	50
433	neostigmine bromide	0.146	4	0.374	0.51485	0.4565	50
434	ampicillin	0.182	4	0.372	0.52062	0.549	50
435	carbamazepine	-0.164	8	-0.268	0.53029	0.6364	50
436	flecainide	0.088	6	0.305	0.53033	0.4713	50
437	gibberellic acid	0.183	4	0.369	0.53261	0.424	50
438	rolitetracycline	-0.318	4	-0.368	0.53954	0.7318	50
439	amantadine	-0.194	4	-0.368	0.53997	0.6928	50
440	harpagoside	0.188	4	0.366	0.54391	0.6968	50
441	Prestwick-682	-0.161	4	-0.367	0.54519	0.5315	50
442	acepromazine	-0.389	4	-0.367	0.54519	0.7514	50
443	oxyphenbutazone	0.212	4	0.364	0.5504	0.7617	50
444	phenoxybenzamine	-0.345	4	-0.364	0.55468	0.7818	50
445	furosemide	0.015	4	0.362	0.55587	0.7399	50
446	oxantel	-0.336	4	-0.364	0.55684	0.5655	50
447	lansoprazole	0.026	4	0.362	0.55762	0.6154	50
448	metitepine	0.176	4	0.361	0.56064	0.7513	50
449	hydroxyachillin	-0.35	4	-0.362	0.56144	0.3832	50
450	prenylamine	-0.381	4	-0.362	0.56202	0.6514	50
451	tropine	0.103	4	0.36	0.56335	0.6563	50
452	beta-escin	-0.339	6	-0.298	0.56593	0.6942	50
453	2-aminobenzenesulfonamide	0.172	4	0.356	0.57558	0.7976	50
454	budesonide	-0.348	4	-0.357	0.57863	0.7166	50
455	PHA-00816795	-0.022	2	-0.479	0.57883	0.5969	50
456	octopamine	-0.159	4	-0.357	0.58034	0.5571	50
457	ornidazole	-0.341	5	-0.321	0.58164	0.7382	60
458	N-acetyl-L-aspartic acid	-0.338	4	-0.356	0.58356	0.454	50
459	mifepristone	-0.157	4	-0.356	0.58356	0.5633	50
460	ioversol	-0.047	4	-0.355	0.58525	0.6263	50
461	DL-thiorphan	-0.378	2	-0.477	0.58796	0.9091	50
462	protoveratrine A	-0.42	4	-0.354	0.58901	0.7175	50
463	rifabutin	-0.417	3	-0.401	0.59298	0.7333	66
464	loxapine	-0.362	4	-0.352	0.59701	0.4919	50
465	(-)-MK-801	0.001	4	0.35	0.59818	0.5906	50
466	protriptyline	-0.344	4	-0.351	0.60013	0.7143	50
467	isopropamide iodide	0.05	4	0.35	0.60031	0.5547	50
468	vancomycin	0.325	4	0.349	0.60194	0.7964	50
469	AH-6809	0.072	2	0.473	0.60205	0.579	50
470	norfloxacin	-0.323	5	-0.315	0.60344	0.6474	60
471	androsterone	0.068	4	0.348	0.60662	0.4487	50
472	pseudopelletierine	-0.344	4	-0.348	0.61103	0.7389	50
473	carbinoxamine	0.196	4	0.346	0.6126	0.5887	50
474	fasudil	0.372	2	0.469	0.61438	0.5111	50
475	pipenzolate bromide	0.152	4	0.345	0.61461	0.6131	50
476	vinpocetine	0.141	4	0.345	0.61461	0.5772	50
477	capsaicin	-0.321	4	-0.346	0.61736	0.6885	50
478	prasterone	-0.162	4	-0.345	0.62016	0.56	50
479	amphotericin B	-0.19	4	-0.343	0.62613	0.6603	50
480	etoposide	0.144	4	0.342	0.62629	0.841	50
481	chlorphenamine	0.21	4	0.342	0.62812	0.576	50
482	dequalinium chloride	-0.332	4	-0.342	0.63106	0.7644	50
483	propranolol	0.172	4	0.34	0.63435	0.5833	50
484	calycanthine	0.173	4	0.339	0.63536	0.6272	50
485	dimethadione	-0.157	4	-0.34	0.63681	0.6919	50
486	azathioprine	-0.204	7	-0.261	0.63833	0.6027	57
487	syrosingopine	0.164	4	0.337	0.6425	0.8372	50
488	gliquidone	-0.336	4	-0.339	0.64264	0.6429	50
489	cefixime	0.185	4	0.337	0.64338	0.4712	50
490	ketoconazole	0.149	4	0.337	0.64471	0.6291	50
491	xylazine	-0.3	4	-0.338	0.64497	0.6526	50
492	scopoletin	-0.396	2	-0.461	0.64571	0.8029	50
493	enoxacin	-0.275	4	-0.337	0.64736	0.5988	50
494	folic acid	-0.188	4	-0.337	0.64736	0.7647	50
495	berberine	-0.133	4	-0.336	0.65102	0.7616	50
496	azlocillin	-0.357	4	-0.334	0.65673	0.7402	50
497	etodolac	-0.194	5	-0.301	0.65918	0.6875	60
498	tubocurarine chloride	-0.345	4	-0.333	0.66116	0.6701	50
499	physostigmine	-0.365	4	-0.333	0.66309	0.6226	50
500	selegiline	-0.343	4	-0.333	0.66309	0.6433	50
501	retrorsine	-0.192	4	-0.332	0.66375	0.645	50
502	picotamide	-0.388	5	-0.3	0.66444	0.75	60
503	PHA-00846566E	-0.435	3	-0.373	0.672	0.6818	66
504	helveticoside	-0.193	6	-0.273	0.67407	0.8831	50
505	albendazole	-0.434	3	-0.371	0.67675	0.7357	66
506	hydrastine hydrochloride	-0.035	4	0.327	0.67909	0.6058	50
507	STOCK1N-35874	0.294	2	0.45	0.67933	0.7391	50
508	alsterpaullone	-0.389	3	-0.369	0.68298	0.8571	66
509	nifedipine	-0.164	7	-0.25	0.68649	0.675	57
510	adipiodone	0.021	4	0.324	0.68927	0.6316	50
511	propofol	-0.363	4	-0.324	0.69058	0.6707	50
512	kaempferol	-0.042	4	0.322	0.69361	0.7448	50
513	phenylpropanolamine	-0.315	4	-0.323	0.69375	0.689	50
514	chlorphenesin	-0.349	4	-0.323	0.69502	0.801	50
515	betahistine	-0.359	4	-0.322	0.69741	0.7771	50
516	ketotifen	-0.006	4	0.321	0.69777	0.8263	50
517	cefadroxil	-0.332	4	-0.322	0.69902	0.69	50
518	simvastatin	-0.182	4	-0.321	0.70069	0.7133	50
519	medrysone	-0.222	6	-0.266	0.70385	0.9243	50
520	denatonium benzoate	-0.203	4	-0.32	0.70626	0.8394	50
521	cefepime	0.147	4	0.318	0.70855	0.7807	50
522	canavanine	-0.381	3	-0.359	0.71118	0.7629	66
523	sanguinarine	-0.385	2	-0.44	0.71174	0.85	50
524	benzthiazide	-0.291	4	-0.318	0.71316	0.7908	50
525	baclofen	-0.228	5	-0.287	0.71565	0.7249	60
526	AG-013608	-0.23	8	-0.23	0.71602	0.7368	50
527	bezafibrate	-0.314	4	-0.317	0.71656	0.8069	50
528	sulfadoxine	-0.424	3	-0.357	0.71717	0.8101	66
529	picrotoxinin	0.087	4	0.315	0.71867	0.6947	50
530	tiletamine	-0.13	4	-0.316	0.71875	0.7727	50
531	MK-886	0.046	2	0.436	0.72146	0.7516	50
532	proadifen	0.117	4	0.313	0.72263	0.8782	50
533	spiperone	-0.383	2	-0.435	0.72484	0.7193	50
534	levonorgestrel	-0.239	6	-0.261	0.725	0.8853	50
535	exisulind	0.333	2	0.435	0.72583	0.6812	50
536	meclozine	-0.215	5	-0.284	0.72707	0.7736	60
537	bacampicillin	0.134	4	0.312	0.72721	0.7627	50
538	abamectin	-0.193	4	-0.312	0.73188	0.7469	50
539	estrone	0.016	4	0.311	0.73262	0.6522	50
540	molsidomine	-0.141	4	-0.312	0.7329	0.6903	50
541	kanamycin	-0.144	4	-0.311	0.73347	0.763	50
542	cinchonine	-0.208	4	-0.309	0.74048	0.8827	50
543	isosorbide	0.154	4	0.307	0.74312	0.8045	50
544	hexetidine	0.102	4	0.306	0.74557	0.9321	50
545	flurbiprofen	-0.252	5	-0.278	0.74977	0.7784	60
546	hexylcaine	0.139	4	0.305	0.75004	0.6454	50
547	ciprofibrate	0	4	0.304	0.75172	0.8026	50
548	fluvastatin	-0.336	4	-0.302	0.76107	0.7014	50
549	Prestwick-664	-0.346	6	-0.251	0.76415	0.8728	50
550	STOCK1N-35215	-0.344	3	-0.338	0.76771	0.7687	66
551	0316684-0000	-0.159	4	-0.3	0.76783	0.7564	50
552	procaine	-0.185	5	-0.273	0.76958	0.9036	60
553	methoxsalen	-0.151	3	-0.337	0.76959	0.7529	66
554	diclofenamide	-0.316	4	-0.299	0.77276	0.7456	50
555	tiaprofenic acid	-0.165	4	-0.298	0.77449	0.8049	50
556	trimethoprim	-0.225	5	-0.27	0.77883	0.7115	60
557	parbendazole	-0.314	4	-0.296	0.78116	0.8895	50
558	trimetazidine	-0.347	4	-0.294	0.78864	0.9239	50
559	aminophenazone	-0.187	5	-0.267	0.78967	0.8	60
560	dexpanthenol	0.121	4	0.292	0.79138	0.7664	50
561	iopamidol	0.133	4	0.291	0.79262	0.8931	50
562	rolipram	-0.155	4	-0.291	0.79542	0.7895	50
563	metamizole sodium	-0.179	6	-0.242	0.80199	0.9474	50
564	Prestwick-857	0.03	4	0.287	0.80656	0.871	50
565	lasalocid	0.048	4	0.287	0.80682	0.9363	50
566	chloramphenicol	-0.338	4	-0.287	0.81052	0.8571	50
567	hydrocotarnine	-0.134	4	-0.284	0.81778	0.8956	50
568	methylergometrine	-0.324	4	-0.282	0.8223	0.8929	50
569	chlorprothixene	-0.06	4	0.281	0.82261	0.8458	50
570	bupropion	-0.183	4	-0.278	0.83413	0.8941	50
571	NU-1025	0.019	2	0.392	0.83888	0.7698	50
572	hemicholinium	-0.305	4	-0.274	0.84643	0.8722	50
573	alcuronium chloride	-0.045	2	-0.387	0.85037	0.904	50
574	propylthiouracil	-0.368	4	-0.27	0.8579	0.9583	50
575	meropenem	-0.361	4	-0.265	0.87161	0.8836	50
576	apramycin	-0.176	4	-0.263	0.87557	0.9431	50
577	hecogenin	-0.318	4	-0.263	0.8764	0.884	50
578	metergoline	-0.172	4	-0.263	0.8771	0.8609	50
579	prilocaine	-0.144	6	-0.218	0.88332	0.9048	50
580	hexestrol	-0.16	4	-0.259	0.88558	0.927	50
581	pridinol	-0.351	4	-0.259	0.88669	0.9519	50
582	indometacin	-0.234	8	-0.187	0.89588	0.9402	50
583	7-aminocephalosporanic acid	-0.141	4	-0.254	0.89853	0.8634	50
584	santonin	-0.169	4	-0.253	0.90109	0.8889	50
585	fosfosal	-0.125	4	-0.251	0.90443	0.883	50
586	oxybuprocaine	-0.318	4	-0.251	0.90515	0.9101	50
587	mepacrine	-0.352	2	-0.358	0.90526	0.9	50
588	tremorine	-0.201	4	-0.249	0.90967	0.9543	50
589	nortriptyline	-0.134	4	-0.249	0.9103	0.8978	50
590	5253409	-0.349	2	-0.352	0.91682	0.812	50
591	butein	-0.037	2	-0.351	0.91831	0.9645	50
592	glycocholic acid	-0.172	4	-0.245	0.92309	0.9535	50
593	metyrapone	-0.314	4	-0.244	0.92381	0.9735	50
594	boldine	-0.243	4	-0.244	0.92425	0.9064	50
595	5248896	-0.347	2	-0.344	0.92932	0.9803	50
596	Y-27632	-0.331	2	-0.336	0.93926	0.9891	50
597	tonzonium bromide	-0.319	4	-0.235	0.94368	0.9397	50
598	ritodrine	-0.31	4	-0.234	0.94756	0.9241	50
599	quinethazone	-0.146	4	-0.231	0.95172	0.9842	50
600	N-acetyl-L-leucine	-0.169	4	-0.225	0.96185	0.9797	50
601	zoxazolamine	-0.152	4	-0.213	0.97826	0.995	50
602	maprotiline	-0.174	4	-0.206	0.98397	0.9915	50
603	thioguanosine	-0.182	4	-0.202	0.98713	1	50
604	ciclacillin	-0.146	4	-0.198	0.98966	0.9832	50
605	phensuximide	-0.163	4	-0.188	0.99385	1	50
606	DL-PPMP	0.889	1	0.998	---	---	100
607	12,13-EODE	0.805	1	0.982	---	---	100
608	1,5-isoquinolinediol	0.797	1	0.979	---	---	100
609	5186223	0.776	1	0.97	---	---	100
610	cytochalasin B	-0.794	1	-0.962	---	---	100
611	gefitinib	0.737	1	0.946	---	---	100
612	oxamic acid	0.737	1	0.945	---	---	100
613	BW-B70C	0.731	1	0.94	---	---	100
614	dexverapamil	-0.769	1	-0.938	---	---	100
615	5213008	-0.753	1	-0.923	---	---	100
616	celastrol	-0.726	1	-0.891	---	---	100
617	exemestane	-0.723	1	-0.888	---	---	100
618	5149715	0.667	1	0.885	---	---	100
619	HNMPA-(AM)3	-0.718	1	-0.88	---	---	100
620	5140203	-0.717	1	-0.879	---	---	100
621	N-phenylanthranilic acid	0.657	1	0.876	---	---	100
622	oligomycin	-0.713	1	-0.874	---	---	100
623	fisetin	-0.71	1	-0.869	---	---	100
624	pararosaniline	-0.706	1	-0.862	---	---	100
625	phenyl biguanide	0.633	1	0.854	---	---	100
626	sulindac sulfide	-0.685	1	-0.83	---	---	100
627	tyrphostin AG-1478	0.522	1	0.792	---	---	100
628	dimethyloxalylglycine	-0.649	1	-0.786	---	---	100
629	topiramate	-0.637	1	-0.769	---	---	100
630	cantharidin	0	1	0.762	---	---	0
631	5286656	-0.631	1	-0.76	---	---	100
632	MS-275	0	2	0.745	---	---	0
633	2-deoxy-D-glucose	0	1	0.745	---	---	0
634	anabasine	0.229	3	0.728	---	---	33
635	5109870	0	1	0.712	---	---	0
636	5186324	0	1	0.712	---	---	0
637	dirithromycin	0.236	3	0.703	---	---	33
638	5666823	0	1	0.686	---	---	0
639	5114445	0	1	0.677	---	---	0
640	dopamine	0	1	0.662	---	---	0
641	isoxsuprine	0.318	5	0.658	---	---	40
642	MG-132	0	1	-0.657	---	---	0
643	Prestwick-1083	0.185	3	0.655	---	---	33
644	clobetasol	0.255	3	0.637	---	---	33
645	tioguanine	0	1	-0.636	---	---	0
646	dexpropranolol	0.245	3	0.628	---	---	33
647	pronetalol	0.176	4	0.626	---	---	25
648	diethylcarbamazine	0.174	4	0.619	---	---	25
649	(-)-catechin	0	1	-0.618	---	---	0
650	ticarcillin	0	3	0.617	---	---	0
651	5162773	0	1	-0.616	---	---	0
652	ronidazole	0	3	0.616	---	---	0
653	BAS-012416453	0	3	-0.614	---	---	0
654	HC toxin	0	1	-0.611	---	---	0
655	5230742	0	2	0.604	---	---	0
656	tetryzoline	0.278	3	0.602	---	---	33
657	enalapril	0.165	4	0.599	---	---	25
658	pirenperone	0.238	5	0.598	---	---	40
659	decitabine	0	1	-0.595	---	---	0
660	NS-398	-0.22	3	-0.59	---	---	33
661	thioperamide	0.282	5	0.587	---	---	40
662	cimetidine	0.282	5	0.585	---	---	40
663	(+)-chelidonine	-0.197	4	-0.58	---	---	25
664	lynestrenol	0.263	5	0.579	---	---	40
665	phenanthridinone	0	1	-0.574	---	---	0
666	splitomicin	0	1	-0.574	---	---	0
667	dropropizine	0.205	4	0.573	---	---	25
668	carbimazole	-0.247	3	-0.573	---	---	33
669	fluticasone	0.219	4	0.572	---	---	25
670	ioxaglic acid	0.225	3	0.571	---	---	33
671	U0125	0	1	-0.564	---	---	0
672	camptothecin	0	3	0.56	---	---	0
673	alprostadil	0.269	7	0.557	---	---	42
674	demecolcine	0	1	-0.551	---	---	0
675	BCB000039	-0.185	3	-0.551	---	---	33
676	Prestwick-689	0.197	4	0.549	---	---	25
677	ifosfamide	0.233	3	0.547	---	---	33
678	canadine	0.146	4	0.544	---	---	25
679	5151277	0	1	-0.543	---	---	0
680	gentamicin	0	4	0.542	---	---	0
681	disulfiram	-0.317	5	-0.542	---	---	40
682	alpha-ergocryptine	-0.232	6	-0.542	---	---	33
683	sulfamethoxazole	0.29	5	0.541	---	---	40
684	3-aminobenzamide	0	1	-0.539	---	---	0
685	valinomycin	-0.191	4	-0.539	---	---	25
686	flavoxate	0.17	4	0.533	---	---	25
687	dilazep	-0.219	5	-0.53	---	---	40
688	etacrynic acid	-0.202	3	-0.528	---	---	33
689	piperacillin	0.171	5	0.527	---	---	40
690	tomelukast	0	1	0.526	---	---	0
691	decamethonium bromide	0.147	4	0.526	---	---	25
692	docosahexaenoic acid ethyl ester	0	2	-0.524	---	---	0
693	natamycin	0	4	0.524	---	---	0
694	metrizamide	0.157	4	0.518	---	---	25
695	clotrimazole	-0.227	5	-0.518	---	---	40
696	5152487	0	1	0.517	---	---	0
697	butirosin	0.07	4	0.517	---	---	25
698	salsolinol	0	3	0.516	---	---	0
699	chlorhexidine	0.241	5	0.515	---	---	40
700	prednisolone	0.149	5	0.515	---	---	40
701	celecoxib	0.265	5	0.514	---	---	40
702	milrinone	0.226	3	0.513	---	---	33
703	4,5-dianilinophthalimide	0	2	-0.51	---	---	0
704	vidarabine	0	4	0.51	---	---	0
705	clebopride	0.133	4	0.507	---	---	25
706	astemizole	-0.254	5	-0.507	---	---	40
707	prednicarbate	0	3	0.506	---	---	0
708	tyrphostin AG-825	0	1	-0.506	---	---	0
709	PHA-00665752	0	1	0.504	---	---	0
710	staurosporine	0	4	0.504	---	---	0
711	CP-645525-01	0	3	0.503	---	---	0
712	ampyrone	0.222	5	0.501	---	---	40
713	zomepirac	0	4	0.501	---	---	0
714	benzethonium chloride	-0.272	3	-0.5	---	---	33
715	nefopam	0.104	5	0.497	---	---	40
716	niflumic acid	0	4	0.496	---	---	0
717	raubasine	0.156	4	0.493	---	---	25
718	irinotecan	0	3	0.493	---	---	0
719	harmalol	0	3	0.492	---	---	0
720	IC-86621	0.207	4	0.492	---	---	25
721	tolazoline	0.156	5	0.491	---	---	20
722	flumequine	0	4	0.49	---	---	0
723	benzydamine	0.17	4	0.486	---	---	25
724	SC-560	-0.232	3	-0.485	---	---	33
725	coralyne	0.176	4	0.485	---	---	25
726	roxithromycin	0	4	0.484	---	---	0
727	dinoprostone	-0.034	4	0.484	---	---	25
728	piperine	-0.186	4	-0.483	---	---	25
729	pipemidic acid	0.221	3	0.483	---	---	33
730	profenamine	0	4	0.482	---	---	0
731	pentoxifylline	0.272	5	0.482	---	---	40
732	LM-1685	0	3	0.481	---	---	0
733	dobutamine	0	4	0.481	---	---	0
734	fenofibrate	-0.221	3	-0.481	---	---	33
735	letrozole	0.199	4	0.479	---	---	25
736	mercaptopurine	0	2	0.478	---	---	0
737	quinostatin	0	2	0.477	---	---	0
738	trioxysalen	0	4	0.474	---	---	0
739	levocabastine	0.171	4	0.474	---	---	25
740	mebeverine	-0.004	4	0.474	---	---	25
741	doxylamine	0	5	0.473	---	---	0
742	benzbromarone	0.189	3	0.471	---	---	33
743	tenoxicam	-0.158	4	-0.471	---	---	25
744	propoxycaine	0.184	4	0.469	---	---	25
745	naphazoline	0.105	5	0.465	---	---	20
746	tiratricol	0.167	4	0.462	---	---	25
747	6-azathymine	0.163	4	0.459	---	---	25
748	vinburnine	0	4	-0.458	---	---	0
749	lidoflazine	0	3	-0.457	---	---	0
750	6-benzylaminopurine	0.129	5	0.456	---	---	20
751	5255229	0	2	0.456	---	---	0
752	streptozocin	0.187	4	0.454	---	---	25
753	Prestwick-1085	0	4	0.454	---	---	0
754	cefuroxime	-0.147	4	-0.454	---	---	25
755	furazolidone	0.202	4	0.453	---	---	25
756	lactobionic acid	0	4	-0.451	---	---	0
757	naltrexone	0.291	5	0.451	---	---	40
758	tobramycin	0.005	4	0.45	---	---	25
759	velnacrine	0.04	4	0.45	---	---	25
760	aminoglutethimide	0	3	0.449	---	---	0
761	sulpiride	-0.014	5	0.449	---	---	20
762	nabumetone	0	4	0.449	---	---	0
763	gelsemine	-0.184	4	-0.448	---	---	25
764	mevalolactone	-0.094	3	0.448	---	---	33
765	lisinopril	0	3	0.446	---	---	0
766	adrenosterone	0.135	4	0.446	---	---	25
767	sitosterol	-0.171	4	-0.446	---	---	25
768	cefotiam	-0.147	4	-0.445	---	---	25
769	ceftazidime	-0.172	3	-0.444	---	---	33
770	domperidone	0.155	4	0.443	---	---	25
771	allantoin	0.11	5	0.442	---	---	20
772	pirenzepine	0	5	0.441	---	---	0
773	ipratropium bromide	0.001	3	0.441	---	---	33
774	chenodeoxycholic acid	0.163	4	0.44	---	---	25
775	securinine	-0.19	4	-0.439	---	---	25
776	hesperidin	-0.205	4	-0.438	---	---	25
777	podophyllotoxin	0.168	4	0.438	---	---	25
778	monastrol	0.165	8	0.437	---	---	37
779	sulfadiazine	0.095	5	0.437	---	---	40
780	proguanil	0.177	3	0.437	---	---	33
781	paracetamol	0	4	0.437	---	---	0
782	carisoprodol	0	4	0.436	---	---	0
783	thiethylperazine	0.171	4	0.436	---	---	25
784	digitoxigenin	0	4	0.434	---	---	0
785	oxetacaine	-0.168	5	-0.433	---	---	20
786	meptazinol	-0.182	4	-0.433	---	---	25
787	carteolol	0.209	4	0.431	---	---	25
788	amikacin	-0.166	4	-0.431	---	---	25
789	ketoprofen	-0.197	6	-0.43	---	---	33
790	bacitracin	0.216	3	0.43	---	---	33
791	prazosin	0.094	6	0.429	---	---	33
792	betulin	0	3	0.428	---	---	0
793	etomidate	0	3	-0.428	---	---	0
794	convolamine	0.154	4	0.427	---	---	25
795	flupentixol	0	4	0.427	---	---	0
796	josamycin	-0.026	5	0.425	---	---	20
797	torasemide	0	4	0.425	---	---	0
798	pempidine	0.266	5	0.424	---	---	40
799	finasteride	0.079	6	0.423	---	---	16
800	sulmazole	0.156	3	0.423	---	---	33
801	ginkgolide A	-0.196	4	0.422	---	---	0
802	ketorolac	-0.144	4	-0.422	---	---	25
803	CP-690334-01	-0.185	8	-0.421	---	---	37
804	citalopram	0.137	4	0.421	---	---	25
805	seneciphylline	0	4	0.42	---	---	0
806	4-hydroxyphenazone	-0.127	5	-0.418	---	---	20
807	cefalonium	-0.206	3	-0.417	---	---	33
808	nicotinic acid	-0.149	4	0.417	---	---	0
809	mafenide	-0.143	5	-0.415	---	---	20
810	carmustine	-0.255	3	-0.414	---	---	33
811	doxorubicin	-0.182	3	0.414	---	---	0
812	bethanechol	0.141	4	0.413	---	---	25
813	azaperone	0	4	0.413	---	---	0
814	meprylcaine	-0.176	4	-0.413	---	---	25
815	metampicillin	0.258	5	0.411	---	---	40
816	arecoline	0.034	4	0.411	---	---	25
817	bromocriptine	-0.034	5	0.41	---	---	20
818	rilmenidine	0	4	0.41	---	---	0
819	tracazolate	0.001	4	0.409	---	---	25
820	oxybenzone	0	4	-0.409	---	---	0
821	SR-95531	0.133	4	0.408	---	---	25
822	articaine	0	3	0.407	---	---	0
823	niridazole	-0.18	4	0.407	---	---	0
824	praziquantel	0	4	0.407	---	---	0
825	ethambutol	0.145	5	0.405	---	---	40
826	(-)-atenolol	0.017	4	0.405	---	---	25
827	AG-012559	-0.246	3	-0.404	---	---	33
828	AR-A014418	0	3	-0.403	---	---	0
829	diazoxide	-0.137	5	-0.403	---	---	20
830	zidovudine	0.031	4	0.403	---	---	25
831	hycanthone	-0.138	4	0.403	---	---	0
832	desipramine	0	4	-0.402	---	---	0
833	proxyphylline	0	4	0.402	---	---	0
834	alfaxalone	-0.25	3	-0.401	---	---	33
835	acetohexamide	-0.166	4	-0.401	---	---	25
836	memantine	0.171	4	0.401	---	---	25
837	flumetasone	-0.026	6	0.4	---	---	16
838	BCB000038	0.064	4	0.398	---	---	25
839	rofecoxib	0.013	6	0.398	---	---	16
840	5211181	0	2	0.398	---	---	0
841	amylocaine	-0.256	5	-0.397	---	---	40
842	vigabatrin	0.236	3	0.396	---	---	33
843	lidocaine	0.169	5	0.396	---	---	20
844	stachydrine	0.216	4	0.395	---	---	25
845	acebutolol	0.119	5	0.395	---	---	20
846	flunarizine	0	4	0.395	---	---	0
847	trihexyphenidyl	0	3	0.393	---	---	0
848	colecalciferol	-0.197	4	0.393	---	---	0
849	tranexamic acid	-0.171	5	-0.393	---	---	40
850	flunixin	-0.231	5	-0.393	---	---	40
851	fenspiride	0.131	5	0.392	---	---	20
852	isradipine	-0.186	4	-0.39	---	---	25
853	benzocaine	0.115	4	0.389	---	---	25
854	roxarsone	-0.159	4	-0.389	---	---	25
855	Prestwick-864	0	4	-0.389	---	---	0
856	tribenoside	0	4	0.389	---	---	0
857	altretamine	0.168	4	0.388	---	---	25
858	betonicine	-0.004	6	0.388	---	---	33
859	nizatidine	0	4	0.387	---	---	0
860	acemetacin	0.204	4	0.387	---	---	25
861	fluocinonide	0.144	5	0.386	---	---	20
862	nifenazone	0.111	5	0.386	---	---	40
863	homochlorcyclizine	0	4	0.386	---	---	0
864	pizotifen	-0.162	4	-0.385	---	---	25
865	clomifene	-0.134	4	-0.385	---	---	25
866	nimesulide	0.024	4	-0.384	---	---	25
867	pimethixene	0	3	0.384	---	---	33
868	methyldopa	-0.018	5	0.381	---	---	20
869	quinpirole	0.204	4	0.381	---	---	25
870	cromoglicic acid	0	2	0.381	---	---	0
871	riluzole	0.064	5	0.381	---	---	40
872	phenazone	-0.216	3	-0.38	---	---	33
873	amoxapine	-0.155	5	-0.38	---	---	40
874	novobiocin	0.318	9	0.38	---	---	44
875	methacholine chloride	-0.072	3	0.38	---	---	33
876	diprophylline	0	5	0.379	---	---	0
877	bisoprolol	-0.171	4	-0.379	---	---	25
878	minaprine	-0.108	5	-0.379	---	---	20
879	famprofazone	-0.087	6	0.379	---	---	0
880	midodrine	-0.008	5	0.379	---	---	40
881	clidinium bromide	0.135	4	0.377	---	---	25
882	STOCK1N-28457	-0.269	3	-0.376	---	---	33
883	mitoxantrone	-0.221	3	-0.375	---	---	33
884	zalcitabine	0	4	0.375	---	---	0
885	betamethasone	0.042	3	0.375	---	---	33
886	verteporfin	-0.284	3	-0.373	---	---	33
887	moroxydine	0.046	5	0.373	---	---	40
888	diphenhydramine	0.175	5	0.373	---	---	40
889	0179445-0000	-0.275	8	-0.373	---	---	37
890	nicardipine	-0.215	4	0.372	---	---	0
891	ticlopidine	-0.247	5	-0.372	---	---	40
892	S-propranolol	-0.039	4	0.372	---	---	25
893	trimipramine	-0.201	4	-0.372	---	---	25
894	ceforanide	0.18	4	-0.372	---	---	0
895	bucladesine	0.228	6	0.371	---	---	33
896	imidurea	-0.211	3	-0.371	---	---	33
897	pramocaine	-0.03	5	0.371	---	---	40
898	cyclic adenosine monophosphate	0	4	0.37	---	---	0
899	estriol	-0.165	4	0.37	---	---	0
900	urapidil	-0.176	4	-0.37	---	---	25
901	azacyclonol	0.197	5	0.369	---	---	40
902	alclometasone	0	4	0.369	---	---	0
903	nialamide	-0.163	4	-0.369	---	---	25
904	hymecromone	0	4	0.369	---	---	0
905	hydralazine	0.007	6	0.368	---	---	16
906	cefamandole	-0.001	4	0.368	---	---	25
907	eticlopride	0	4	-0.368	---	---	0
908	nystatin	0.199	3	0.367	---	---	33
909	Gly-His-Lys	0.292	3	0.367	---	---	33
910	bisacodyl	-0.179	4	-0.367	---	---	25
911	molindone	0	4	0.367	---	---	0
912	napelline	0.023	4	0.366	---	---	25
913	diphenylpyraline	0.087	6	0.366	---	---	33
914	racecadotril	-0.166	4	-0.365	---	---	25
915	apomorphine	0.133	5	0.363	---	---	40
916	co-dergocrine mesilate	-0.129	4	0.363	---	---	0
917	melatonin	0.193	4	0.363	---	---	25
918	thiamphenicol	0.293	5	0.362	---	---	40
919	beclometasone	-0.202	3	0.361	---	---	0
920	tetrahydroalstonine	0.127	4	0.361	---	---	25
921	pilocarpine	0.191	4	0.358	---	---	25
922	levomepromazine	0	4	-0.358	---	---	0
923	phenacetin	-0.21	4	-0.357	---	---	25
924	tolazamide	0	3	0.357	---	---	0
925	alimemazine	0.212	4	0.356	---	---	25
926	glafenine	0.025	4	0.356	---	---	25
927	5194442	-0.173	4	-0.356	---	---	25
928	dorzolamide	0.153	4	0.355	---	---	25
929	digoxigenin	0.034	5	0.354	---	---	20
930	perhexiline	-0.16	4	-0.354	---	---	25
931	moxisylyte	-0.277	5	-0.353	---	---	40
932	todralazine	0.118	5	0.352	---	---	20
933	atropine	-0.208	4	-0.352	---	---	25
934	butacaine	0.176	4	0.351	---	---	25
935	remoxipride	-0.18	4	0.351	---	---	0
936	gabexate	0.173	4	0.351	---	---	25
937	guanadrel	0.108	5	0.35	---	---	20
938	carbenoxolone	0	4	-0.35	---	---	0
939	methyldopate	0	4	0.35	---	---	0
940	dihydroergocristine	0	4	0.349	---	---	0
941	tiapride	0.012	5	0.348	---	---	20
942	chrysin	-0.274	3	0.348	---	---	0
943	theophylline	0	4	0.348	---	---	0
944	benzonatate	0.191	5	0.348	---	---	40
945	rimexolone	-0.053	4	0.347	---	---	25
946	(-)-isoprenaline	0.203	4	0.347	---	---	25
947	nisoxetine	-0.169	4	0.347	---	---	0
948	sulfadimethoxine	0.168	5	0.346	---	---	20
949	lithocholic acid	0.089	6	0.345	---	---	16
950	naftopidil	-0.238	3	-0.345	---	---	33
951	methanthelinium bromide	0.008	4	-0.343	---	---	25
952	anisomycin	-0.05	4	-0.343	---	---	25
953	neomycin	-0.129	5	-0.342	---	---	40
954	tropicamide	-0.009	6	0.341	---	---	16
955	Prestwick-691	-0.156	3	-0.341	---	---	33
956	lomustine	-0.015	4	-0.34	---	---	25
957	benserazide	-0.043	5	-0.339	---	---	20
958	thiamine	-0.218	3	-0.339	---	---	33
959	Chicago Sky Blue 6B	0.012	4	0.339	---	---	25
960	tetrandrine	-0.009	4	0.339	---	---	25
961	homatropine	0.129	5	0.339	---	---	40
962	rifampicin	-0.064	4	-0.338	---	---	25
963	ciclopirox	-0.174	4	0.338	---	---	0
964	lomefloxacin	0.03	6	0.338	---	---	16
965	doxepin	0.093	3	0.337	---	---	33
966	cloperastine	-0.115	6	-0.337	---	---	16
967	dapsone	0.222	5	0.336	---	---	40
968	H-7	-0.059	4	0.335	---	---	25
969	butyl hydroxybenzoate	-0.183	5	0.335	---	---	20
970	chloropyrazine	0.002	4	0.334	---	---	25
971	cephaeline	-0.163	5	-0.333	---	---	40
972	pentamidine	-0.191	5	-0.333	---	---	40
973	fipexide	0.028	3	0.332	---	---	33
974	ethoxyquin	0.001	5	0.332	---	---	40
975	vincamine	0.158	6	0.331	---	---	33
976	imipramine	-0.008	4	0.331	---	---	25
977	drofenine	-0.201	4	0.329	---	---	0
978	carcinine	-0.128	4	0.328	---	---	0
979	bephenium hydroxynaphthoate	0.007	5	0.328	---	---	20
980	iodixanol	-0.043	3	-0.328	---	---	33
981	norcyclobenzaprine	-0.214	4	-0.327	---	---	25
982	0173570-0000	-0.05	6	0.326	---	---	33
983	flufenamic acid	-0.199	6	-0.326	---	---	33
984	isometheptene	-0.13	4	0.325	---	---	0
985	lumicolchicine	0.074	3	0.325	---	---	33
986	methocarbamol	-0.068	3	-0.325	---	---	33
987	butamben	-0.133	4	-0.324	---	---	25
988	telenzepine	-0.001	4	0.324	---	---	25
989	dehydrocholic acid	0.163	5	0.323	---	---	40
990	bemegride	-0.05	4	0.323	---	---	25
991	hexamethonium bromide	0.14	5	0.322	---	---	40
992	dihydrostreptomycin	0.151	5	0.322	---	---	40
993	acacetin	0.005	6	0.321	---	---	16
994	succinylsulfathiazole	0.029	4	0.321	---	---	25
995	sulfabenzamide	-0.18	4	-0.32	---	---	25
996	megestrol	-0.133	4	0.32	---	---	0
997	metronidazole	0.09	5	0.32	---	---	40
998	GW-8510	-0.258	4	0.32	---	---	0
999	trimethobenzamide	-0.107	5	0.319	---	---	0
1000	repaglinide	0.008	4	0.319	---	---	25
1001	bambuterol	0.041	4	0.319	---	---	25
1002	chlorambucil	-0.175	4	-0.319	---	---	25
1003	sulfafurazole	-0.25	5	-0.318	---	---	40
1004	thalidomide	0.034	7	0.318	---	---	42
1005	pancuronium bromide	-0.115	4	0.318	---	---	25
1006	etofenamate	-0.146	4	0.317	---	---	0
1007	cicloheximide	0.008	4	-0.317	---	---	25
1008	guanethidine	0.01	3	0.316	---	---	33
1009	chloropyramine	0.044	4	-0.315	---	---	25
1010	ursodeoxycholic acid	0.036	3	0.315	---	---	33
1011	PNU-0251126	0.125	6	0.315	---	---	33
1012	oxybutynin	-0.001	4	-0.315	---	---	25
1013	ifenprodil	-0.253	4	0.314	---	---	0
1014	SC-58125	0.113	4	0.312	---	---	25
1015	meclofenoxate	0.028	6	0.312	---	---	16
1016	demeclocycline	-0.201	6	-0.312	---	---	33
1017	cinchocaine	-0.04	5	-0.312	---	---	20
1018	pindolol	-0.129	5	0.311	---	---	0
1019	propantheline bromide	-0.138	4	0.31	---	---	0
1020	Prestwick-972	0.002	3	0.31	---	---	33
1021	flucloxacillin	0.004	4	0.308	---	---	25
1022	hydrocortisone	0.032	3	0.308	---	---	33
1023	dioxybenzone	0.005	4	0.308	---	---	25
1024	dicloxacillin	0.067	4	0.308	---	---	25
1025	atropine methonitrate	0.021	3	0.307	---	---	33
1026	primidone	-0.007	4	-0.307	---	---	25
1027	flutamide	-0.291	5	-0.306	---	---	40
1028	alprenolol	0.062	4	0.306	---	---	25
1029	colistin	-0.002	4	-0.306	---	---	25
1030	phenazopyridine	0.006	4	0.304	---	---	25
1031	Prestwick-920	-0.154	4	-0.304	---	---	25
1032	saquinavir	0.026	4	0.304	---	---	25
1033	CP-320650-01	-0.092	8	-0.303	---	---	25
1034	cortisone	-0.031	3	-0.303	---	---	33
1035	mestranol	-0.182	4	0.302	---	---	0
1036	meticrane	-0.249	5	-0.302	---	---	40
1037	oxolinic acid	-0.117	5	0.302	---	---	0
1038	buflomedil	0.002	4	0.302	---	---	25
1039	clemizole	-0.113	5	0.302	---	---	0
1040	diphemanil metilsulfate	0.1	5	0.302	---	---	40
1041	vitexin	-0.026	4	-0.301	---	---	25
1042	colforsin	-0.274	5	0.301	---	---	0
1043	amoxicillin	-0.142	4	0.3	---	---	0
1044	alfadolone	-0.06	3	0.3	---	---	33
1045	yohimbine	-0.042	5	0.3	---	---	20
1046	clofilium tosylate	0.057	3	0.299	---	---	33
1047	dienestrol	0.028	3	0.298	---	---	33
1048	spectinomycin	-0.194	4	-0.298	---	---	25
1049	betazole	-0.002	5	0.298	---	---	40
1050	isoconazole	-0.104	5	-0.298	---	---	40
1051	phentolamine	-0.192	7	-0.297	---	---	28
1052	levodopa	-0.303	5	-0.297	---	---	40
1053	caffeic acid	0.024	3	0.297	---	---	33
1054	skimmianine	-0.159	4	-0.296	---	---	25
1055	mepyramine	-0.165	4	-0.296	---	---	25
1056	iproniazid	0.159	5	0.295	---	---	40
1057	pentetic acid	0.137	5	0.295	---	---	40
1058	moxonidine	-0.021	3	-0.295	---	---	33
1059	scopolamine N-oxide	-0.262	5	0.295	---	---	0
1060	risperidone	0.019	3	0.294	---	---	33
1061	PF-00875133-00	0.004	3	0.293	---	---	33
1062	sulfamonomethoxine	-0.013	4	0.292	---	---	25
1063	pimozide	0.01	4	0.291	---	---	25
1064	SR-95639A	0.01	4	0.291	---	---	25
1065	11-deoxy-16,16-dimethylprostaglandin E2	-0.285	4	0.291	---	---	0
1066	piperacetazine	-0.202	4	-0.29	---	---	25
1067	oxprenolol	-0.17	4	-0.29	---	---	25
1068	sulindac	0.088	7	0.29	---	---	28
1069	gemfibrozil	-0.118	5	0.289	---	---	0
1070	practolol	-0.15	4	-0.289	---	---	25
1071	epirizole	-0.098	5	0.289	---	---	20
1072	brompheniramine	-0.049	4	0.289	---	---	25
1073	benfotiamine	-0.09	5	0.289	---	---	20
1074	cobalt chloride	-0.059	3	-0.288	---	---	33
1075	serotonin	-0.048	5	0.288	---	---	20
1076	chlortetracycline	0.028	5	0.288	---	---	20
1077	sulfathiazole	0.016	5	0.288	---	---	20
1078	piperidolate	0.008	3	0.288	---	---	33
1079	H-89	-0.261	3	-0.287	---	---	33
1080	bepridil	-0.002	4	0.286	---	---	25
1081	griseofulvin	-0.121	5	-0.286	---	---	20
1082	azapropazone	0.018	3	0.286	---	---	33
1083	yohimbic acid	-0.033	3	0.286	---	---	33
1084	ciclosporin	0.055	6	0.285	---	---	33
1085	eucatropine	-0.027	6	0.284	---	---	16
1086	valproic acid	0.09	57	0.284	---	---	36
1087	ciprofloxacin	0.038	5	0.284	---	---	40
1088	trimethylcolchicinic acid	0.007	4	0.284	---	---	25
1089	cefmetazole	0.031	4	0.284	---	---	25
1090	sulfamerazine	-0.264	5	-0.283	---	---	40
1091	pivampicillin	0.01	4	0.282	---	---	25
1092	SB-203580	0.121	5	0.282	---	---	40
1093	pergolide	-0.2	4	-0.281	---	---	25
1094	sulfametoxydiazine	-0.022	4	0.281	---	---	25
1095	sulfaphenazole	0.028	4	0.281	---	---	25
1096	gabapentin	-0.036	4	0.281	---	---	25
1097	naproxen	0.207	9	0.281	---	---	44
1098	metformin	0.089	10	0.28	---	---	40
1099	PHA-00767505E	0.054	4	0.28	---	---	25
1100	terazosin	0.04	4	0.28	---	---	25
1101	felodipine	-0.02	7	0.28	---	---	14
1102	difenidol	0.007	3	0.28	---	---	33
1103	sodium phenylbutyrate	0.202	7	0.28	---	---	42
1104	talampicillin	-0.034	4	0.28	---	---	25
1105	clonidine	-0.183	4	-0.279	---	---	25
1106	tetramisole	-0.029	4	-0.279	---	---	25
1107	diloxanide	-0.019	4	0.278	---	---	25
1108	midecamycin	0.021	5	0.278	---	---	40
1109	carbarsone	0.012	4	0.278	---	---	25
1110	dimenhydrinate	0.061	4	0.278	---	---	25
1111	prednisone	-0.157	5	0.278	---	---	20
1112	proscillaridin	0.045	3	0.277	---	---	33
1113	tomatidine	-0.193	4	-0.277	---	---	25
1114	desoxycortone	-0.154	4	0.276	---	---	25
1115	biperiden	-0.019	5	0.276	---	---	20
1116	cefotaxime	0.017	5	0.276	---	---	40
1117	harmaline	0.009	4	0.276	---	---	25
1118	naloxone	-0.139	6	-0.276	---	---	33
1119	piracetam	-0.159	4	-0.276	---	---	25
1120	aminohippuric acid	-0.022	4	0.275	---	---	25
1121	lobelanidine	-0.015	4	0.273	---	---	25
1122	benfluorex	-0.127	4	0.273	---	---	25
1123	ethaverine	-0.186	4	0.273	---	---	0
1124	mefenamic acid	0.034	5	0.273	---	---	20
1125	nalbuphine	-0.135	5	0.273	---	---	20
1126	fluorocurarine	0.005	4	0.272	---	---	25
1127	sulfadimidine	-0.167	6	0.271	---	---	16
1128	canrenoic acid	-0.168	4	-0.271	---	---	25
1129	debrisoquine	0.044	4	0.271	---	---	25
1130	guanfacine	-0.146	5	-0.27	---	---	20
1131	aztreonam	0.005	5	0.27	---	---	20
1132	3-hydroxy-DL-kynurenine	0.084	6	0.269	---	---	33
1133	ikarugamycin	-0.218	3	-0.269	---	---	33
1134	6-bromoindirubin-3'-oxime	-0.233	7	-0.269	---	---	42
1135	kawain	-0.116	5	-0.268	---	---	40
1136	levopropoxyphene	0.004	4	0.268	---	---	25
1137	metrifonate	0.144	5	0.267	---	---	40
1138	fluspirilene	-0.197	4	0.267	---	---	0
1139	daunorubicin	-0.008	4	0.267	---	---	25
1140	isotretinoin	-0.172	4	0.266	---	---	0
1141	raloxifene	0.126	7	0.265	---	---	28
1142	etanidazole	-0.135	4	0.265	---	---	25
1143	piromidic acid	-0.013	4	-0.265	---	---	25
1144	cyclizine	-0.165	4	-0.264	---	---	25
1145	theobromine	0.039	4	0.264	---	---	25
1146	monocrotaline	0.041	4	0.264	---	---	25
1147	benzamil	-0.052	6	0.264	---	---	33
1148	PNU-0293363	-0.063	3	-0.264	---	---	33
1149	doxycycline	0.024	5	0.263	---	---	20
1150	piribedil	-0.155	4	0.263	---	---	0
1151	chlorpropamide	-0.138	6	-0.261	---	---	33
1152	ergocalciferol	-0.044	4	0.261	---	---	25
1153	methotrexate	-0.176	8	-0.261	---	---	25
1154	droperidol	-0.034	4	0.261	---	---	25
1155	pyrvinium	-0.08	6	0.26	---	---	16
1156	amprolium	-0.004	5	0.26	---	---	20
1157	pivmecillinam	-0.008	4	0.26	---	---	25
1158	proglumide	-0.007	5	0.26	---	---	20
1159	pyrimethamine	-0.016	5	0.26	---	---	20
1160	clorsulon	0.04	4	0.259	---	---	25
1161	delsoline	0.022	4	0.259	---	---	25
1162	antimycin A	-0.04	5	-0.259	---	---	40
1163	diflunisal	-0.139	5	-0.259	---	---	40
1164	semustine	-0.035	4	0.259	---	---	25
1165	terguride	-0.002	8	0.258	---	---	25
1166	cefsulodin	0.006	4	0.257	---	---	25
1167	SB-202190	-0.246	5	-0.257	---	---	40
1168	amiloride	-0.133	5	-0.256	---	---	40
1169	cefazolin	-0.003	5	-0.255	---	---	40
1170	ramipril	-0.033	4	0.255	---	---	25
1171	glipizide	-0.187	5	-0.254	---	---	40
1172	nicergoline	0.015	5	0.254	---	---	40
1173	phenformin	0.009	7	0.254	---	---	14
1174	troleandomycin	-0.177	4	0.253	---	---	25
1175	atractyloside	-0.118	5	-0.253	---	---	40
1176	cefoxitin	-0.026	4	0.253	---	---	25
1177	monobenzone	-0.19	4	-0.252	---	---	25
1178	iopanoic acid	-0.045	4	0.251	---	---	25
1179	aceclofenac	-0.159	4	-0.25	---	---	25
1180	nitrendipine	-0.105	5	0.249	---	---	20
1181	khellin	0.017	5	0.249	---	---	20
1182	loracarbef	-0.061	4	0.249	---	---	25
1183	ascorbic acid	-0.014	4	0.248	---	---	25
1184	ribostamycin	-0.004	4	0.248	---	---	25
1185	diltiazem	-0.046	5	0.248	---	---	40
1186	thioproperazine	-0.127	5	-0.247	---	---	20
1187	quercetin	-0.022	6	-0.246	---	---	16
1188	triamcinolone	-0.251	5	-0.246	---	---	40
1189	methapyrilene	-0.044	4	-0.246	---	---	25
1190	labetalol	-0.01	4	-0.246	---	---	25
1191	trapidil	-0.233	3	-0.245	---	---	33
1192	LY-294002	-0.242	61	-0.245	---	---	44
1193	aminophylline	-0.035	4	0.245	---	---	25
1194	BCB000040	0.02	4	0.245	---	---	25
1195	dantrolene	0.08	6	0.245	---	---	33
1196	nilutamide	0.023	4	0.245	---	---	25
1197	suloctidil	-0.046	4	-0.243	---	---	25
1198	ethisterone	0.008	6	0.243	---	---	33
1199	corbadrine	-0.114	4	0.243	---	---	25
1200	etamsylate	-0.171	4	0.243	---	---	0
1201	strophanthidin	0.038	4	0.242	---	---	25
1202	naringin	-0.123	4	0.242	---	---	25
1203	Prestwick-1100	0.016	4	0.241	---	---	25
1204	erythromycin	0.111	5	0.241	---	---	40
1205	solanine	-0.307	4	0.24	---	---	0
1206	cefalexin	-0.213	5	-0.24	---	---	40
1207	chloroquine	-0.033	4	-0.239	---	---	25
1208	miconazole	0.014	5	0.239	---	---	20
1209	alfuzosin	-0.152	5	0.238	---	---	0
1210	cyproheptadine	-0.017	5	-0.238	---	---	20
1211	isoxicam	0.113	5	0.238	---	---	40
1212	mephentermine	-0.141	5	-0.238	---	---	40
1213	terbutaline	0.016	4	0.238	---	---	25
1214	bicuculline	0.029	4	0.237	---	---	25
1215	trifluoperazine	-0.194	16	-0.237	---	---	43
1216	PF-00539758-00	0.001	3	0.235	---	---	33
1217	tetracycline	-0.141	5	-0.235	---	---	40
1218	ramifenazone	-0.003	4	-0.235	---	---	25
1219	lorglumide	-0.252	5	-0.232	---	---	40
1220	arcaine	-0.017	4	0.232	---	---	25
1221	spiradoline	-0.072	4	-0.232	---	---	25
1222	hyoscyamine	-0.02	5	0.231	---	---	20
1223	cinnarizine	-0.026	4	0.23	---	---	25
1224	propafenone	-0.046	4	-0.228	---	---	25
1225	heliotrine	-0.064	6	0.228	---	---	16
1226	sulfaguanidine	-0.124	5	0.228	---	---	20
1227	cyclobenzaprine	0.006	4	0.227	---	---	25
1228	10-methoxyharmalan	-0.009	4	-0.227	---	---	25
1229	equilin	-0.127	5	-0.226	---	---	40
1230	ambroxol	-0.164	4	-0.226	---	---	25
1231	nordihydroguaiaretic acid	-0.242	15	-0.226	---	---	46
1232	salbutamol	-0.24	5	-0.225	---	---	40
1233	hesperetin	0.002	5	0.224	---	---	40
1234	ivermectin	-0.138	5	-0.224	---	---	40
1235	nipecotic acid	-0.013	4	0.224	---	---	25
1236	levothyroxine sodium	-0.068	4	0.224	---	---	25
1237	clorgiline	0.003	4	0.224	---	---	25
1238	tetracaine	-0.014	3	0.222	---	---	33
1239	perphenazine	0.094	5	0.222	---	---	40
1240	cyproterone	-0.108	4	0.221	---	---	25
1241	mepenzolate bromide	-0.165	5	0.221	---	---	20
1242	paclitaxel	-0.009	6	0.219	---	---	33
1243	CP-319743	-0.008	4	-0.218	---	---	25
1244	dicycloverine	-0.132	5	0.218	---	---	20
1245	norethisterone	-0.146	4	0.218	---	---	25
1246	ranitidine	-0.162	5	-0.217	---	---	40
1247	fenoprofen	-0.127	6	0.217	---	---	16
1248	digoxin	0.029	4	0.216	---	---	25
1249	clenbuterol	-0.104	5	-0.216	---	---	40
1250	clofazimine	-0.005	5	0.215	---	---	40
1251	cinoxacin	-0.041	4	0.215	---	---	25
1252	nafcillin	0.01	4	0.213	---	---	25
1253	mesalazine	0.074	5	0.213	---	---	40
1254	corticosterone	-0.046	4	0.213	---	---	25
1255	dipyridamole	-0.085	6	0.212	---	---	16
1256	foliosidine	0.016	6	0.212	---	---	16
1257	isocarboxazid	-0.118	5	0.211	---	---	20
1258	triprolidine	-0.024	4	0.209	---	---	25
1259	alverine	-0.016	4	0.208	---	---	25
1260	cycloserine	-0.104	4	0.207	---	---	25
1261	levobunolol	-0.062	4	-0.207	---	---	25
1262	2,6-dimethylpiperidine	-0.132	5	-0.207	---	---	40
1263	spiramycin	0.034	6	0.206	---	---	16
1264	triamterene	-0.144	5	-0.205	---	---	40
1265	chlorpromazine	-0.157	19	-0.205	---	---	42
1266	tamoxifen	0.031	7	0.204	---	---	28
1267	mexiletine	-0.035	6	-0.203	---	---	16
1268	amrinone	-0.049	4	-0.202	---	---	25
1269	acetylsalicylic acid	0.022	13	0.202	---	---	30
1270	hydroflumethiazide	-0.136	5	-0.201	---	---	40
1271	halcinonide	-0.121	5	-0.201	---	---	40
1272	merbromin	-0.019	5	-0.201	---	---	20
1273	metoclopramide	0.096	6	0.2	---	---	33
1274	PF-00562151-00	0.002	8	0.2	---	---	25
1275	meclofenamic acid	0.062	5	-0.198	---	---	20
1276	sulfinpyrazone	-0.031	4	0.197	---	---	25
1277	hydroxyzine	-0.117	5	-0.196	---	---	40
1278	minoxidil	-0.006	5	-0.196	---	---	20
1279	sirolimus	-0.275	44	-0.195	---	---	47
1280	atropine oxide	-0.146	5	-0.19	---	---	40
1281	lycorine	-0.023	5	0.19	---	---	20
1282	pioglitazone	-0.024	11	0.189	---	---	27
1283	acetazolamide	0.014	4	0.188	---	---	25
1284	dizocilpine	-0.153	5	-0.187	---	---	40
1285	glycopyrronium bromide	-0.05	5	-0.185	---	---	20
1286	genistein	-0.09	17	0.184	---	---	29
1287	orphenadrine	-0.097	6	0.183	---	---	16
1288	cytisine	-0.039	4	-0.183	---	---	25
1289	sulfanilamide	-0.131	4	0.183	---	---	25
1290	PHA-00745360	-0.086	8	-0.182	---	---	37
1291	loperamide	-0.075	6	-0.181	---	---	33
1292	pheniramine	-0.122	5	0.18	---	---	20
1293	amodiaquine	0.001	4	0.178	---	---	25
1294	mianserin	-0.144	5	-0.175	---	---	40
1295	colchicine	-0.099	6	0.166	---	---	16
1296	dicoumarol	0.008	6	0.163	---	---	33
1297	chlorcyclizine	-0.029	6	0.163	---	---	33
1298	fluphenazine	-0.176	18	-0.162	---	---	38
1299	0175029-0000	-0.111	6	0.16	---	---	16
1300	nitrofurantoin	-0.132	5	0.159	---	---	20
1301	iocetamic acid	-0.004	4	-0.157	---	---	25
1302	tretinoin	-0.208	22	0.156	---	---	13
1303	rosiglitazone	-0.07	14	-0.152	---	---	28
1304	clozapine	-0.023	17	0.142	---	---	29
1305	wortmannin	-0.057	18	-0.137	---	---	27
1306	haloperidol	0.03	32	0.136	---	---	31
1307	troglitazone	-0.137	16	-0.127	---	---	37
1308	estradiol	-0.073	37	-0.108	---	---	35
1309	fulvestrant	-0.115	40	-0.099	---	---	40

## Sheet: by cmap name and cell line
rank	cmap name and cell line	mean	n	enrichment	p	specificity	percent non-null
1	trichostatin A - PC3	-0.658	55	-0.618	0	0.1954	92
2	tanespimycin - MCF7	-0.432	36	-0.476	0	0.2131	61
3	trichostatin A - MCF7	-0.53	92	-0.474	0	0.3663	78
4	geldanamycin - MCF7	-0.517	10	-0.595	0.00062	0.1053	80
5	etynodiol - MCF7	0.833	2	0.978	0.00082	0.0055	100
6	amiprilose - MCF7	-0.815	2	-0.976	0.00127	0.0055	100
7	vorinostat - MCF7	-0.66	7	-0.641	0.00232	0.3398	85
8	15-delta prostaglandin J2 - MCF7	-0.548	8	-0.604	0.00251	0.1379	75
9	scriptaid - PC3	-0.839	2	-0.962	0.00322	0.0106	100
10	LY-294002 - PC3	-0.49	12	-0.49	0.00355	0.2249	75
11	MG-262 - PC3	-0.857	2	-0.959	0.0037	0.1148	100
12	pepstatin - MCF7	0.752	2	0.952	0.0041	0	100
13	nadide - MCF7	0.744	2	0.949	0.00481	0	100
14	dexamethasone - MCF7	-0.683	4	-0.776	0.00513	0.0118	100
15	amitriptyline - MCF7	0.721	3	0.858	0.00535	0.005	100
16	etiocholanolone - MCF7	0.681	3	0.856	0.00577	0.0062	100
17	sodium phenylbutyrate - MCF7	0.686	3	0.851	0.00619	0.0237	100
18	aciclovir - PC3	0.793	2	0.941	0.0066	0.0058	100
19	orlistat - MCF7	-0.751	3	-0.848	0.00689	0.0062	100
20	0297417-0002B - MCF7	-0.806	2	-0.942	0.00732	0.0444	100
21	CP-863187 - MCF7	0.762	2	0.936	0.00785	0.0064	100
22	tridihexethyl - MCF7	0.724	2	0.935	0.00803	0.0069	100
23	Prestwick-559 - MCF7	-0.801	2	-0.937	0.00847	0.0177	100
24	myosmine - MCF7	0.738	3	0.838	0.00853	0.0071	100
25	monorden - MCF7	-0.388	12	-0.453	0.00866	0.1324	66
26	dosulepin - MCF7	0.724	2	0.931	0.00915	0.0107	100
27	lincomycin - MCF7	0.783	2	0.929	0.00962	0.008	100
28	naringenin - MCF7	0.718	2	0.928	0.01006	0.0765	100
29	withaferin A - PC3	-0.779	2	-0.93	0.01028	0.075	100
30	carbachol - MCF7	-0.772	2	-0.928	0.01072	0	100
31	15(S)-15-methylprostaglandin E2 - PC3	0.763	2	0.925	0.01084	0.0474	100
32	flucytosine - MCF7	-0.783	2	-0.927	0.01097	0.0061	100
33	nadolol - MCF7	0.784	2	0.924	0.01107	0.0262	100
34	thioridazine - MCF7	-0.422	11	-0.463	0.01121	0.2062	63
35	atracurium besilate - MCF7	0.717	2	0.922	0.01217	0.0172	100
36	vinblastine - MCF7	0.735	2	0.921	0.01223	0.0118	100
37	captopril - MCF7	0.713	2	0.921	0.01233	0.0065	100
38	fenbendazole - PC3	-0.817	2	-0.922	0.01247	0.0083	100
39	Prestwick-1103 - MCF7	0.753	2	0.92	0.01264	0.0115	100
40	pyrantel - MCF7	0.756	2	0.919	0.01298	0	100
41	Prestwick-664 - PC3	-0.762	2	-0.918	0.01368	0.018	100
42	moracizine - MCF7	0.736	2	0.917	0.01374	0.006	100
43	harman - MCF7	-0.774	2	-0.915	0.01467	0	100
44	meteneprost - MCF7	0.722	2	0.912	0.01537	0.0059	100
45	tanespimycin - PC3	-0.479	12	-0.426	0.01666	0.3162	75
46	alpha-estradiol - MCF7	-0.522	9	-0.488	0.01673	0.1894	77
47	fludroxycortide - PC3	0.711	2	0.909	0.01696	0.0294	100
48	adiphenine - PC3	0.713	2	0.903	0.01905	0.0725	100
49	azathioprine - MCF7	-0.683	4	-0.689	0.02005	0.0533	100
50	metformin - PC3	0.696	2	0.897	0.02209	0.0179	100
51	promazine - PC3	-0.745	2	-0.894	0.02259	0.0517	100
52	ganciclovir - MCF7	0.754	2	0.891	0.02473	0	100
53	kinetin - MCF7	0.686	2	0.89	0.02495	0	100
54	mycophenolic acid - MCF7	0.708	2	0.888	0.02577	0.1675	100
55	terfenadine - MCF7	-0.773	2	-0.886	0.02612	0.1695	100
56	bergenin - MCF7	-0.746	2	-0.885	0.02642	0.034	100
57	W-13 - MCF7	0.778	2	0.886	0.027	0.0245	100
58	naftidrofuryl - MCF7	0.672	2	0.885	0.02734	0.0062	100
59	ciprofloxacin - PC3	0.676	2	0.884	0.02756	0.0139	100
60	(+)-isoprenaline - MCF7	0.75	2	0.882	0.02831	0.0213	100
61	fenbufen - MCF7	0.465	3	0.757	0.0285	0.0076	66
62	alpha-yohimbine - MCF7	0.705	2	0.881	0.02861	0.0196	100
63	thiamphenicol - PC3	0.733	2	0.881	0.02869	0.082	100
64	indapamide - PC3	-0.739	2	-0.88	0.02875	0.0205	100
65	lymecycline - MCF7	0.674	2	0.878	0.02988	0.0139	100
66	bromperidol - MCF7	-0.725	2	-0.878	0.03004	0.0258	100
67	bumetanide - MCF7	0.711	2	0.877	0.03048	0.1062	100
68	leflunomide - MCF7	0.685	2	0.875	0.03131	0.0375	100
69	tolnaftate - PC3	0.727	2	0.875	0.03179	0.0843	100
70	CP-690334-01 - MCF7	-0.529	4	-0.656	0.03195	0.089	75
71	neostigmine bromide - MCF7	0.669	2	0.874	0.03215	0.0966	100
72	Prestwick-1082 - MCF7	0.673	2	0.871	0.03386	0.0546	100
73	pralidoxime - MCF7	0.691	2	0.87	0.03422	0.0296	100
74	gibberellic acid - MCF7	0.728	2	0.869	0.03493	0.0199	100
75	dacarbazine - MCF7	-0.728	2	-0.867	0.03517	0.0558	100
76	acepromazine - MCF7	-0.779	2	-0.867	0.03541	0.0688	100
77	metanephrine - PC3	0.707	2	0.868	0.03565	0.0352	100
78	noretynodrel - MCF7	-0.715	2	-0.866	0.03575	0.0822	100
79	suramin sodium - MCF7	0.676	2	0.866	0.03678	0.0455	100
80	hydrochlorothiazide - MCF7	0.662	2	0.865	0.03684	0.0247	100
81	dydrogesterone - MCF7	-0.759	2	-0.864	0.03696	0.0427	100
82	sulfapyridine - MCF7	0.677	2	0.865	0.0372	0.0319	100
83	fludrocortisone - MCF7	0.345	5	0.586	0.03739	0.1954	80
84	amitriptyline - PC3	0.655	2	0.864	0.03772	0.0693	100
85	suprofen - MCF7	-0.748	2	-0.862	0.03825	0.0335	100
86	lansoprazole - MCF7	0.654	2	0.862	0.03883	0.05	100
87	sulconazole - MCF7	-0.724	2	-0.861	0.03887	0.069	100
88	prednisolone - MCF7	0.455	3	0.728	0.03948	0.0123	66
89	econazole - MCF7	0.663	2	0.86	0.03976	0.1623	100
90	piperacillin - MCF7	0.451	3	0.727	0.03998	0.0138	66
91	cetirizine - MCF7	-0.721	2	-0.857	0.04072	0.0529	100
92	arachidonyltrifluoromethane - MCF7	0.721	2	0.858	0.04088	0.0377	100
93	16-phenyltetranorprostaglandin E2 - PC3	0.666	2	0.857	0.04151	0.0359	100
94	protoveratrine A - MCF7	-0.84	2	-0.854	0.04241	0.129	100
95	quipazine - MCF7	0.713	2	0.853	0.04354	0.044	100
96	loxapine - MCF7	-0.724	2	-0.852	0.0437	0.0079	100
97	tacrolimus - MCF7	0.421	3	0.718	0.04425	0.0828	66
98	cotinine - MCF7	-0.708	3	-0.722	0.04431	0.0156	100
99	alpha-estradiol - PC3	-0.635	3	-0.721	0.04449	0.0321	100
100	16,16-dimethylprostaglandin E2 - PC3	0.665	2	0.851	0.04455	0.1714	100
101	0317956-0000 - MCF7	-0.425	4	-0.632	0.0446	0.1316	50
102	epitiostanol - MCF7	0.666	2	0.85	0.04529	0.0769	100
103	spironolactone - PC3	0.673	2	0.85	0.04551	0.0301	100
104	karakoline - MCF7	0.481	3	0.713	0.04637	0	66
105	morantel - MCF7	-0.702	2	-0.847	0.04666	0.0245	100
106	pyrantel - PC3	-0.708	2	-0.847	0.04712	0.0766	100
107	heptaminol - PC3	0.638	2	0.847	0.04736	0.092	100
108	3-nitropropionic acid - MCF7	-0.801	2	-0.843	0.04952	0.0419	100
109	blebbistatin - MCF7	-0.717	2	-0.842	0.05012	0.0811	100
110	diflorasone - MCF7	-0.755	2	-0.841	0.05078	0.0331	100
111	lanatoside C - MCF7	-0.602	3	-0.707	0.05132	0.172	100
112	hydrastinine - MCF7	0.653	2	0.84	0.05135	0.0278	100
113	proxymetacaine - MCF7	-0.717	2	-0.839	0.05173	0.026	100
114	sotalol - MCF7	-0.723	2	-0.838	0.05255	0.0168	100
115	folic acid - MCF7	-0.713	2	-0.837	0.05275	0.0897	100
116	erastin - MCF7	-0.732	2	-0.837	0.0531	0.0537	100
117	syrosingopine - MCF7	0.643	2	0.837	0.0533	0.185	100
118	tocainide - MCF7	0.717	2	0.837	0.05338	0.0503	100
119	berberine - MCF7	-0.699	2	-0.836	0.05354	0.0724	100
120	niclosamide - MCF7	-0.736	2	-0.835	0.05432	0.2832	100
121	sirolimus - PC3	-0.458	8	-0.448	0.05544	0.4437	62
122	clemastine - MCF7	0.631	2	0.834	0.05549	0.07	100
123	oleandomycin - PC3	0.655	2	0.833	0.05607	0.0308	100
124	15-delta prostaglandin J2 - PC3	-0.722	3	-0.698	0.05607	0.1644	100
125	harmine - MCF7	-0.697	2	-0.832	0.05622	0.125	100
126	PF-01378883-00 - MCF7	-0.69	2	-0.829	0.0575	0.0872	100
127	cefapirin - MCF7	0.605	2	0.83	0.05789	0.064	100
128	clindamycin - MCF7	-0.724	2	-0.827	0.05887	0.0784	100
129	metampicillin - PC3	0.644	2	0.827	0.06048	0.1243	100
130	cefaclor - MCF7	0.686	2	0.826	0.06112	0.0961	100
131	geldanamycin - HL60	0.365	3	0.686	0.06115	0.1695	66
132	hesperetin - PC3	0.675	2	0.825	0.06217	0.0328	100
133	budesonide - MCF7	-0.697	2	-0.822	0.06261	0.0909	100
134	nordihydroguaiaretic acid - ssMCF7	-0.694	2	-0.822	0.06273	0.044	100
135	nimodipine - MCF7	0.626	2	0.823	0.0631	0.1083	100
136	thalidomide - MCF7	0.378	4	0.604	0.0636	0.0136	75
137	mesoridazine - MCF7	-0.727	2	-0.821	0.06362	0.0722	100
138	SC-19220 - PC3	0.624	2	0.822	0.0643	0.0599	100
139	denatonium benzoate - MCF7	-0.697	2	-0.82	0.06444	0.0621	100
140	meglumine - MCF7	0.615	2	0.82	0.06521	0.0621	100
141	nalidixic acid - PC3	-0.686	2	-0.819	0.06525	0.0637	100
142	etilefrine - MCF7	0.664	2	0.82	0.06543	0.0449	100
143	prochlorperazine - MCF7	-0.403	9	-0.414	0.06548	0.3333	55
144	etoposide - MCF7	0.699	2	0.819	0.06601	0.2865	100
145	ranitidine - PC3	-0.73	2	-0.817	0.06619	0.1024	100
146	benzathine benzylpenicillin - MCF7	0.687	2	0.819	0.06644	0.1307	100
147	oxamniquine - MCF7	0.597	2	0.817	0.06762	0.0738	100
148	epivincamine - MCF7	-0.716	2	-0.815	0.06776	0.0417	100
149	sulindac - PC3	0.617	2	0.816	0.06893	0.1183	100
150	midodrine - PC3	0.635	2	0.815	0.06901	0.1186	100
151	kanamycin - MCF7	-0.673	2	-0.811	0.07074	0.0549	100
152	isoniazid - MCF7	0.633	2	0.812	0.07183	0.025	100
153	cloxacillin - MCF7	0.632	2	0.81	0.07304	0.0898	100
154	citiolone - PC3	-0.684	2	-0.807	0.07388	0.1134	100
155	monensin - PC3	0.659	2	0.809	0.07432	0.162	100
156	metolazone - MCF7	0.59	2	0.808	0.07481	0.0872	100
157	triamterene - MCF7	-0.68	2	-0.805	0.07507	0.0278	100
158	ouabain - MCF7	-0.686	2	-0.803	0.07623	0.2316	100
159	hydroflumethiazide - MCF7	-0.697	2	-0.801	0.0776	0.1475	100
160	sulfamethoxypyridazine - MCF7	-0.601	3	-0.661	0.07778	0.148	100
161	halcinonide - MCF7	-0.662	2	-0.801	0.07782	0.0504	100
162	suramin sodium - PC3	0.697	2	0.804	0.07819	0.1395	100
163	isoxicam - PC3	0.598	2	0.804	0.07835	0.2333	100
164	naproxen - HL60	0.564	2	0.802	0.07941	0.0884	100
165	penbutolol - MCF7	0.629	2	0.802	0.07967	0.0979	100
166	aciclovir - MCF7	0.39	3	0.659	0.07968	0.1135	66
167	betulinic acid - MCF7	0.628	2	0.8	0.08068	0.1111	100
168	3-acetamidocoumarin - MCF7	0.614	2	0.798	0.08185	0.1524	100
169	5224221 - MCF7	-0.67	2	-0.791	0.08495	0.2632	100
170	nomifensine - MCF7	-0.748	2	-0.791	0.08571	0.0968	100
171	minocycline - MCF7	0.373	3	0.651	0.08583	0.0488	66
172	isocarboxazid - MCF7	-0.707	2	-0.79	0.08601	0.0823	100
173	procainamide - MCF7	-0.655	2	-0.79	0.08617	0.1436	100
174	thiostrepton - MCF7	-0.659	2	-0.79	0.08646	0.2076	100
175	calcium folinate - MCF7	0.531	2	0.793	0.08648	0.2	100
176	alvespimycin - MCF7	-0.421	7	-0.446	0.08722	0.375	71
177	mimosine - MCF7	0.531	2	0.791	0.08796	0.0606	100
178	oxedrine - MCF7	0.609	2	0.79	0.08845	0.0252	100
179	alpha-ergocryptine - MCF7	-0.464	3	-0.647	0.08875	0.0816	66
180	ondansetron - MCF7	0.604	2	0.789	0.08969	0.1105	100
181	Prestwick-860 - MCF7	-0.693	2	-0.784	0.09096	0.1216	100
182	metronidazole - MCF7	0.584	2	0.786	0.09207	0.2143	100
183	vorinostat - PC3	-0.679	2	-0.783	0.09265	0.2889	100
184	thiamazole - MCF7	-0.345	3	-0.642	0.09284	0.1678	66
185	bacampicillin - MCF7	0.656	2	0.785	0.09285	0.1695	100
186	gallamine triethiodide - MCF7	-0.665	2	-0.782	0.09326	0.0815	100
187	acenocoumarol - MCF7	0.599	2	0.783	0.09478	0.1189	100
188	zimeldine - PC3	-0.725	2	-0.78	0.09527	0.0985	100
189	probenecid - MCF7	0.607	2	0.782	0.09529	0.0701	100
190	viomycin - MCF7	0.662	2	0.782	0.09575	0.175	100
191	thiocolchicoside - MCF7	-0.726	2	-0.779	0.09589	0.1056	100
192	5707885 - PC3	-0.755	2	-0.779	0.09629	0.2016	100
193	mianserin - PC3	-0.707	2	-0.775	0.09947	0.1709	100
194	tranylcypromine - PC3	-0.682	2	-0.775	0.09961	0.1837	100
195	ricinine - MCF7	-0.705	2	-0.775	0.09986	0.1164	100
196	tinidazole - PC3	-0.675	2	-0.773	0.10171	0.0588	100
197	benzylpenicillin - MCF7	-0.677	2	-0.771	0.10374	0.1011	100
198	methoxamine - MCF7	0.357	2	0.773	0.10406	0.1921	50
199	propylthiouracil - MCF7	-0.735	2	-0.77	0.10432	0.1421	100
200	paromomycin - MCF7	-0.667	2	-0.769	0.10525	0.0612	100
201	0225151-0000 - PC3	-0.711	2	-0.768	0.10629	0.0822	100
202	meropenem - MCF7	-0.722	2	-0.765	0.10849	0.093	100
203	terconazole - MCF7	-0.696	2	-0.765	0.10865	0.0987	100
204	trazodone - MCF7	-0.728	2	-0.765	0.10875	0.2291	100
205	cyclopenthiazide - MCF7	0.356	2	0.767	0.10967	0.0403	50
206	rotenone - MCF7	-0.685	2	-0.762	0.11088	0.1533	100
207	rottlerin - MCF7	-0.459	3	-0.624	0.11119	0.2269	66
208	aztreonam - PC3	0.318	2	0.764	0.11197	0.0974	50
209	acetylsalicylsalicylic acid - MCF7	-0.664	2	-0.761	0.11221	0.1814	100
210	pentolonium - PC3	-0.635	2	-0.761	0.11261	0.1145	100
211	hexestrol - MCF7	-0.652	2	-0.759	0.11396	0.1716	100
212	salsolidin - MCF7	-0.691	2	-0.758	0.11585	0.1941	100
213	Prestwick-642 - MCF7	0.289	2	0.759	0.11651	0.1954	50
214	florfenicol - MCF7	0.33	2	0.757	0.11879	0.2353	50
215	diclofenac - MCF7	-0.397	3	-0.617	0.1188	0.0875	66
216	ofloxacin - PC3	-0.656	2	-0.755	0.11883	0.1271	100
217	nitrofurantoin - PC3	-0.674	2	-0.754	0.11943	0.0941	100
218	sulfamethoxazole - MCF7	0.323	2	0.756	0.11965	0.0539	50
219	santonin - MCF7	-0.67	2	-0.753	0.12068	0.1098	100
220	bendroflumethiazide - MCF7	-0.415	3	-0.616	0.12076	0.1685	66
221	halcinonide - PC3	0.361	2	0.752	0.12283	0.1544	50
222	guaifenesin - MCF7	-0.476	3	-0.614	0.12367	0.1845	66
223	pheniramine - MCF7	0.355	2	0.751	0.12408	0.2174	50
224	azathioprine - PC3	0.386	2	0.75	0.12428	0.15	50
225	Prestwick-1084 - MCF7	-0.628	2	-0.748	0.12525	0.2475	100
226	8-azaguanine - MCF7	-0.624	2	-0.748	0.12569	0.2387	100
227	0175029-0000 - MCF7	0.341	2	0.748	0.12645	0.2512	50
228	PHA-00851261E - PC3	-0.384	4	-0.542	0.1266	0.2359	75
229	glibenclamide - MCF7	-0.645	2	-0.746	0.1276	0.1554	100
230	withaferin A - MCF7	-0.622	2	-0.746	0.12804	0.3008	100
231	aminophylline - MCF7	0.357	2	0.745	0.12891	0.1316	50
232	deferoxamine - MCF7	-0.44	5	-0.486	0.12949	0.2298	60
233	trifluridine - MCF7	0.297	2	0.744	0.13022	0.2391	50
234	morantel - PC3	-0.717	2	-0.74	0.13356	0.16	100
235	rotenone - PC3	-0.631	2	-0.74	0.13378	0.227	100
236	dicloxacillin - MCF7	0.481	2	0.74	0.13418	0.2656	50
237	dihydroergotamine - MCF7	-0.685	2	-0.739	0.13452	0.0878	100
238	chlorpromazine - PC3	-0.321	4	-0.535	0.13513	0.2185	50
239	streptozocin - MCF7	0.374	2	0.739	0.13599	0.078	50
240	orphenadrine - PC3	-0.642	2	-0.738	0.13629	0.1923	100
241	mebeverine - MCF7	0.334	2	0.737	0.13734	0.0949	50
242	velnacrine - MCF7	0.41	2	0.737	0.1376	0.1379	50
243	isocorydine - MCF7	-0.671	2	-0.737	0.13764	0.1386	100
244	hydrocotarnine - MCF7	-0.645	2	-0.737	0.1378	0.2529	100
245	meticrane - PC3	-0.622	2	-0.736	0.13849	0.3568	100
246	bucladesine - MCF7	0.342	4	0.531	0.13861	0.0861	50
247	amylocaine - PC3	-0.64	2	-0.735	0.13893	0.1177	100
248	metaraminol - PC3	0.375	2	0.735	0.13933	0.2424	50
249	sulfaguanidine - MCF7	-0.623	2	-0.734	0.14052	0.1264	100
250	scopolamine N-oxide - PC3	-0.656	2	-0.733	0.14148	0.2676	100
251	mephenytoin - MCF7	0.352	2	0.733	0.14179	0.1163	50
252	clebopride - MCF7	0.265	2	0.732	0.14237	0.1714	50
253	clofibrate - MCF7	-0.624	2	-0.732	0.14289	0.0544	100
254	flavoxate - MCF7	0.341	2	0.731	0.14422	0.0473	50
255	Prestwick-665 - MCF7	-0.618	2	-0.73	0.145	0.18	100
256	phenelzine - MCF7	-0.462	3	-0.597	0.14508	0.1404	66
257	bromopride - MCF7	0.445	3	0.598	0.1452	0.0828	66
258	hesperetin - MCF7	-0.67	2	-0.729	0.14557	0.1734	100
259	cyanocobalamin - MCF7	0.462	2	0.729	0.14671	0.031	50
260	pheneticillin - MCF7	0.33	2	0.728	0.14712	0.1606	50
261	rifabutin - MCF7	-0.625	2	-0.727	0.14756	0.2984	100
262	anabasine - MCF7	0.343	2	0.728	0.1478	0.1333	50
263	phenazopyridine - MCF7	0.306	2	0.727	0.14863	0.1742	50
264	milrinone - MCF7	0.339	2	0.727	0.14889	0.2105	50
265	Prestwick-1080 - PC3	-0.613	2	-0.725	0.14975	0.1879	100
266	SB-203580 - MCF7	0.428	3	0.595	0.14979	0.3851	66
267	PNU-0251126 - MCF7	0.357	2	0.725	0.15154	0.259	50
268	naloxone - MCF7	-0.278	3	-0.592	0.15197	0.1988	66
269	CP-944629 - MCF7	0.373	2	0.723	0.15331	0.1243	50
270	luteolin - MCF7	-0.598	2	-0.722	0.15386	0.25	100
271	fludroxycortide - MCF7	0.336	2	0.722	0.15404	0.0533	50
272	mefloquine - PC3	-0.608	2	-0.721	0.15482	0.2759	100
273	midodrine - MCF7	-0.655	2	-0.721	0.15502	0.2	100
274	gossypol - MCF7	-0.317	3	-0.59	0.15518	0.2979	66
275	phenylpropanolamine - MCF7	-0.63	2	-0.72	0.15561	0.1592	100
276	emetine - MCF7	-0.65	2	-0.72	0.15587	0.4556	100
277	PF-00539745-00 - PC3	0.314	2	0.72	0.15623	0.2457	50
278	cimetidine - PC3	0.311	2	0.72	0.15631	0.12	50
279	fluticasone - MCF7	0.438	2	0.719	0.15748	0.3257	50
280	ritodrine - MCF7	-0.62	2	-0.717	0.15979	0.2527	100
281	edrophonium chloride - MCF7	0.406	2	0.715	0.16213	0.0588	50
282	chlorhexidine - PC3	0.3	2	0.715	0.16221	0.1264	50
283	diethylcarbamazine - MCF7	0.347	2	0.714	0.16327	0.0213	50
284	isoxsuprine - PC3	0.397	2	0.713	0.16368	0.1687	50
285	amiloride - MCF7	-0.668	2	-0.713	0.16448	0.1832	100
286	estropipate - MCF7	0.463	2	0.712	0.16543	0.2765	50
287	iobenguane - MCF7	0.35	2	0.712	0.16567	0.0382	50
288	ionomycin - MCF7	-0.465	3	-0.583	0.16609	0.2787	66
289	ellipticine - MCF7	-0.588	2	-0.71	0.16734	0.4179	100
290	pheniramine - PC3	-0.661	2	-0.71	0.16754	0.1083	100
291	oxaprozin - MCF7	-0.531	4	-0.51	0.16945	0.3028	75
292	apigenin - MCF7	-0.607	2	-0.709	0.16957	0.4329	100
293	tacrine - MCF7	0.295	2	0.708	0.16999	0.0701	50
294	nocodazole - PC3	-0.656	2	-0.708	0.17046	0.25	100
295	adipiodone - MCF7	-0.644	2	-0.707	0.17086	0.2772	100
296	pregnenolone - MCF7	0.245	2	0.706	0.17275	0.3575	50
297	rolitetracycline - MCF7	-0.636	2	-0.705	0.17398	0.2914	100
298	allantoin - PC3	0.276	2	0.705	0.17402	0.0867	50
299	albendazole - MCF7	-0.651	2	-0.704	0.1746	0.227	100
300	N-acetylmuramic acid - MCF7	0.381	2	0.704	0.17557	0.0946	50
301	ornidazole - MCF7	-0.578	2	-0.703	0.17597	0.1788	100
302	trimetazidine - MCF7	-0.693	2	-0.703	0.17661	0.3423	100
303	tiabendazole - MCF7	-0.647	2	-0.702	0.17693	0.2365	100
304	corynanthine - MCF7	-0.692	2	-0.702	0.17748	0.25	100
305	fluocinonide - PC3	0.36	2	0.7	0.17915	0.2517	50
306	metamizole sodium - MCF7	-0.414	3	-0.575	0.17923	0.326	66
307	metaraminol - MCF7	0.293	2	0.7	0.18003	0.0775	50
308	lidocaine - MCF7	0.423	2	0.699	0.18086	0.3054	50
309	trichlormethiazide - MCF7	-0.628	2	-0.699	0.18104	0.1921	100
310	mianserin - MCF7	0.347	2	0.699	0.1813	0.1282	50
311	benzthiazide - MCF7	-0.582	2	-0.699	0.18162	0.367	100
312	idoxuridine - PC3	0.356	2	0.697	0.18281	0.2161	50
313	cyproterone - MCF7	-0.606	2	-0.697	0.18351	0.335	100
314	guanabenz - PC3	0.397	2	0.697	0.18374	0.3448	50
315	genistein - PC3	-0.489	3	-0.572	0.18406	0.3252	66
316	guaifenesin - PC3	-0.634	2	-0.696	0.1849	0.3216	100
317	homosalate - PC3	-0.731	2	-0.695	0.18579	0.2515	100
318	11-deoxy-16,16-dimethylprostaglandin E2 - MCF7	-0.57	2	-0.694	0.18633	0.1813	100
319	N-acetyl-L-leucine - MCF7	-0.685	2	-0.694	0.18699	0.2737	100
320	corbadrine - MCF7	-0.652	2	-0.693	0.18782	0.25	100
321	ranitidine - MCF7	0.325	2	0.693	0.18834	0.1635	50
322	fluphenazine - MCF7	-0.243	10	-0.327	0.18893	0.3689	50
323	zaprinast - MCF7	0.423	2	0.692	0.18897	0.1159	50
324	estradiol - ssMCF7	0.339	2	0.691	0.1905	0.236	50
325	butoconazole - MCF7	-0.613	2	-0.69	0.19124	0.2273	100
326	pyrithyldione - MCF7	0.452	2	0.69	0.19194	0.3412	50
327	azacitidine - MCF7	-0.572	2	-0.69	0.19213	0.3636	100
328	epirizole - PC3	0.366	2	0.689	0.19249	0.0612	50
329	AG-028671 - PC3	0.319	2	0.689	0.19319	0.2044	50
330	tretinoin - PC3	-0.559	4	-0.495	0.1933	0.3161	75
331	nifuroxazide - MCF7	-0.628	2	-0.688	0.19462	0.2714	100
332	ifosfamide - MCF7	0.349	2	0.688	0.19478	0.1135	50
333	sulpiride - MCF7	0.264	2	0.687	0.19514	0.1732	50
334	pentoxifylline - PC3	0.333	2	0.687	0.19546	0.467	50
335	nalbuphine - PC3	0.344	2	0.685	0.1982	0.2687	50
336	naltrexone - MCF7	0.358	2	0.684	0.1987	0.1753	50
337	rescinnamine - MCF7	-0.586	2	-0.684	0.19903	0.3864	100
338	dropropizine - MCF7	0.411	2	0.684	0.19925	0.2517	50
339	tetroquinone - MCF7	-0.618	2	-0.684	0.19997	0.3245	100
340	pancuronium bromide - MCF7	-0.539	2	-0.682	0.2014	0.3568	100
341	aminophenazone - PC3	0.415	2	0.682	0.20194	0.1218	50
342	gramine - MCF7	-0.616	2	-0.682	0.20194	0.3622	100
343	depudecin - MCF7	0.312	2	0.681	0.20329	0.1125	50
344	chenodeoxycholic acid - MCF7	0.326	2	0.68	0.20476	0.2647	50
345	vanoxerine - MCF7	0.326	2	0.679	0.20532	0.2955	50
346	trifluoperazine - PC3	-0.473	3	-0.56	0.20561	0.3966	66
347	0198306-0000 - PC3	-0.618	2	-0.677	0.20824	0.3048	100
348	telenzepine - MCF7	0.295	2	0.677	0.20876	0.1258	50
349	primaquine - MCF7	-0.605	2	-0.677	0.20935	0.3036	100
350	eldeline - PC3	-0.538	2	-0.676	0.20957	0.3802	100
351	promazine - MCF7	-0.402	3	-0.557	0.21038	0.1494	66
352	levcycloserine - PC3	-0.613	2	-0.674	0.21235	0.2634	100
353	cefazolin - PC3	-0.602	2	-0.674	0.21329	0.2542	100
354	Prestwick-1100 - MCF7	0.372	2	0.673	0.21339	0.1373	50
355	mefenamic acid - PC3	0.421	2	0.673	0.2141	0.0617	50
356	enalapril - MCF7	0.33	2	0.669	0.2183	0.0845	50
357	acenocoumarol - PC3	0.4	2	0.669	0.21899	0.2202	50
358	hydrochlorothiazide - PC3	0.399	2	0.669	0.21917	0.0949	50
359	mebendazole - MCF7	-0.538	2	-0.668	0.22035	0.378	100
360	saquinavir - MCF7	0.333	2	0.667	0.22072	0.403	50
361	chlormezanone - MCF7	0.289	2	0.667	0.22096	0.0926	50
362	aminophenazone - MCF7	-0.621	2	-0.667	0.22235	0.2614	100
363	guanabenz - MCF7	0.278	2	0.666	0.22259	0.2784	50
364	crotamiton - MCF7	0.358	2	0.665	0.22361	0.2381	50
365	dexamethasone - PC3	0.267	2	0.665	0.22383	0.4833	50
366	norfloxacin - MCF7	-0.53	2	-0.666	0.22397	0.1694	100
367	sulfamethizole - MCF7	-0.545	2	-0.665	0.22438	0.2551	100
368	edrophonium chloride - PC3	0.373	2	0.664	0.22554	0.168	50
369	0317956-0000 - PC3	-0.342	4	-0.478	0.22586	0.4262	50
370	C-75 - MCF7	-0.585	2	-0.664	0.22645	0.2013	100
371	novobiocin - MCF7	0.363	4	0.475	0.22666	0.1241	50
372	galantamine - MCF7	-0.659	2	-0.664	0.22705	0.4249	100
373	metacycline - MCF7	-0.593	2	-0.663	0.22744	0.3934	100
374	disopyramide - MCF7	0.315	2	0.661	0.22927	0.3307	50
375	Prestwick-685 - PC3	-0.678	2	-0.662	0.22977	0.4753	100
376	loracarbef - MCF7	0.239	2	0.661	0.23011	0.1987	50
377	ursolic acid - MCF7	-0.606	2	-0.661	0.23049	0.2314	100
378	clozapine - MCF7	0.156	10	0.311	0.23166	0.3011	50
379	dilazep - PC3	-0.547	2	-0.66	0.23198	0.3922	100
380	IC-86621 - PC3	0.415	2	0.659	0.23309	0.3333	50
381	solasodine - PC3	-0.662	2	-0.659	0.23321	0.3913	100
382	puromycin - MCF7	-0.419	2	-0.658	0.23438	0.4841	50
383	resveratrol - MCF7	-0.348	6	-0.396	0.23456	0.6393	66
384	isoxsuprine - MCF7	0.397	2	0.658	0.23474	0.2294	50
385	5155877 - MCF7	-0.29	2	-0.658	0.23504	0.3312	50
386	5279552 - MCF7	0.295	2	0.658	0.23506	0.2083	50
387	paroxetine - MCF7	-0.225	2	-0.657	0.23649	0.2	50
388	ethoxyquin - PC3	0.359	2	0.656	0.23679	0.2393	50
389	gliclazide - MCF7	-0.406	2	-0.656	0.23774	0.3333	50
390	todralazine - PC3	0.296	2	0.655	0.23919	0.1277	50
391	phentolamine - PC3	-0.301	2	-0.653	0.24168	0.1699	50
392	loperamide - PC3	0.389	2	0.653	0.24216	0.2899	50
393	verteporfin - MCF7	-0.427	2	-0.652	0.2423	0.4104	50
394	Chicago Sky Blue 6B - MCF7	0.262	2	0.652	0.24267	0.2959	50
395	nordihydroguaiaretic acid - MCF7	-0.253	8	-0.343	0.24396	0.3197	50
396	tetryzoline - MCF7	0.418	2	0.651	0.2442	0.0748	50
397	proadifen - MCF7	-0.346	2	-0.65	0.24554	0.3119	50
398	xamoterol - MCF7	-0.269	2	-0.649	0.24762	0.5802	50
399	BCB000038 - PC3	0.387	2	0.648	0.24802	0.2214	50
400	lysergol - MCF7	-0.264	2	-0.648	0.24872	0.2679	50
401	metixene - MCF7	0.325	2	0.646	0.25063	0.3454	50
402	metrizamide - MCF7	0.313	2	0.646	0.25079	0.35	50
403	pyrimethamine - PC3	0.295	2	0.646	0.25112	0.2857	50
404	thapsigargin - MCF7	-0.355	2	-0.646	0.25154	0.5849	50
405	dehydrocholic acid - PC3	0.459	2	0.644	0.25438	0.295	50
406	glimepiride - MCF7	-0.315	2	-0.644	0.25476	0.1173	50
407	stachydrine - MCF7	0.433	2	0.643	0.25548	0.3642	50
408	3-acetylcoumarin - MCF7	-0.464	3	-0.533	0.25747	0.3681	66
409	pronetalol - MCF7	0.353	2	0.641	0.25818	0.2167	50
410	nitrofural - MCF7	-0.348	2	-0.642	0.25826	0.2148	50
411	triamterene - PC3	0.32	2	0.641	0.25856	0.3908	50
412	calycanthine - MCF7	-0.288	2	-0.641	0.25959	0.2357	50
413	diflunisal - MCF7	-0.369	2	-0.64	0.26039	0.1796	50
414	flecainide - PC3	0.402	2	0.639	0.26104	0.2108	50
415	hydroflumethiazide - PC3	0.357	2	0.639	0.26112	0.481	50
416	vorinostat - HL60	-0.477	3	-0.531	0.26142	0.75	66
417	homatropine - MCF7	0.362	2	0.638	0.26182	0.2161	50
418	disulfiram - PC3	-0.403	2	-0.638	0.26413	0.3407	50
419	quinisocaine - MCF7	-0.387	2	-0.637	0.26452	0.2097	50
420	corticosterone - MCF7	-0.347	2	-0.637	0.26474	0.1955	50
421	zoxazolamine - MCF7	0.339	2	0.636	0.2651	0.269	50
422	amoxapine - MCF7	-0.406	2	-0.636	0.2655	0.2	50
423	azacyclonol - PC3	-0.305	2	-0.636	0.26639	0.4071	50
424	amrinone - MCF7	-0.366	2	-0.634	0.2685	0.3121	50
425	Prestwick-692 - MCF7	0.348	2	0.633	0.269	0.5179	50
426	calmidazolium - MCF7	-0.339	2	-0.634	0.26928	0.3607	50
427	PHA-00767505E - PC3	0.406	2	0.632	0.27053	0.3486	50
428	chlorzoxazone - MCF7	-0.26	2	-0.633	0.2712	0.5189	50
429	NS-398 - MCF7	-0.33	2	-0.633	0.27132	0.1786	50
430	trimethobenzamide - MCF7	-0.267	2	-0.632	0.2719	0.5208	50
431	nordihydroguaiaretic acid - PC3	0.264	2	0.631	0.27194	0.1111	50
432	xylometazoline - MCF7	-0.345	2	-0.63	0.27512	0.2686	50
433	bambuterol - MCF7	0.404	2	0.629	0.27596	0.4386	50
434	anisomycin - MCF7	-0.372	2	-0.629	0.27691	0.6219	50
435	cimetidine - MCF7	0.393	2	0.628	0.27715	0.1637	50
436	clozapine - HL60	-0.29	4	-0.454	0.27985	0.3111	50
437	acetazolamide - MCF7	-0.336	2	-0.627	0.28013	0.5114	50
438	oxetacaine - MCF7	-0.421	2	-0.627	0.28045	0.3512	50
439	disulfiram - MCF7	-0.391	2	-0.626	0.28099	0.3971	50
440	CP-944629 - PC3	0.301	2	0.625	0.28122	0.2174	50
441	0175029-0000 - PC3	-0.338	4	-0.453	0.28196	0.6129	50
442	ivermectin - PC3	-0.315	2	-0.624	0.28401	0.303	50
443	etiocholanolone - PC3	0.381	2	0.623	0.28437	0.4699	50
444	scopolamine - MCF7	-0.385	2	-0.624	0.28518	0.3837	50
445	cefalotin - MCF7	0.322	2	0.623	0.28602	0.2294	50
446	0198306-0000 - MCF7	-0.353	2	-0.622	0.28739	0.3137	50
447	antimycin A - MCF7	-0.399	2	-0.622	0.28788	0.4059	50
448	securinine - MCF7	-0.379	2	-0.622	0.2881	0.4067	50
449	rosiglitazone - HL60	-0.38	4	-0.451	0.28841	0.2907	50
450	tranexamic acid - MCF7	-0.38	2	-0.62	0.29047	0.4759	50
451	brinzolamide - MCF7	-0.329	2	-0.62	0.29158	0.2941	50
452	cefamandole - PC3	0.367	2	0.618	0.29283	0.453	50
453	amantadine - MCF7	-0.416	2	-0.618	0.29375	0.3946	50
454	idazoxan - MCF7	-0.273	2	-0.618	0.29458	0.3631	50
455	adiphenine - MCF7	0.4	2	0.616	0.29604	0.5647	50
456	liothyronine - MCF7	-0.279	2	-0.615	0.29878	0.4022	50
457	debrisoquine - MCF7	-0.301	2	-0.615	0.29963	0.2112	50
458	Prestwick-665 - PC3	-0.308	2	-0.614	0.30041	0.466	50
459	oxantel - MCF7	-0.395	2	-0.613	0.3013	0.2294	50
460	ioxaglic acid - MCF7	0.338	2	0.612	0.30178	0.3356	50
461	etofylline - MCF7	-0.366	2	-0.613	0.30204	0.1953	50
462	sulfachlorpyridazine - PC3	-0.309	2	-0.613	0.30254	0.2707	50
463	digoxin - MCF7	-0.324	2	-0.612	0.30276	0.3793	50
464	terazosin - MCF7	-0.297	2	-0.612	0.30315	0.4503	50
465	chlortalidone - MCF7	0.332	2	0.61	0.30516	0.5	50
466	SC-58125 - MCF7	-0.275	2	-0.61	0.30618	0.22	50
467	piperine - MCF7	-0.372	2	-0.61	0.30703	0.1861	50
468	cotinine - PC3	-0.315	2	-0.609	0.30731	0.5896	50
469	esculetin - MCF7	0.316	2	0.609	0.30741	0.3129	50
470	ethisterone - PC3	-0.308	2	-0.608	0.30938	0.4429	50
471	prenylamine - MCF7	-0.322	2	-0.608	0.30975	0.3679	50
472	pergolide - MCF7	-0.4	2	-0.607	0.31105	0.3252	50
473	iohexol - MCF7	0.335	2	0.606	0.31109	0.5875	50
474	meclocycline - MCF7	0.353	2	0.606	0.31134	0.3106	50
475	octopamine - MCF7	-0.4	2	-0.607	0.31226	0.4563	50
476	helveticoside - PC3	-0.304	2	-0.606	0.31262	0.3377	50
477	glipizide - PC3	-0.376	2	-0.606	0.31305	0.4602	50
478	felbinac - MCF7	0.33	2	0.605	0.31309	0.5868	50
479	ethambutol - PC3	0.352	2	0.605	0.31337	0.2279	50
480	thioproperazine - MCF7	-0.317	2	-0.606	0.31339	0.3113	50
481	famotidine - MCF7	0.409	2	0.605	0.31355	0.2153	50
482	mifepristone - MCF7	-0.436	2	-0.606	0.31393	0.3701	50
483	lomustine - PC3	-0.359	2	-0.605	0.31538	0.518	50
484	sparteine - MCF7	-0.244	2	-0.604	0.31626	0.3886	50
485	tiaprofenic acid - MCF7	0.383	2	0.603	0.31657	0.4528	50
486	carbamazepine - MCF7	-0.305	5	-0.396	0.31785	0.5409	60
487	novobiocin - PC3	0.311	2	0.602	0.31795	0.1957	50
488	fenofibrate - MCF7	-0.332	2	-0.602	0.32015	0.3861	50
489	R-atenolol - MCF7	-0.399	2	-0.601	0.32111	0.1636	50
490	pentoxifylline - MCF7	0.347	2	0.6	0.3218	0.4472	50
491	5194442 - MCF7	-0.346	2	-0.601	0.32192	0.3904	50
492	nialamide - MCF7	-0.327	2	-0.6	0.3223	0.3333	50
493	eldeline - MCF7	0.202	3	0.504	0.32347	0.3311	66
494	piperidolate - MCF7	-0.293	2	-0.599	0.32393	0.5746	50
495	tolbutamide - MCF7	-0.211	4	-0.437	0.32439	0.2704	50
496	neomycin - PC3	-0.329	2	-0.598	0.32546	0.475	50
497	methazolamide - MCF7	-0.299	2	-0.596	0.3286	0.3728	50
498	dinoprost - MCF7	-0.316	2	-0.596	0.32956	0.2821	50
499	decamethonium bromide - MCF7	0.294	2	0.595	0.32983	0.4088	50
500	theobromine - MCF7	-0.304	2	-0.595	0.33021	0.5266	50
501	amikacin - MCF7	-0.332	2	-0.594	0.3324	0.2925	50
502	pinacidil - MCF7	0.343	2	0.593	0.33246	0.2418	50
503	maprotiline - MCF7	0.274	2	0.592	0.33339	0.7165	50
504	ribavirin - MCF7	0.303	2	0.592	0.33498	0.4329	50
505	pargyline - MCF7	-0.387	2	-0.592	0.33508	0.5086	50
506	metanephrine - MCF7	-0.35	2	-0.592	0.33596	0.2365	50
507	demecarium bromide - MCF7	0.274	2	0.591	0.3362	0.5226	50
508	PHA-00745360 - PC3	-0.312	4	-0.432	0.33792	0.5538	50
509	isoconazole - MCF7	-0.29	2	-0.59	0.33878	0.2366	50
510	beta-escin - PC3	-0.359	2	-0.59	0.33926	0.3551	50
511	gliquidone - MCF7	-0.363	2	-0.589	0.34081	0.2695	50
512	rifampicin - MCF7	-0.38	2	-0.588	0.34129	0.366	50
513	ozagrel - MCF7	-0.301	2	-0.588	0.34188	0.3094	50
514	clorgiline - MCF7	-0.386	2	-0.587	0.34355	0.5407	50
515	F0447-0125 - MCF7	-0.351	2	-0.586	0.34469	0.4876	50
516	deptropine - MCF7	-0.4	2	-0.586	0.34486	0.3411	50
517	Prestwick-674 - MCF7	-0.411	3	-0.494	0.34508	0.7262	66
518	nifedipine - MCF7	-0.314	4	-0.429	0.34638	0.3631	75
519	nomegestrol - MCF7	0.351	2	0.584	0.34713	0.3455	50
520	moroxydine - MCF7	-0.359	2	-0.584	0.34795	0.3497	50
521	astemizole - MCF7	-0.298	2	-0.584	0.34906	0.4082	50
522	oleandomycin - MCF7	-0.368	2	-0.583	0.34932	0.3242	50
523	arachidonic acid - MCF7	-0.487	3	-0.492	0.34981	0.4808	66
524	mafenide - PC3	-0.356	2	-0.583	0.35039	0.1861	50
525	ajmaline - MCF7	0.308	2	0.581	0.35117	0.7059	50
526	(+)-chelidonine - MCF7	-0.393	2	-0.58	0.35481	0.1812	50
527	lynestrenol - MCF7	0.334	2	0.579	0.35506	0.3582	50
528	amoxapine - PC3	-0.392	2	-0.58	0.3552	0.4358	50
529	protriptyline - MCF7	-0.316	2	-0.579	0.35604	0.3495	50
530	perphenazine - MCF7	-0.337	2	-0.578	0.35771	0.4397	50
531	ticlopidine - PC3	-0.355	2	-0.578	0.35838	0.508	50
532	troglitazone - HL60	-0.491	4	-0.424	0.36086	0.5738	75
533	4-hydroxyphenazone - MCF7	-0.316	2	-0.576	0.36089	0.3757	50
534	thiamazole - PC3	-0.354	2	-0.576	0.36123	0.2745	50
535	cyproheptadine - PC3	-0.335	2	-0.576	0.36196	0.2553	50
536	AH-23848 - MCF7	-0.342	2	-0.575	0.36302	0.3353	50
537	3-nitropropionic acid - PC3	-0.277	2	-0.575	0.36377	0.5134	50
538	chlortetracycline - MCF7	-0.293	2	-0.575	0.36405	0.3582	50
539	propofol - MCF7	-0.399	2	-0.574	0.36427	0.264	50
540	bemegride - MCF7	0.291	2	0.572	0.36596	0.5246	50
541	ethotoin - MCF7	-0.485	3	-0.485	0.3677	0.6471	66
542	flutamide - MCF7	-0.34	2	-0.572	0.36807	0.3946	50
543	PHA-00851261E - MCF7	-0.243	4	-0.421	0.36903	0.4118	50
544	bufexamac - MCF7	-0.349	2	-0.572	0.36904	0.5432	50
545	lanatoside C - PC3	-0.315	2	-0.571	0.3697	0.39	50
546	diphemanil metilsulfate - PC3	0.33	2	0.57	0.37099	0.3624	50
547	levamisole - MCF7	-0.318	2	-0.569	0.37278	0.4331	50
548	valinomycin - PC3	-0.382	2	-0.568	0.37429	0.4186	50
549	raloxifene - HL60	-0.305	2	-0.568	0.37493	0.3416	50
550	cicloheximide - MCF7	-0.366	2	-0.567	0.37685	0.6107	50
551	doxazosin - MCF7	-0.356	2	-0.566	0.37793	0.5946	50
552	Prestwick-981 - MCF7	-0.382	2	-0.566	0.37819	0.2938	50
553	calcium folinate - PC3	0.332	2	0.565	0.37829	0.5124	50
554	tiletamine - MCF7	-0.283	2	-0.566	0.37864	0.3939	50
555	ethotoin - PC3	-0.418	2	-0.566	0.37908	0.5141	50
556	fludrocortisone - PC3	0.37	2	0.564	0.38063	0.4133	50
557	clioquinol - MCF7	-0.454	3	-0.479	0.3823	0.6618	66
558	indoprofen - MCF7	0.334	2	0.563	0.38274	0.6149	50
559	pirlindole - MCF7	-0.372	2	-0.563	0.38431	0.3072	50
560	flunixin - PC3	-0.257	2	-0.562	0.38489	0.4323	50
561	zuclopenthixol - MCF7	0.313	2	0.561	0.38572	0.8358	50
562	sitosterol - MCF7	-0.343	2	-0.562	0.38584	0.6022	50
563	santonin - PC3	0.332	2	0.56	0.38719	0.193	50
564	thioridazine - PC3	-0.27	5	-0.374	0.38806	0.7143	60
565	abamectin - MCF7	-0.46	2	-0.559	0.39008	0.5929	50
566	niclosamide - PC3	-0.364	2	-0.559	0.39081	0.438	50
567	paclitaxel - PC3	-0.321	2	-0.557	0.39336	0.3404	50
568	phthalylsulfathiazole - MCF7	-0.287	3	-0.474	0.39642	0.7725	66
569	flurbiprofen - MCF7	-0.371	3	-0.474	0.3971	0.5471	66
570	prochlorperazine - HL60	0.063	4	0.41	0.39776	0.6119	50
571	vancomycin - MCF7	0.285	2	0.553	0.39839	0.5	50
572	5182598 - MCF7	-0.394	2	-0.554	0.3989	0.6793	50
573	nicergoline - MCF7	-0.357	2	-0.552	0.40117	0.5197	50
574	fluvastatin - MCF7	-0.364	2	-0.552	0.40147	0.2195	50
575	meptazinol - MCF7	-0.363	2	-0.551	0.40296	0.4767	50
576	vitexin - MCF7	-0.354	2	-0.551	0.40308	0.6313	50
577	lisuride - PC3	0.372	2	0.55	0.40363	0.6556	50
578	hyoscyamine - PC3	0.269	2	0.549	0.40612	0.229	50
579	tiapride - MCF7	0.368	2	0.548	0.40693	0.2609	50
580	PHA-00767505E - MCF7	-0.297	2	-0.547	0.41029	0.5251	50
581	parbendazole - MCF7	-0.359	2	-0.546	0.41236	0.7727	50
582	heliotrine - PC3	-0.32	2	-0.546	0.413	0.4524	50
583	Prestwick-674 - PC3	-0.376	2	-0.545	0.41447	0.3558	50
584	homosalate - MCF7	-0.391	2	-0.544	0.41626	0.36	50
585	monorden - PC3	-0.367	5	-0.365	0.41668	0.6358	60
586	flecainide - MCF7	0.187	3	0.465	0.4181	0.358	66
587	neomycin - MCF7	-0.297	2	-0.542	0.41974	0.6539	50
588	sulfamethoxazole - PC3	0.402	2	0.541	0.42041	0.2132	50
589	cefmetazole - MCF7	-0.295	2	-0.541	0.42099	0.4183	50
590	pyrimethamine - MCF7	-0.334	2	-0.541	0.4227	0.3243	50
591	kawain - PC3	-0.327	2	-0.54	0.42326	0.4675	50
592	ciprofloxacin - MCF7	-0.341	2	-0.538	0.42789	0.4253	50
593	levopropoxyphene - MCF7	0.344	2	0.537	0.42841	0.7804	50
594	strophanthidin - MCF7	0.421	2	0.537	0.42872	0.644	50
595	nalidixic acid - MCF7	-0.282	2	-0.537	0.4289	0.3	50
596	piperacetazine - MCF7	-0.404	2	-0.537	0.42986	0.3429	50
597	valdecoxib - PC3	-0.34	2	-0.536	0.43041	0.3533	50
598	PF-01378883-00 - PC3	-0.275	2	-0.536	0.43101	0.4142	50
599	lisuride - MCF7	0.417	2	0.535	0.43242	0.8054	50
600	urapidil - MCF7	-0.351	2	-0.535	0.4327	0.488	50
601	hydralazine - PC3	0.347	2	0.535	0.433	0.3556	50
602	nitrofurantoin - MCF7	0.344	2	0.533	0.43616	0.4045	50
603	diethylstilbestrol - MCF7	-0.301	3	-0.458	0.43686	0.59	66
604	2,6-dimethylpiperidine - PC3	-0.333	2	-0.532	0.43765	0.4563	50
605	kawain - MCF7	0.358	2	0.532	0.43769	0.3757	50
606	aztreonam - MCF7	-0.307	2	-0.53	0.44012	0.448	50
607	astemizole - PC3	-0.337	2	-0.529	0.44304	0.5865	50
608	talampicillin - MCF7	-0.385	2	-0.529	0.44376	0.5029	50
609	diloxanide - MCF7	0.328	2	0.528	0.44457	0.7949	50
610	papaverine - MCF7	-0.396	2	-0.528	0.44483	0.5862	50
611	genistein - HL60	-0.373	3	-0.455	0.44554	0.5403	66
612	6-bromoindirubin-3'-oxime - PC3	-0.395	4	-0.396	0.44779	0.7463	50
613	gallamine triethiodide - PC3	-0.389	2	-0.526	0.44797	0.4882	50
614	ethosuximide - PC3	-0.431	2	-0.526	0.44823	0.4101	50
615	dexpanthenol - MCF7	-0.33	2	-0.526	0.44881	0.7468	50
616	letrozole - MCF7	0.399	2	0.525	0.44994	0.2866	50
617	etidronic acid - MCF7	-0.259	2	-0.525	0.4502	0.5431	50
618	Prestwick-984 - MCF7	-0.256	2	-0.525	0.45081	0.5	50
619	phenelzine - PC3	-0.404	2	-0.523	0.45328	0.3273	50
620	ciclosporin - MCF7	-0.103	4	-0.394	0.45467	0.5755	50
621	bendroflumethiazide - PC3	-0.396	2	-0.523	0.45471	0.4114	50
622	testosterone - MCF7	0.166	3	0.45	0.45567	0.5159	66
623	canrenoic acid - MCF7	-0.337	2	-0.521	0.45708	0.3488	50
624	spiramycin - PC3	0.46	2	0.521	0.45731	0.2407	50
625	ornidazole - PC3	-0.276	2	-0.521	0.45831	0.7225	50
626	isosorbide - MCF7	-0.342	2	-0.52	0.4601	0.3801	50
627	SB-203580 - PC3	-0.34	2	-0.519	0.46232	0.6083	50
628	clonidine - MCF7	-0.366	2	-0.517	0.46487	0.3882	50
629	PF-00562151-00 - MCF7	0.196	4	0.388	0.46721	0.4506	50
630	ramifenazone - MCF7	0.335	2	0.515	0.46835	0.4379	50
631	apomorphine - PC3	0.366	2	0.514	0.47036	0.3109	50
632	fluvoxamine - MCF7	-0.354	2	-0.515	0.47071	0.3962	50
633	meprylcaine - MCF7	-0.352	2	-0.513	0.47314	0.5114	50
634	trapidil - MCF7	-0.35	2	-0.512	0.47479	0.593	50
635	cinchocaine - PC3	-0.345	2	-0.512	0.476	0.8458	50
636	ergocalciferol - MCF7	0.332	2	0.511	0.47602	0.5287	50
637	5252917 - MCF7	-0.313	2	-0.512	0.47632	0.6627	50
638	Prestwick-1100 - PC3	-0.339	2	-0.509	0.48111	0.522	50
639	flutamide - PC3	-0.386	2	-0.506	0.48698	0.4906	50
640	calcium pantothenate - MCF7	0.317	2	0.505	0.48809	0.6127	50
641	clofazimine - MCF7	-0.251	3	-0.438	0.49187	0.705	66
642	hydrocortisone - MCF7	-0.346	2	-0.504	0.49209	0.526	50
643	cyclizine - MCF7	-0.331	2	-0.502	0.49505	0.6154	50
644	etodolac - MCF7	-0.311	2	-0.501	0.49688	0.5556	50
645	paroxetine - PC3	-0.5	2	-0.5	0.49887	0.3936	50
646	benzethonium chloride - MCF7	-0.408	2	-0.5	0.50012	0.6667	50
647	laudanosine - MCF7	-0.175	2	-0.499	0.50147	0.3077	50
648	pramocaine - MCF7	-0.284	3	-0.434	0.5021	0.5549	66
649	diphemanil metilsulfate - MCF7	-0.357	2	-0.499	0.50479	0.3904	50
650	hydroquinine - MCF7	-0.054	2	-0.499	0.50479	0.2867	50
651	medrysone - MCF7	-0.232	3	-0.433	0.50555	0.7804	66
652	dapsone - MCF7	0.446	2	0.498	0.5061	0.8075	50
653	oxolinic acid - MCF7	-0.292	2	-0.498	0.50656	0.7128	50
654	rimexolone - MCF7	-0.106	2	-0.498	0.50781	0.7574	50
655	isopropamide iodide - MCF7	0.153	2	0.497	0.51008	0.3504	50
656	tropine - MCF7	-0.114	2	-0.497	0.51181	0.2363	50
657	etodolac - PC3	0.09	2	0.497	0.51185	0.3007	50
658	Gly-His-Lys - PC3	0.437	2	0.497	0.51262	0.7657	50
659	procarbazine - MCF7	0.435	2	0.496	0.51364	0.5101	50
660	butirosin - MCF7	0.141	2	0.495	0.51718	0.5444	50
661	BCB000040 - MCF7	0.379	2	0.495	0.51877	0.4432	50
662	iodixanol - MCF7	-0.439	2	-0.495	0.5203	0.4354	50
663	0179445-0000 - MCF7	-0.345	4	-0.374	0.52044	0.6241	50
664	tolmetin - MCF7	-0.434	2	-0.493	0.52439	0.3141	50
665	chlorogenic acid - MCF7	0.084	2	0.493	0.52507	0.3816	50
666	ketanserin - MCF7	-0.433	2	-0.493	0.52535	0.768	50
667	buflomedil - MCF7	-0.283	2	-0.493	0.52664	0.6568	50
668	norcyclobenzaprine - MCF7	-0.429	2	-0.493	0.52748	0.7481	50
669	raubasine - MCF7	0.312	2	0.493	0.52754	0.5741	50
670	clofilium tosylate - MCF7	-0.298	2	-0.492	0.5307	0.704	50
671	sulfadimethoxine - MCF7	0.421	2	0.492	0.53098	0.8294	50
672	methocarbamol - MCF7	-0.102	2	-0.491	0.53263	0.5082	50
673	tolazoline - PC3	0.391	2	0.491	0.53296	0.5682	50
674	butamben - MCF7	-0.266	2	-0.491	0.53368	0.5423	50
675	dimenhydrinate - MCF7	0.121	2	0.491	0.5342	0.7764	50
676	tiratricol - MCF7	0.335	2	0.491	0.5342	0.4661	50
677	droperidol - MCF7	-0.067	2	-0.49	0.5371	0.6359	50
678	carteolol - MCF7	0.418	2	0.49	0.53746	0.5973	50
679	methylprednisolone - MCF7	0.321	2	0.49	0.53865	0.5753	50
680	citiolone - MCF7	-0.228	3	-0.42	0.54062	0.5828	66
681	metoclopramide - PC3	-0.104	2	-0.489	0.54115	0.3807	50
682	7-aminocephalosporanic acid - MCF7	0.023	2	0.489	0.54139	0.6397	50
683	aminohippuric acid - MCF7	0.377	2	0.489	0.54139	0.5038	50
684	procaine - MCF7	0.134	2	0.488	0.54398	0.5662	50
685	methapyrilene - MCF7	0.355	2	0.488	0.54513	0.52	50
686	pirinixic acid - MCF7	-0.311	2	-0.488	0.54551	0.4511	50
687	sulfathiazole - PC3	0.336	2	0.488	0.54642	0.6791	50
688	oxolamine - MCF7	0.077	2	0.487	0.54706	0.6478	50
689	dicoumarol - PC3	0.101	2	0.487	0.54748	0.3309	50
690	lithocholic acid - PC3	0.266	2	0.487	0.54748	0.7816	50
691	N-acetyl-L-aspartic acid - MCF7	-0.421	2	-0.488	0.5477	0.6687	50
692	picrotoxinin - MCF7	-0.132	2	-0.487	0.55042	0.3721	50
693	triflupromazine - MCF7	0.291	2	0.486	0.55062	0.6337	50
694	pioglitazone - MCF7	0.178	6	0.3	0.55226	0.5745	50
695	oxymetazoline - PC3	-0.419	2	-0.486	0.55356	0.7586	50
696	griseofulvin - PC3	-0.302	2	-0.486	0.55412	0.4847	50
697	diphenhydramine - PC3	0.046	2	0.486	0.55442	0.6379	50
698	SC-560 - MCF7	-0.348	2	-0.485	0.55607	0.6519	50
699	succinylsulfathiazole - MCF7	0.322	2	0.485	0.55724	0.3593	50
700	glycopyrronium bromide - MCF7	-0.126	2	-0.485	0.55793	0.5484	50
701	sulfathiazole - MCF7	-0.296	2	-0.485	0.55793	0.463	50
702	coralyne - MCF7	0.351	2	0.485	0.55793	0.627	50
703	iproniazid - MCF7	0.057	2	0.485	0.55793	0.7195	50
704	lobeline - MCF7	-0.073	2	-0.484	0.5597	0.3409	50
705	bromocriptine - PC3	-0.086	2	-0.484	0.56127	0.8211	50
706	metrifonate - PC3	0.061	2	0.484	0.56141	0.2171	50
707	mebendazole - PC3	-0.303	2	-0.484	0.56185	0.6777	50
708	chloroquine - MCF7	0.343	2	0.483	0.56277	0.5894	50
709	atropine - MCF7	-0.416	2	-0.483	0.56289	0.8325	50
710	naringin - MCF7	0.108	2	0.483	0.5633	0.5407	50
711	scoulerine - MCF7	-0.416	2	-0.483	0.5635	0.6475	50
712	fluspirilene - MCF7	-0.394	2	-0.483	0.56448	0.6019	50
713	hydroxyachillin - MCF7	-0.415	2	-0.483	0.56448	0.6154	50
714	sertaconazole - MCF7	-0.343	2	-0.483	0.56507	0.6842	50
715	diltiazem - MCF7	-0.11	2	-0.482	0.56615	0.6805	50
716	tetracaine - MCF7	0.336	2	0.482	0.56623	0.6519	50
717	ethoxyquin - MCF7	-0.045	2	-0.482	0.56678	0.3788	50
718	H-7 - PC3	-0.222	2	-0.482	0.56877	0.8235	50
719	danazol - MCF7	-0.006	2	0.481	0.57058	0.5152	50
720	quinethazone - PC3	-0.262	2	-0.481	0.5706	0.7348	50
721	chrysin - MCF7	-0.412	2	-0.481	0.57128	0.8804	50
722	chloropyramine - MCF7	0.087	2	0.48	0.57398	0.5563	50
723	halofantrine - MCF7	-0.148	2	-0.48	0.57539	0.4895	50
724	nalbuphine - MCF7	-0.41	2	-0.48	0.57668	0.7076	50
725	PHA-00816795 - PC3	-0.022	2	-0.479	0.57883	0.5969	50
726	bupivacaine - MCF7	0.005	2	0.479	0.57961	0.4727	50
727	dl-alpha tocopherol - MCF7	-0.068	2	-0.479	0.57988	0.3452	50
728	moxisylyte - MCF7	-0.409	2	-0.479	0.58048	0.8229	50
729	propafenone - MCF7	-0.409	2	-0.478	0.58281	0.5608	50
730	AG-013608 - MCF7	-0.135	4	-0.355	0.58684	0.6784	50
731	fluphenazine - PC3	-0.466	3	-0.403	0.58761	0.6752	66
732	DL-thiorphan - MCF7	-0.378	2	-0.477	0.58796	0.9091	50
733	levonorgestrel - MCF7	-0.243	3	-0.402	0.58944	0.7097	66
734	flufenamic acid - PC3	-0.299	2	-0.476	0.59094	0.7938	50
735	imipenem - MCF7	-0.064	2	-0.476	0.59094	0.7791	50
736	sulfasalazine - MCF7	-0.41	3	-0.401	0.59218	0.7469	66
737	cefotaxime - PC3	0.063	2	0.475	0.59305	0.6736	50
738	captopril - PC3	0.045	2	0.475	0.59356	0.4519	50
739	amprolium - MCF7	-0.359	2	-0.474	0.59688	0.8372	50
740	cefoxitin - MCF7	-0.053	2	-0.474	0.59688	0.5762	50
741	Trolox C - MCF7	0.032	2	0.474	0.59825	0.4963	50
742	tolfenamic acid - PC3	-0.405	2	-0.473	0.59988	0.6914	50
743	molsidomine - MCF7	0.072	2	0.473	0.60002	0.5829	50
744	gossypol - PC3	-0.356	2	-0.473	0.60048	0.529	50
745	moroxydine - PC3	0.079	2	0.473	0.60076	0.4919	50
746	nipecotic acid - MCF7	0.295	2	0.473	0.60076	0.5986	50
747	diphenhydramine - MCF7	0.392	2	0.473	0.60126	0.7531	50
748	AH-6809 - PC3	0.072	2	0.473	0.60205	0.579	50
749	orciprenaline - MCF7	-0.404	2	-0.472	0.60265	0.5212	50
750	procaine - PC3	-0.344	2	-0.472	0.60265	0.8186	50
751	copper sulfate - MCF7	0.018	2	0.472	0.60462	0.6842	50
752	omeprazole - MCF7	-0.404	2	-0.472	0.60464	0.8413	50
753	STOCK1N-28457 - MCF7	-0.404	2	-0.471	0.60651	0.7784	50
754	chlorphenamine - MCF7	0.383	2	0.471	0.60861	0.6525	50
755	tenoxicam - MCF7	-0.317	2	-0.471	0.60893	0.4888	50
756	benzonatate - PC3	0.107	2	0.471	0.60939	0.3796	50
757	fosfosal - MCF7	0.092	2	0.47	0.60985	0.6552	50
758	phenindione - MCF7	-0.077	2	-0.47	0.61054	0.6343	50
759	repaglinide - MCF7	-0.268	2	-0.47	0.61054	0.8827	50
760	hydroxyzine - PC3	0.06	2	0.47	0.61092	0.7515	50
761	cortisone - MCF7	-0.046	2	-0.47	0.61289	0.8363	50
762	trimipramine - MCF7	-0.402	2	-0.469	0.61404	0.7368	50
763	buspirone - MCF7	0.388	2	0.469	0.61438	0.4307	50
764	azacyclonol - MCF7	0.388	2	0.469	0.61488	0.8341	50
765	drofenine - MCF7	-0.402	2	-0.469	0.61597	0.4539	50
766	SC-19220 - MCF7	0.314	2	0.469	0.61627	0.5097	50
767	sulfametoxydiazine - MCF7	-0.33	2	-0.469	0.6171	0.8247	50
768	amiloride - PC3	0.337	2	0.468	0.6175	0.5221	50
769	CP-319743 - MCF7	-0.357	2	-0.469	0.61762	0.6591	50
770	prednisone - MCF7	-0.132	2	-0.468	0.61869	0.5419	50
771	flunisolide - MCF7	-0.22	3	-0.391	0.61964	0.7279	66
772	norethisterone - MCF7	0.001	2	0.468	0.61987	0.7313	50
773	mecamylamine - MCF7	-0.089	2	-0.467	0.62235	0.7093	50
774	melatonin - MCF7	0.386	2	0.467	0.62249	0.7441	50
775	PNU-0230031 - MCF7	0.17	4	0.343	0.62396	0.5736	50
776	GW-8510 - PC3	-0.25	2	-0.467	0.62404	0.9065	50
777	piroxicam - MCF7	-0.299	2	-0.466	0.62521	0.6705	50
778	mebhydrolin - MCF7	0.38	2	0.466	0.62764	0.6667	50
779	dienestrol - MCF7	0.042	2	0.465	0.62935	0.6774	50
780	gabapentin - MCF7	-0.399	2	-0.465	0.63052	0.6529	50
781	Prestwick-685 - MCF7	-0.398	2	-0.464	0.63219	0.8204	50
782	promethazine - MCF7	-0.398	2	-0.464	0.63275	0.7708	50
783	pilocarpine - MCF7	0.382	2	0.464	0.63323	0.875	50
784	AG-013608 - PC3	-0.324	4	-0.341	0.63604	0.6382	50
785	progesterone - MCF7	0.057	2	0.463	0.63629	0.6343	50
786	etofylline - PC3	-0.072	2	-0.463	0.6369	0.6131	50
787	hydrastinine - PC3	-0.114	2	-0.463	0.63746	0.8204	50
788	prilocaine - MCF7	-0.423	3	-0.385	0.63841	0.64	66
789	brompheniramine - MCF7	-0.371	2	-0.461	0.64348	0.3333	50
790	chlorhexidine - MCF7	0.303	2	0.461	0.6442	0.7317	50
791	risperidone - MCF7	0.028	2	0.461	0.6442	0.3429	50
792	sisomicin - MCF7	-0.133	2	-0.461	0.64462	0.5714	50
793	cisapride - MCF7	-0.396	2	-0.46	0.64619	0.7063	50
794	acebutolol - PC3	0.297	2	0.459	0.64812	0.5912	50
795	fursultiamine - MCF7	-0.073	2	-0.46	0.64822	0.6667	50
796	Prestwick-675 - PC3	0.378	2	0.459	0.64907	0.6342	50
797	methylbenzethonium chloride - MCF7	-0.456	3	-0.381	0.64965	0.6786	66
798	hexetidine - MCF7	-0.072	2	-0.459	0.6507	0.5185	50
799	clopamide - MCF7	0.348	2	0.458	0.65211	0.7123	50
800	pentolonium - MCF7	-0.07	2	-0.459	0.65287	0.4899	50
801	sulfamonomethoxine - MCF7	-0.329	2	-0.458	0.65436	0.7848	50
802	levothyroxine sodium - MCF7	-0.135	2	-0.458	0.65494	0.6685	50
803	cycloserine - MCF7	0.149	2	0.457	0.65514	0.7427	50
804	proglumide - MCF7	0.288	2	0.457	0.65514	0.5549	50
805	propidium iodide - MCF7	-0.298	2	-0.457	0.65643	0.4663	50
806	beta-escin - MCF7	-0.438	3	-0.378	0.65668	0.7133	66
807	spiradoline - PC3	-0.145	2	-0.457	0.65694	0.7405	50
808	noscapine - MCF7	0.092	2	0.457	0.65706	0.5	50
809	tetracycline - MCF7	0.352	2	0.457	0.65706	0.7964	50
810	carbarsone - MCF7	-0.353	2	-0.457	0.6576	0.9096	50
811	riluzole - PC3	0.091	2	0.456	0.65812	0.669	50
812	trimethadione - MCF7	-0.151	2	-0.457	0.65949	0.5938	50
813	arcaine - MCF7	0.285	2	0.455	0.66134	0.8438	50
814	colistin - MCF7	0.374	2	0.455	0.66392	0.8508	50
815	foliosidine - PC3	0.373	2	0.454	0.66651	0.5407	50
816	dihydroergotamine - PC3	0.008	2	0.454	0.66704	0.5404	50
817	ginkgolide A - MCF7	-0.392	2	-0.454	0.66726	0.8913	50
818	dyclonine - MCF7	0.063	2	0.453	0.66816	0.7734	50
819	helveticoside - MCF7	-0.184	3	-0.374	0.66972	0.6786	66
820	trimethoprim - MCF7	-0.016	2	0.452	0.67194	0.6333	50
821	xylazine - MCF7	-0.323	2	-0.453	0.67219	0.8438	50
822	dehydrocholic acid - MCF7	-0.051	2	-0.452	0.67331	0.8077	50
823	levodopa - MCF7	-0.392	2	-0.452	0.67382	0.625	50
824	citalopram - PC3	0.275	2	0.452	0.67398	0.7278	50
825	bretylium tosilate - MCF7	-0.052	2	-0.452	0.67444	0.6968	50
826	lasalocid - MCF7	0.252	2	0.451	0.67462	0.9029	50
827	(+/-)-catechin - MCF7	-0.064	2	-0.452	0.67563	0.6587	50
828	diethylstilbestrol - PC3	-0.3	2	-0.452	0.67563	0.5938	50
829	karakoline - PC3	0.353	2	0.451	0.67579	0.6861	50
830	ampyrone - MCF7	0.277	2	0.451	0.67611	0.8117	50
831	naltrexone - PC3	0.371	2	0.451	0.67671	0.766	50
832	physostigmine - MCF7	-0.39	2	-0.45	0.67929	0.6864	50
833	STOCK1N-35874 - PC3	0.294	2	0.45	0.67933	0.7391	50
834	propranolol - MCF7	0.036	2	0.45	0.6805	0.5352	50
835	ampicillin - MCF7	0.371	2	0.449	0.68098	0.8034	50
836	(-)-MK-801 - MCF7	-0.076	2	-0.45	0.68112	0.7177	50
837	altizide - MCF7	0.371	2	0.449	0.68404	0.7151	50
838	CP-319743 - PC3	0.342	2	0.448	0.68553	0.8622	50
839	spectinomycin - MCF7	-0.388	2	-0.449	0.68555	0.7024	50
840	cefadroxil - MCF7	-0.389	2	-0.449	0.68601	0.6339	50
841	gelsemine - MCF7	-0.368	2	-0.448	0.68669	0.5196	50
842	furosemide - MCF7	-0.067	2	-0.448	0.68718	0.6264	50
843	benzonatate - MCF7	0.37	2	0.447	0.68786	0.6258	50
844	ciclacillin - MCF7	-0.389	2	-0.448	0.68796	0.6503	50
845	5155877 - PC3	-0.389	2	-0.448	0.68862	0.7133	50
846	sulfinpyrazone - MCF7	0.285	2	0.447	0.68985	0.6058	50
847	ribostamycin - MCF7	-0.008	2	0.446	0.69062	0.5347	50
848	bepridil - MCF7	-0.388	2	-0.446	0.69313	0.776	50
849	myosmine - PC3	0.288	2	0.445	0.69462	0.705	50
850	tracazolate - MCF7	0.002	2	0.445	0.69512	0.5987	50
851	fluoxetine - MCF7	-0.001	2	0.445	0.69563	0.8705	50
852	pridinol - MCF7	-0.387	2	-0.445	0.69768	0.7572	50
853	nortriptyline - MCF7	0.058	2	0.444	0.69776	0.8756	50
854	proscillaridin - MCF7	0.068	2	0.444	0.6987	0.9381	50
855	tomatidine - MCF7	-0.387	2	-0.444	0.69889	0.9421	50
856	suxibuzone - MCF7	-0.039	2	-0.444	0.70064	0.7318	50
857	riboflavin - MCF7	0.008	2	0.443	0.70094	0.7727	50
858	methylbenzethonium chloride - PC3	-0.35	2	-0.443	0.7015	0.718	50
859	streptomycin - MCF7	-0.386	2	-0.443	0.70188	0.8105	50
860	prilocaine - PC3	-0.066	2	-0.443	0.70241	0.5568	50
861	3-hydroxy-DL-kynurenine - MCF7	-0.117	4	-0.321	0.70336	0.7968	50
862	metoprolol - MCF7	0.104	2	0.442	0.70357	0.9444	50
863	solasodine - MCF7	-0.451	3	-0.361	0.70399	0.7333	66
864	F0447-0125 - PC3	-0.373	2	-0.442	0.70532	0.7778	50
865	furaltadone - MCF7	-0.435	3	-0.36	0.70738	0.8225	66
866	benzamil - MCF7	-0.131	3	-0.36	0.70844	0.7194	66
867	zardaverine - MCF7	0.342	2	0.441	0.70899	0.7891	50
868	sulfafurazole - MCF7	-0.416	3	-0.359	0.70938	0.8889	66
869	methoxsalen - MCF7	0.112	2	0.44	0.70955	0.5796	50
870	bupropion - MCF7	0.043	2	0.44	0.7121	0.6646	50
871	midecamycin - PC3	0.33	2	0.44	0.7121	0.5794	50
872	fendiline - MCF7	-0.385	2	-0.439	0.71267	0.7449	50
873	ciclacillin - PC3	0.096	2	0.439	0.71311	0.6831	50
874	hydrastine hydrochloride - MCF7	-0.033	2	-0.439	0.71458	0.8324	50
875	pyridoxine - MCF7	-0.384	2	-0.438	0.71639	0.9425	50
876	podophyllotoxin - MCF7	0.336	2	0.438	0.7176	0.9215	50
877	proguanil - MCF7	0.266	2	0.437	0.72029	0.7764	50
878	idoxuridine - MCF7	0.004	2	0.436	0.72112	0.8554	50
879	MK-886 - MCF7	0.046	2	0.436	0.72146	0.7516	50
880	dapsone - PC3	0.11	2	0.436	0.72178	0.5212	50
881	cinchonidine - MCF7	-0.097	2	-0.436	0.7223	0.6284	50
882	methacholine chloride - MCF7	-0.383	2	-0.436	0.72267	0.8889	50
883	thiethylperazine - MCF7	0.341	2	0.435	0.724	0.6433	50
884	exisulind - MCF7	0.333	2	0.435	0.72583	0.6812	50
885	isoetarine - MCF7	-0.383	2	-0.435	0.72623	0.8072	50
886	dimethadione - MCF7	0.361	2	0.435	0.72623	0.7185	50
887	tranylcypromine - MCF7	0.004	2	0.434	0.72858	0.7778	50
888	fenbufen - PC3	-0.381	2	-0.433	0.73132	0.918	50
889	dihydrostreptomycin - MCF7	0.096	2	0.433	0.73156	0.5347	50
890	guanadrel - MCF7	0.269	2	0.432	0.73299	0.8608	50
891	adenosine phosphate - MCF7	-0.021	2	0.432	0.73365	0.5289	50
892	meclozine - MCF7	-0.365	3	-0.351	0.73382	0.7862	66
893	alexidine - PC3	-0.298	2	-0.432	0.73516	0.8846	50
894	fusidic acid - MCF7	-0.381	2	-0.432	0.73516	0.6626	50
895	Prestwick-967 - MCF7	0.351	2	0.432	0.7355	0.8701	50
896	PNU-0230031 - PC3	-0.022	4	0.309	0.73773	0.7716	50
897	diflunisal - PC3	0.022	2	0.431	0.73814	0.6273	50
898	eucatropine - PC3	0.324	2	0.43	0.73953	0.7377	50
899	CP-863187 - PC3	-0.38	2	-0.43	0.74013	0.8457	50
900	PHA-00745360 - MCF7	0.139	4	0.308	0.74066	0.9143	50
901	imipramine - MCF7	-0.015	2	0.429	0.7419	0.6994	50
902	pseudopelletierine - MCF7	-0.38	2	-0.429	0.74234	0.8308	50
903	S-propranolol - MCF7	-0.077	2	-0.429	0.74275	0.5137	50
904	picotamide - MCF7	-0.32	2	-0.429	0.74369	0.8246	50
905	amodiaquine - MCF7	0.001	2	0.429	0.74391	0.7469	50
906	picotamide - PC3	-0.38	2	-0.428	0.745	0.8865	50
907	monobenzone - MCF7	-0.379	2	-0.427	0.74756	0.8014	50
908	chlorpromazine - HL60	0.155	4	0.305	0.74915	0.7031	50
909	meclofenamic acid - PC3	-0.108	2	-0.427	0.74963	0.874	50
910	0316684-0000 - PC3	0.011	2	0.426	0.74989	0.8805	50
911	desoxycortone - MCF7	0.001	2	0.426	0.75158	0.6471	50
912	mometasone - MCF7	-0.376	2	-0.426	0.75224	0.6016	50
913	iopanoic acid - MCF7	0.309	2	0.425	0.75426	0.8508	50
914	etamivan - MCF7	0.007	2	0.425	0.75488	0.7049	50
915	diclofenamide - MCF7	-0.336	2	-0.425	0.75496	0.7843	50
916	sulfadiazine - PC3	-0.034	2	-0.425	0.75496	0.6327	50
917	L-methionine sulfoximine - MCF7	-0.377	2	-0.425	0.7556	0.6667	50
918	minaprine - MCF7	-0.27	2	-0.425	0.7556	0.736	50
919	colforsin - MCF7	-0.377	2	-0.424	0.7587	0.7705	50
920	harpagoside - MCF7	0.354	2	0.423	0.76041	0.8636	50
921	mephenesin - MCF7	-0.309	2	-0.422	0.76275	0.6564	50
922	perphenazine - PC3	0.311	2	0.422	0.76417	0.8873	50
923	sulfaphenazole - MCF7	0.353	2	0.422	0.76417	0.8414	50
924	hexamethonium bromide - PC3	0.028	2	0.42	0.76766	0.6331	50
925	khellin - MCF7	0.352	2	0.42	0.76792	0.9615	50
926	tolbutamide - PC3	-0.322	2	-0.42	0.76806	0.6303	50
927	fluorometholone - MCF7	0.346	2	0.419	0.77015	0.8462	50
928	alfaxalone - MCF7	-0.375	2	-0.419	0.77053	0.8035	50
929	benzocaine - MCF7	0.231	2	0.419	0.77116	0.9018	50
930	phenformin - PC3	0.032	2	0.417	0.77647	0.8354	50
931	famotidine - PC3	0.017	2	0.417	0.77763	0.6569	50
932	dextromethorphan - MCF7	-0.087	2	-0.417	0.77792	0.75	50
933	iopamidol - MCF7	-0.113	2	-0.416	0.77961	0.9586	50
934	miconazole - PC3	0.035	2	0.415	0.78212	0.8539	50
935	isradipine - MCF7	-0.372	2	-0.414	0.78534	0.7143	50
936	hexylcaine - MCF7	0.003	2	0.413	0.78705	0.6761	50
937	diclofenac - PC3	-0.313	2	-0.413	0.78753	0.9029	50
938	cinnarizine - MCF7	-0.372	2	-0.412	0.7892	0.7006	50
939	cyclobenzaprine - MCF7	0.332	2	0.413	0.78922	0.8944	50
940	demeclocycline - PC3	-0.302	2	-0.412	0.79035	0.7596	50
941	hecogenin - MCF7	-0.371	2	-0.411	0.79089	0.84	50
942	H-7 - MCF7	0.103	2	0.411	0.79341	0.8889	50
943	glycocholic acid - MCF7	-0.308	2	-0.41	0.79427	0.8261	50
944	Prestwick-983 - MCF7	-0.054	2	-0.41	0.7951	0.8693	50
945	dexibuprofen - MCF7	-0.309	2	-0.41	0.79548	0.7278	50
946	lomustine - MCF7	0.33	2	0.41	0.7961	0.8354	50
947	levobunolol - MCF7	0.27	2	0.409	0.79749	0.8491	50
948	esculin - MCF7	-0.37	2	-0.408	0.79878	0.8526	50
949	metergoline - MCF7	-0.342	2	-0.408	0.79878	0.7597	50
950	Prestwick-682 - MCF7	0.013	2	0.408	0.79967	0.7643	50
951	AG-012559 - PC3	-0.37	2	-0.408	0.79967	0.8201	50
952	metronidazole - PC3	-0.359	2	-0.408	0.80023	0.8038	50
953	betazole - PC3	0.021	2	0.408	0.80085	0.7407	50
954	enilconazole - MCF7	-0.369	2	-0.408	0.80113	0.8686	50
955	carbamazepine - PC3	0.346	2	0.408	0.8013	0.7448	50
956	nafcillin - MCF7	0.021	2	0.407	0.8027	0.7463	50
957	methanthelinium bromide - MCF7	0.319	2	0.407	0.80403	0.7734	50
958	baclofen - MCF7	0.035	2	0.407	0.80474	0.8827	50
959	cefamandole - MCF7	-0.369	2	-0.406	0.8052	0.8682	50
960	salbutamol - MCF7	-0.349	2	-0.406	0.8052	0.7692	50
961	gabexate - MCF7	0.345	2	0.406	0.80677	0.9161	50
962	5707885 - MCF7	-0.04	2	-0.405	0.80715	0.7168	50
963	androsterone - MCF7	0.052	2	0.405	0.80804	0.7971	50
964	cinoxacin - MCF7	-0.082	2	-0.403	0.81138	0.7485	50
965	diazoxide - PC3	-0.344	2	-0.403	0.8116	0.8083	50
966	selegiline - MCF7	-0.368	2	-0.403	0.81232	0.847	50
967	alvespimycin - PC3	-0.337	2	-0.403	0.81268	0.7529	50
968	cefalexin - MCF7	-0.355	3	-0.325	0.81292	0.9105	66
969	cefepime - MCF7	0.29	2	0.403	0.81337	0.6786	50
970	betazole - MCF7	-0.027	2	-0.402	0.81389	0.7955	50
971	cytisine - MCF7	-0.077	2	-0.402	0.81453	0.6552	50
972	PF-00539758-00 - PC3	0.001	2	0.402	0.81582	0.8639	50
973	midecamycin - MCF7	-0.01	2	0.401	0.81683	0.6458	50
974	palmatine - MCF7	0.099	2	0.401	0.81789	0.5603	50
975	riluzole - MCF7	0.069	2	0.401	0.8188	0.7081	50
976	perhexiline - MCF7	-0.32	2	-0.4	0.81938	0.8148	50
977	lovastatin - MCF7	-0.362	2	-0.4	0.82051	0.7823	50
978	etifenin - MCF7	-0.366	2	-0.399	0.82136	0.8303	50
979	nifedipine - PC3	0.055	2	0.399	0.82303	0.7391	50
980	SB-202190 - PC3	-0.366	2	-0.398	0.82558	0.8022	50
981	ofloxacin - MCF7	-0.321	2	-0.397	0.82594	0.8155	50
982	levodopa - PC3	-0.366	2	-0.397	0.82632	0.9034	50
983	napelline - MCF7	0.045	2	0.398	0.82651	0.7516	50
984	cefazolin - MCF7	0.341	2	0.397	0.82801	0.8198	50
985	minoxidil - PC3	-0.344	2	-0.396	0.82806	0.9257	50
986	mestranol - MCF7	-0.365	2	-0.396	0.82844	0.8582	50
987	spironolactone - MCF7	-0.365	2	-0.396	0.82977	0.9329	50
988	pimethixene - MCF7	0	2	0.396	0.82999	0.9491	50
989	acacetin - PC3	0.28	2	0.396	0.83045	0.8158	50
990	pirinixic acid - PC3	-0.364	2	-0.395	0.83196	0.8976	50
991	carbinoxamine - MCF7	0.339	2	0.395	0.83323	0.8255	50
992	bromopride - PC3	-0.11	2	-0.394	0.83415	0.7841	50
993	prasterone - MCF7	0.03	2	0.394	0.83425	0.9216	50
994	iocetamic acid - MCF7	-0.008	2	0.394	0.83449	0.74	50
995	dinoprostone - MCF7	-0.068	2	-0.393	0.83653	0.8187	50
996	N6-methyladenosine - MCF7	0.339	2	0.393	0.83659	0.9073	50
997	ramipril - MCF7	-0.067	2	-0.393	0.83695	0.65	50
998	conessine - MCF7	-0.004	2	0.393	0.83717	0.6853	50
999	NU-1025 - MCF7	0.019	2	0.392	0.83888	0.7698	50
1000	vincamine - PC3	0.338	2	0.392	0.83912	0.8562	50
1001	clindamycin - PC3	-0.042	2	-0.392	0.83944	0.8378	50
1002	fenspiride - MCF7	0.327	2	0.392	0.83976	0.6718	50
1003	verapamil - PC3	0.337	2	0.391	0.84071	0.7133	50
1004	primidone - MCF7	-0.015	2	0.391	0.84141	0.6928	50
1005	antazoline - MCF7	0.002	2	0.391	0.8417	0.9125	50
1006	mephenesin - PC3	-0.363	2	-0.391	0.84258	0.9278	50
1007	metamizole sodium - PC3	0.085	2	0.39	0.84274	0.8656	50
1008	erythromycin - PC3	0.336	2	0.39	0.84367	0.7939	50
1009	nifenazone - MCF7	-0.035	2	-0.388	0.84727	0.858	50
1010	tremorine - MCF7	-0.361	2	-0.388	0.84862	0.9032	50
1011	co-dergocrine mesilate - MCF7	-0.258	2	-0.387	0.84991	0.8864	50
1012	alcuronium chloride - MCF7	-0.045	2	-0.387	0.85037	0.904	50
1013	isoconazole - PC3	0.029	2	0.387	0.85053	0.8931	50
1014	tetramisole - MCF7	0.334	2	0.386	0.85274	0.8121	50
1015	cyproheptadine - MCF7	0.293	2	0.385	0.85405	0.9184	50
1016	pizotifen - MCF7	-0.325	2	-0.385	0.85443	0.7851	50
1017	PNU-0293363 - PC3	-0.094	2	-0.385	0.85522	0.7622	50
1018	(-)-atenolol - MCF7	-0.36	2	-0.384	0.85578	0.8784	50
1019	sulfabenzamide - MCF7	-0.36	2	-0.384	0.85659	0.9111	50
1020	amphotericin B - MCF7	-0.032	2	-0.384	0.85693	0.8514	50
1021	homatropine - PC3	-0.038	2	-0.384	0.85741	0.7671	50
1022	phensuximide - MCF7	-0.051	2	-0.383	0.85838	0.8715	50
1023	chloropyrazine - MCF7	0.251	2	0.383	0.85896	0.8844	50
1024	iopromide - MCF7	0.004	2	0.383	0.85896	0.9051	50
1025	mefexamide - MCF7	-0.03	2	-0.382	0.86083	0.8121	50
1026	tolnaftate - MCF7	0.268	2	0.382	0.86111	0.9713	50
1027	quinidine - MCF7	-0.359	2	-0.382	0.86184	0.8137	50
1028	thiamine - MCF7	-0.326	2	-0.382	0.86184	0.9066	50
1029	triamcinolone - MCF7	-0.346	2	-0.381	0.86216	0.8693	50
1030	Prestwick-691 - MCF7	-0.234	2	-0.381	0.86335	0.95	50
1031	kaempferol - MCF7	-0.065	2	-0.38	0.86449	0.831	50
1032	zimeldine - MCF7	-0.358	2	-0.38	0.86524	0.9306	50
1033	pivampicillin - MCF7	0.317	2	0.38	0.86538	0.8913	50
1034	nicergoline - PC3	0.079	2	0.379	0.86606	0.8807	50
1035	tetrandrine - MCF7	-0.266	2	-0.379	0.86652	0.8051	50
1036	bisoprolol - MCF7	-0.343	2	-0.379	0.86691	0.8442	50
1037	triprolidine - MCF7	-0.358	2	-0.378	0.86916	0.8409	50
1038	etanidazole - MCF7	0.007	2	0.377	0.87043	0.855	50
1039	meclofenamic acid - MCF7	0.262	2	0.377	0.87043	0.9097	50
1040	bacitracin - MCF7	0.325	2	0.377	0.87204	0.8468	50
1041	atractyloside - MCF7	0.011	2	0.376	0.87242	0.9405	50
1042	resveratrol - PC3	-0.35	2	-0.376	0.87292	0.879	50
1043	cefotaxime - MCF7	-0.022	2	0.376	0.87347	0.8095	50
1044	parthenolide - MCF7	-0.247	2	-0.376	0.87417	0.9621	50
1045	mitoxantrone - MCF7	-0.331	2	-0.375	0.87445	0.8615	50
1046	heptaminol - MCF7	0.327	2	0.375	0.87518	0.9216	50
1047	minoxidil - MCF7	0.328	2	0.375	0.87596	0.9474	50
1048	dihydrostreptomycin - PC3	0.281	2	0.374	0.87646	0.8767	50
1049	ketoconazole - MCF7	-0.051	2	-0.374	0.87813	0.8212	50
1050	dizocilpine - PC3	-0.07	2	-0.373	0.87876	0.8042	50
1051	hydroxyzine - MCF7	-0.352	2	-0.373	0.8791	0.7528	50
1052	suloctidil - MCF7	0.264	2	0.373	0.87934	0.9486	50
1053	Prestwick-1080 - MCF7	-0.061	2	-0.372	0.88047	0.8626	50
1054	ticlopidine - MCF7	-0.262	2	-0.372	0.88109	0.879	50
1055	vinpocetine - MCF7	-0.045	2	-0.372	0.88141	0.9005	50
1056	sulfachlorpyridazine - MCF7	0.097	2	0.372	0.88174	0.8083	50
1057	tyloxapol - MCF7	0.025	2	0.371	0.88391	0.8696	50
1058	0316684-0000 - MCF7	-0.33	2	-0.369	0.88568	0.9286	50
1059	ivermectin - MCF7	-0.031	2	-0.369	0.88703	0.9474	50
1060	0173570-0000 - MCF7	-0.058	2	-0.368	0.88862	0.8876	50
1061	orlistat - PC3	-0.02	2	0.367	0.89089	0.7714	50
1062	trimethoprim - PC3	-0.253	2	-0.366	0.89149	0.8868	50
1063	erythromycin - MCF7	-0.315	2	-0.366	0.89202	0.8321	50
1064	piretanide - MCF7	0.006	2	0.367	0.8922	0.8309	50
1065	simvastatin - MCF7	-0.339	2	-0.366	0.89238	0.9214	50
1066	fluorocurarine - MCF7	0.01	2	0.366	0.89256	0.8844	50
1067	mephentermine - PC3	-0.354	2	-0.366	0.89292	0.924	50
1068	nisoxetine - MCF7	-0.338	2	-0.365	0.89467	0.9613	50
1069	cefixime - MCF7	0.082	2	0.364	0.89715	0.8151	50
1070	oxyphenbutazone - MCF7	-0.017	2	0.364	0.89731	0.9518	50
1071	glafenine - MCF7	0.05	2	0.364	0.89753	0.8626	50
1072	tetracycline - PC3	-0.344	2	-0.363	0.89795	0.9578	50
1073	thioguanosine - MCF7	-0.353	2	-0.363	0.89815	0.9394	50
1074	levcycloserine - MCF7	-0.056	2	-0.362	0.89898	0.9337	50
1075	dipivefrine - MCF7	0.063	2	0.363	0.89914	0.8219	50
1076	difenidol - MCF7	0.011	2	0.363	0.8998	0.916	50
1077	mephentermine - MCF7	0.303	2	0.362	0.90008	0.8689	50
1078	atropine oxide - MCF7	-0.038	2	-0.361	0.90014	0.9521	50
1079	BCB000040 - PC3	-0.338	2	-0.36	0.90157	0.9	50
1080	estradiol - PC3	-0.225	8	-0.185	0.90218	0.9337	50
1081	triflusal - MCF7	-0.008	2	0.361	0.90268	0.916	50
1082	metitepine - MCF7	-0.006	2	0.361	0.90332	0.9951	50
1083	antimycin A - PC3	-0.083	2	-0.359	0.90465	0.9563	50
1084	indometacin - PC3	0.035	2	0.359	0.9065	0.8278	50
1085	iloprost - MCF7	0.033	2	0.357	0.90886	0.9669	50
1086	sulfanilamide - MCF7	-0.041	2	-0.356	0.90918	0.88	50
1087	2-aminobenzenesulfonamide - MCF7	-0.028	2	0.356	0.91085	0.9355	50
1088	ioversol - MCF7	-0.078	2	-0.355	0.91169	0.8973	50
1089	cyclopentolate - MCF7	-0.003	2	0.356	0.91185	0.8387	50
1090	glipizide - MCF7	-0.091	2	-0.354	0.91276	0.7895	50
1091	dorzolamide - MCF7	0.307	2	0.355	0.9128	0.9136	50
1092	oxybutynin - MCF7	-0.003	2	0.355	0.91324	0.9639	50
1093	chlorambucil - MCF7	-0.35	2	-0.353	0.91507	0.9149	50
1094	diltiazem - PC3	-0.319	2	-0.352	0.91542	0.9724	50
1095	5253409 - MCF7	-0.349	2	-0.352	0.91682	0.812	50
1096	chlorprothixene - MCF7	-0.047	2	-0.351	0.91785	0.8942	50
1097	solanine - MCF7	-0.315	2	-0.349	0.92163	0.9085	50
1098	zidovudine - MCF7	-0.328	2	-0.347	0.92465	0.9138	50
1099	famprofazone - PC3	-0.26	2	-0.347	0.92513	0.9775	50
1100	indometacin - MCF7	-0.348	4	-0.244	0.92536	0.9576	50
1101	isoniazid - PC3	-0.045	2	-0.346	0.92604	0.9684	50
1102	methotrexate - HL60	-0.31	2	-0.346	0.92604	0.9708	50
1103	dipyridamole - PC3	0.07	2	0.346	0.92737	0.8963	50
1104	pimozide - MCF7	0.02	2	0.346	0.92845	0.9803	50
1105	5248896 - MCF7	-0.347	2	-0.344	0.92932	0.9803	50
1106	SR-95639A - MCF7	0.02	2	0.344	0.93067	0.9167	50
1107	dequalinium chloride - MCF7	-0.29	2	-0.342	0.93173	0.9618	50
1108	pentetrazol - MCF7	-0.042	2	-0.338	0.93692	0.9774	50
1109	chlorcyclizine - PC3	-0.307	2	-0.337	0.93781	0.9543	50
1110	enoxacin - MCF7	-0.27	2	-0.337	0.93833	0.9709	50
1111	pipenzolate bromide - MCF7	0.001	2	0.339	0.93835	0.9396	50
1112	tiapride - PC3	-0.338	2	-0.337	0.93855	0.9539	50
1113	betonicine - PC3	-0.02	2	0.338	0.9391	0.9404	50
1114	Y-27632 - MCF7	-0.331	2	-0.336	0.93926	0.9891	50
1115	nomifensine - PC3	-0.069	2	-0.336	0.93948	0.8982	50
1116	estriol - MCF7	-0.33	2	-0.335	0.94075	0.9565	50
1117	estrone - MCF7	0.042	2	0.337	0.94169	0.9097	50
1118	azlocillin - MCF7	-0.343	2	-0.334	0.94228	0.9451	50
1119	bicuculline - MCF7	-0.343	2	-0.334	0.94304	0.9795	50
1120	retrorsine - MCF7	-0.039	2	0.335	0.9436	0.9219	50
1121	merbromin - MCF7	-0.048	2	-0.332	0.9456	0.9194	50
1122	betaxolol - MCF7	-0.274	2	-0.329	0.94886	0.9945	50
1123	tonzonium bromide - MCF7	-0.337	2	-0.326	0.95256	0.9603	50
1124	dicycloverine - PC3	-0.006	2	0.328	0.95264	0.9568	50
1125	quinethazone - MCF7	-0.03	2	0.328	0.95366	0.9624	50
1126	ascorbic acid - MCF7	-0.34	2	-0.325	0.95463	0.981	50
1127	diphenylpyraline - PC3	-0.078	2	-0.324	0.95574	0.925	50
1128	PF-00875133-00 - MCF7	0.006	2	0.322	0.95976	0.9745	50
1129	alprenolol - MCF7	-0.279	2	-0.32	0.95988	0.9645	50
1130	pyrazinamide - MCF7	-0.31	2	-0.319	0.96129	0.9836	50
1131	ketotifen - MCF7	0.027	2	0.321	0.96141	0.9892	50
1132	boldine - MCF7	-0.05	2	0.32	0.96213	0.9256	50
1133	bezafibrate - MCF7	-0.338	2	-0.318	0.96244	0.984	50
1134	monocrotaline - MCF7	-0.304	2	-0.317	0.96338	0.988	50
1135	sulfaquinoxaline - MCF7	-0.023	2	0.318	0.96399	0.9821	50
1136	apramycin - MCF7	-0.035	2	0.318	0.96415	0.9774	50
1137	trimethylcolchicinic acid - MCF7	-0.295	2	-0.315	0.96646	0.9888	50
1138	ciprofibrate - MCF7	0.003	2	0.315	0.96797	0.9248	50
1139	epiandrosterone - MCF7	-0.32	2	-0.312	0.96896	0.9728	50
1140	norfloxacin - PC3	-0.278	2	-0.311	0.96972	0.9951	50
1141	CAY-10397 - PC3	-0.335	2	-0.311	0.96992	0.9828	50
1142	flucloxacillin - MCF7	0.007	2	0.312	0.97052	0.958	50
1143	lobelanidine - MCF7	-0.031	2	0.312	0.97085	0.9448	50
1144	cinchonine - MCF7	-0.082	2	-0.309	0.97183	0.9872	50
1145	epirizole - MCF7	-0.328	2	-0.309	0.97183	0.989	50
1146	hemicholinium - MCF7	-0.333	2	-0.308	0.97238	0.9898	50
1147	atractyloside - PC3	-0.307	2	-0.308	0.97262	0.9928	50
1148	PHA-00846566E - PC3	-0.288	2	-0.308	0.97292	0.9819	50
1149	methylergometrine - MCF7	-0.323	2	-0.305	0.97559	0.989	50
1150	baclofen - PC3	-0.332	2	-0.305	0.97596	0.9841	50
1151	terguride - HL60	-0.056	2	0.305	0.97692	0.973	50
1152	Prestwick-857 - MCF7	-0.081	2	-0.303	0.97737	0.9815	50
1153	nifurtimox - MCF7	-0.044	2	0.304	0.97749	0.9804	50
1154	amoxicillin - MCF7	-0.283	2	-0.303	0.97771	1	50
1155	tranexamic acid - PC3	-0.048	2	0.303	0.97815	0.9934	50
1156	15(S)-15-methylprostaglandin E2 - MCF7	-0.015	2	0.302	0.97869	0.9701	50
1157	mepyramine - MCF7	-0.33	2	-0.301	0.9791	0.9829	50
1158	gemfibrozil - PC3	-0.296	2	-0.297	0.98225	0.9844	50
1159	fenoprofen - PC3	-0.329	2	-0.296	0.9832	0.9949	50
1160	dioxybenzone - MCF7	-0.328	2	-0.293	0.98515	0.9769	50
1161	josamycin - MCF7	-0.327	2	-0.292	0.98606	0.9936	50
1162	rolipram - MCF7	-0.327	2	-0.291	0.98644	0.9835	50
1163	ursolic acid - PC3	-0.058	2	0.291	0.9869	0.9571	50
1164	atropine oxide - PC3	-0.326	2	-0.29	0.9873	0.9891	50
1165	semustine - PC3	-0.069	2	0.288	0.98887	0.9882	50
1166	apomorphine - MCF7	-0.324	2	-0.284	0.99123	1	50
1167	dicycloverine - MCF7	-0.323	2	-0.282	0.99179	1	50
1168	mepenzolate bromide - PC3	-0.098	2	0.281	0.99243	0.9784	50
1169	pindolol - PC3	-0.323	2	-0.281	0.99266	0.9871	50
1170	tamoxifen - MCF7	-0.153	4	-0.182	0.99572	1	50
1171	benzamil - PC3	-0.318	2	-0.271	0.99644	1	50
1172	procyclidine - MCF7	-0.314	2	-0.27	0.99686	1	50
1173	benperidol - MCF7	-0.303	2	-0.268	0.99738	1	50
1174	aceclofenac - PC3	-0.318	2	-0.266	0.99783	0.9936	50
1175	dizocilpine - MCF7	-0.311	2	-0.263	0.99861	1	50
1176	troleandomycin - PC3	-0.315	2	-0.258	0.9995	1	50
1177	thalidomide - PC3	-0.309	2	-0.254	0.99984	1	50
1178	SC-58125 - HL60	1	1	1	---	---	100
1179	3-hydroxy-DL-kynurenine - PC3	0.974	1	1	---	---	100
1180	aconitine - PC3	0.961	1	1	---	---	100
1181	famotidine - HL60	0.905	1	0.999	---	---	100
1182	alexidine - MCF7	-0.909	1	-0.998	---	---	100
1183	oleandomycin - HL60	0.89	1	0.998	---	---	100
1184	DL-PPMP - MCF7	0.889	1	0.998	---	---	100
1185	oxyphenbutazone - PC3	0.881	1	0.997	---	---	100
1186	felbinac - HL60	0.88	1	0.997	---	---	100
1187	berberine - HL60	0.866	1	0.996	---	---	100
1188	methapyrilene - PC3	-0.885	1	-0.996	---	---	100
1189	LY-294002 - ssMCF7	-0.88	1	-0.995	---	---	100
1190	demecarium bromide - HL60	0.862	1	0.995	---	---	100
1191	prenylamine - PC3	-0.878	1	-0.995	---	---	100
1192	crotamiton - PC3	0.856	1	0.995	---	---	100
1193	Prestwick-860 - HL60	-0.876	1	-0.994	---	---	100
1194	boldine - PC3	-0.873	1	-0.994	---	---	100
1195	raloxifene - ssMCF7	0.854	1	0.994	---	---	100
1196	asiaticoside - HL60	0.854	1	0.994	---	---	100
1197	corbadrine - HL60	0.847	1	0.993	---	---	100
1198	alimemazine - HL60	0.846	1	0.993	---	---	100
1199	puromycin - PC3	-0.863	1	-0.992	---	---	100
1200	nicardipine - PC3	-0.861	1	-0.992	---	---	100
1201	lumicolchicine - PC3	0.84	1	0.991	---	---	100
1202	piretanide - HL60	0.84	1	0.991	---	---	100
1203	aminophylline - HL60	-0.856	1	-0.991	---	---	100
1204	tyloxapol - PC3	-0.853	1	-0.99	---	---	100
1205	tamoxifen - ssMCF7	0.828	1	0.989	---	---	100
1206	biotin - PC3	0.827	1	0.989	---	---	100
1207	chloramphenicol - MCF7	-0.846	1	-0.989	---	---	100
1208	amoxapine - HL60	0.823	1	0.989	---	---	100
1209	isocarboxazid - HL60	0.822	1	0.989	---	---	100
1210	terbutaline - PC3	0.82	1	0.988	---	---	100
1211	aminohippuric acid - PC3	-0.841	1	-0.987	---	---	100
1212	azacyclonol - HL60	0.819	1	0.987	---	---	100
1213	betamethasone - PC3	0.818	1	0.987	---	---	100
1214	orciprenaline - HL60	-0.838	1	-0.986	---	---	100
1215	abamectin - HL60	0.817	1	0.986	---	---	100
1216	ergocalciferol - PC3	-0.838	1	-0.986	---	---	100
1217	N6-methyladenosine - PC3	0.817	1	0.986	---	---	100
1218	phenacetin - HL60	-0.838	1	-0.986	---	---	100
1219	STOCK1N-35696 - MCF7	0.817	1	0.986	---	---	100
1220	acemetacin - PC3	0.815	1	0.985	---	---	100
1221	edrophonium chloride - HL60	0.815	1	0.985	---	---	100
1222	flecainide - HL60	-0.835	1	-0.985	---	---	100
1223	oxytetracycline - MCF7	-0.834	1	-0.985	---	---	100
1224	(-)-isoprenaline - PC3	0.811	1	0.984	---	---	100
1225	pheneticillin - HL60	0.81	1	0.984	---	---	100
1226	tinidazole - HL60	-0.832	1	-0.984	---	---	100
1227	glimepiride - PC3	-0.831	1	-0.983	---	---	100
1228	alprenolol - PC3	0.807	1	0.983	---	---	100
1229	phenindione - HL60	-0.828	1	-0.983	---	---	100
1230	furazolidone - HL60	0.807	1	0.982	---	---	100
1231	12,13-EODE - MCF7	0.805	1	0.982	---	---	100
1232	3-acetylcoumarin - HL60	-0.825	1	-0.982	---	---	100
1233	epivincamine - PC3	-0.825	1	-0.982	---	---	100
1234	etoposide - PC3	-0.824	1	-0.982	---	---	100
1235	bicuculline - PC3	0.803	1	0.981	---	---	100
1236	halofantrine - HL60	0.803	1	0.981	---	---	100
1237	AH-23848 - PC3	-0.823	1	-0.981	---	---	100
1238	chlortalidone - PC3	0.799	1	0.98	---	---	100
1239	hesperidin - PC3	-0.82	1	-0.979	---	---	100
1240	1,5-isoquinolinediol - HL60	0.797	1	0.979	---	---	100
1241	thioperamide - PC3	0.795	1	0.979	---	---	100
1242	delsoline - HL60	0.794	1	0.978	---	---	100
1243	adenosine phosphate - PC3	0.794	1	0.978	---	---	100
1244	chloroquine - HL60	-0.818	1	-0.978	---	---	100
1245	bupropion - PC3	-0.816	1	-0.978	---	---	100
1246	fipexide - HL60	0.792	1	0.977	---	---	100
1247	iobenguane - HL60	-0.816	1	-0.977	---	---	100
1248	moroxydine - HL60	0.79	1	0.977	---	---	100
1249	(-)-atenolol - PC3	0.79	1	0.977	---	---	100
1250	10-methoxyharmalan - HL60	-0.815	1	-0.977	---	---	100
1251	orciprenaline - PC3	0.79	1	0.976	---	---	100
1252	Prestwick-972 - HL60	0.79	1	0.976	---	---	100
1253	piromidic acid - HL60	-0.815	1	-0.976	---	---	100
1254	artemisinin - HL60	-0.815	1	-0.976	---	---	100
1255	digoxigenin - PC3	0.789	1	0.976	---	---	100
1256	oxedrine - HL60	0.789	1	0.976	---	---	100
1257	novobiocin - SKMEL5	0.788	1	0.976	---	---	100
1258	clorsulon - HL60	0.788	1	0.975	---	---	100
1259	carbachol - HL60	-0.812	1	-0.975	---	---	100
1260	iopromide - PC3	0.787	1	0.975	---	---	100
1261	Prestwick-689 - PC3	0.787	1	0.975	---	---	100
1262	lasalocid - HL60	-0.812	1	-0.975	---	---	100
1263	tetraethylenepentamine - HL60	-0.812	1	-0.975	---	---	100
1264	hydrocortisone - PC3	0.787	1	0.974	---	---	100
1265	atropine methonitrate - HL60	0.784	1	0.974	---	---	100
1266	clorgiline - HL60	0.784	1	0.974	---	---	100
1267	sulfacetamide - MCF7	-0.808	1	-0.973	---	---	100
1268	zidovudine - HL60	0.781	1	0.972	---	---	100
1269	adipiodone - HL60	0.78	1	0.972	---	---	100
1270	isoflupredone - PC3	0.779	1	0.972	---	---	100
1271	mephenytoin - HL60	0.779	1	0.971	---	---	100
1272	cyproterone - PC3	0.779	1	0.971	---	---	100
1273	10-methoxyharmalan - PC3	0.779	1	0.971	---	---	100
1274	glibenclamide - HL60	0.778	1	0.971	---	---	100
1275	luteolin - PC3	-0.806	1	-0.971	---	---	100
1276	ketanserin - PC3	-0.805	1	-0.97	---	---	100
1277	debrisoquine - PC3	0.776	1	0.97	---	---	100
1278	5186223 - MCF7	0.776	1	0.97	---	---	100
1279	aconitine - HL60	0.776	1	0.97	---	---	100
1280	chlorzoxazone - HL60	0.776	1	0.97	---	---	100
1281	mefexamide - HL60	0.776	1	0.969	---	---	100
1282	dyclonine - PC3	-0.801	1	-0.968	---	---	100
1283	piretanide - PC3	0.772	1	0.968	---	---	100
1284	copper sulfate - PC3	-0.801	1	-0.968	---	---	100
1285	0297417-0002B - PC3	-0.8	1	-0.968	---	---	100
1286	dexamethasone - ssMCF7	0.772	1	0.968	---	---	100
1287	monocrotaline - HL60	0.772	1	0.967	---	---	100
1288	ciprofibrate - HL60	0.771	1	0.967	---	---	100
1289	testosterone - PC3	0.77	1	0.967	---	---	100
1290	guaifenesin - HL60	-0.799	1	-0.966	---	---	100
1291	bepridil - HL60	0.77	1	0.966	---	---	100
1292	piroxicam - PC3	-0.798	1	-0.966	---	---	100
1293	meclozine - HL60	0.769	1	0.966	---	---	100
1294	kanamycin - HL60	0.769	1	0.966	---	---	100
1295	clofilium tosylate - PC3	0.768	1	0.966	---	---	100
1296	iopanoic acid - PC3	-0.798	1	-0.966	---	---	100
1297	scopolamine - HL60	0.768	1	0.966	---	---	100
1298	(-)-MK-801 - HL60	0.767	1	0.965	---	---	100
1299	theobromine - HL60	0.766	1	0.965	---	---	100
1300	lobeline - HL60	0.766	1	0.964	---	---	100
1301	digoxin - PC3	0.766	1	0.964	---	---	100
1302	sulconazole - PC3	-0.796	1	-0.964	---	---	100
1303	caffeic acid - MCF7	0.765	1	0.964	---	---	100
1304	chlorphenesin - PC3	-0.795	1	-0.964	---	---	100
1305	cicloheximide - HL60	0.765	1	0.964	---	---	100
1306	clobetasol - PC3	0.765	1	0.963	---	---	100
1307	ganciclovir - HL60	-0.795	1	-0.963	---	---	100
1308	antimycin A - HL60	0.763	1	0.963	---	---	100
1309	zoxazolamine - PC3	-0.794	1	-0.963	---	---	100
1310	nomifensine - HL60	0.763	1	0.962	---	---	100
1311	cytochalasin B - MCF7	-0.794	1	-0.962	---	---	100
1312	piromidic acid - PC3	0.763	1	0.962	---	---	100
1313	ioversol - HL60	-0.793	1	-0.962	---	---	100
1314	nilutamide - HL60	0.761	1	0.962	---	---	100
1315	iopamidol - PC3	0.761	1	0.961	---	---	100
1316	methyldopa - PC3	0.761	1	0.961	---	---	100
1317	moxonidine - MCF7	-0.792	1	-0.961	---	---	100
1318	Prestwick-559 - HL60	-0.792	1	-0.961	---	---	100
1319	doxepin - MCF7	0.76	1	0.961	---	---	100
1320	scopoletin - MCF7	-0.792	1	-0.961	---	---	100
1321	vanoxerine - PC3	0.759	1	0.96	---	---	100
1322	harmol - HL60	-0.791	1	-0.96	---	---	100
1323	chlorzoxazone - PC3	-0.791	1	-0.96	---	---	100
1324	ioversol - PC3	0.759	1	0.96	---	---	100
1325	betaxolol - PC3	-0.791	1	-0.96	---	---	100
1326	isocorydine - PC3	0.756	1	0.96	---	---	100
1327	naringenin - HL60	0.756	1	0.959	---	---	100
1328	clopamide - HL60	0.755	1	0.959	---	---	100
1329	terazosin - HL60	0.755	1	0.959	---	---	100
1330	mifepristone - HL60	0.753	1	0.958	---	---	100
1331	carbarsone - PC3	0.753	1	0.958	---	---	100
1332	hydrocotarnine - HL60	0.753	1	0.958	---	---	100
1333	pentoxyverine - PC3	-0.787	1	-0.957	---	---	100
1334	esculetin - HL60	0.752	1	0.957	---	---	100
1335	colecalciferol - PC3	-0.787	1	-0.957	---	---	100
1336	levobunolol - HL60	-0.786	1	-0.957	---	---	100
1337	nimodipine - PC3	0.75	1	0.956	---	---	100
1338	metixene - HL60	0.75	1	0.956	---	---	100
1339	pyrithyldione - PC3	0.75	1	0.956	---	---	100
1340	dipivefrine - PC3	0.749	1	0.956	---	---	100
1341	labetalol - HL60	-0.785	1	-0.956	---	---	100
1342	Prestwick-972 - MCF7	-0.785	1	-0.955	---	---	100
1343	iodixanol - HL60	0.748	1	0.954	---	---	100
1344	nimesulide - PC3	0.747	1	0.954	---	---	100
1345	crotamiton - HL60	-0.784	1	-0.954	---	---	100
1346	H-89 - MCF7	-0.783	1	-0.953	---	---	100
1347	glycocholic acid - PC3	-0.783	1	-0.953	---	---	100
1348	dextromethorphan - PC3	-0.783	1	-0.953	---	---	100
1349	bemegride - PC3	-0.783	1	-0.953	---	---	100
1350	danazol - PC3	0.746	1	0.953	---	---	100
1351	tetramisole - HL60	-0.783	1	-0.953	---	---	100
1352	isosorbide - HL60	0.746	1	0.952	---	---	100
1353	cinchonidine - PC3	-0.781	1	-0.951	---	---	100
1354	labetalol - PC3	0.744	1	0.951	---	---	100
1355	fasudil - MCF7	0.744	1	0.95	---	---	100
1356	Prestwick-857 - HL60	0.744	1	0.95	---	---	100
1357	mevalolactone - MCF7	-0.781	1	-0.95	---	---	100
1358	2-aminobenzenesulfonamide - PC3	0.743	1	0.95	---	---	100
1359	prazosin - PC3	0.743	1	0.95	---	---	100
1360	indoprofen - HL60	0.743	1	0.949	---	---	100
1361	betonicine - HL60	0.741	1	0.948	---	---	100
1362	latamoxef - PC3	-0.777	1	-0.948	---	---	100
1363	metoprolol - PC3	0.741	1	0.948	---	---	100
1364	ciclosporin - PC3	0.74	1	0.947	---	---	100
1365	daunorubicin - PC3	-0.777	1	-0.947	---	---	100
1366	ciprofibrate - PC3	-0.777	1	-0.947	---	---	100
1367	scopolamine - PC3	0.74	1	0.947	---	---	100
1368	rolipram - PC3	0.738	1	0.947	---	---	100
1369	metyrapone - PC3	-0.776	1	-0.946	---	---	100
1370	epiandrosterone - HL60	0.737	1	0.946	---	---	100
1371	gefitinib - HL60	0.737	1	0.946	---	---	100
1372	bacampicillin - PC3	-0.775	1	-0.945	---	---	100
1373	oxamic acid - MCF7	0.737	1	0.945	---	---	100
1374	asiaticoside - PC3	0.736	1	0.945	---	---	100
1375	salsolidin - HL60	-0.775	1	-0.945	---	---	100
1376	cyanocobalamin - PC3	-0.775	1	-0.945	---	---	100
1377	Prestwick-692 - PC3	0.736	1	0.945	---	---	100
1378	propoxycaine - PC3	0.736	1	0.945	---	---	100
1379	dexpropranolol - PC3	0.736	1	0.944	---	---	100
1380	triflupromazine - PC3	0.735	1	0.944	---	---	100
1381	tanespimycin - ssMCF7	-0.773	1	-0.944	---	---	100
1382	Prestwick-983 - HL60	0.735	1	0.944	---	---	100
1383	etifenin - HL60	-0.773	1	-0.944	---	---	100
1384	methylprednisolone - PC3	0.735	1	0.944	---	---	100
1385	bretylium tosilate - HL60	0.734	1	0.943	---	---	100
1386	fusaric acid - PC3	0.734	1	0.943	---	---	100
1387	myricetin - PC3	-0.773	1	-0.943	---	---	100
1388	captopril - HL60	0.733	1	0.942	---	---	100
1389	trimethadione - PC3	-0.772	1	-0.942	---	---	100
1390	quinidine - PC3	-0.772	1	-0.941	---	---	100
1391	probenecid - HL60	0.731	1	0.941	---	---	100
1392	BW-B70C - MCF7	0.731	1	0.94	---	---	100
1393	mephenytoin - PC3	0.73	1	0.94	---	---	100
1394	doxycycline - PC3	0.73	1	0.94	---	---	100
1395	sanguinarine - MCF7	-0.77	1	-0.94	---	---	100
1396	dl-alpha tocopherol - PC3	-0.77	1	-0.94	---	---	100
1397	vancomycin - PC3	0.728	1	0.939	---	---	100
1398	moxonidine - PC3	0.728	1	0.939	---	---	100
1399	chlortetracycline - HL60	0.727	1	0.938	---	---	100
1400	dexverapamil - MCF7	-0.769	1	-0.938	---	---	100
1401	clenbuterol - PC3	0.727	1	0.938	---	---	100
1402	acetazolamide - PC3	0.727	1	0.938	---	---	100
1403	tiabendazole - HL60	-0.769	1	-0.938	---	---	100
1404	tetraethylenepentamine - ssMCF7	-0.769	1	-0.938	---	---	100
1405	pentetrazol - PC3	-0.769	1	-0.938	---	---	100
1406	CAY-10397 - MCF7	-0.768	1	-0.938	---	---	100
1407	clofazimine - PC3	0.726	1	0.937	---	---	100
1408	chlormezanone - PC3	0.726	1	0.937	---	---	100
1409	tiaprofenic acid - HL60	-0.767	1	-0.937	---	---	100
1410	carmustine - PC3	-0.766	1	-0.937	---	---	100
1411	metolazone - HL60	0.725	1	0.937	---	---	100
1412	spiperone - HL60	-0.765	1	-0.935	---	---	100
1413	betahistine - HL60	-0.765	1	-0.934	---	---	100
1414	fluorometholone - PC3	0.722	1	0.934	---	---	100
1415	ethisterone - HL60	0.722	1	0.934	---	---	100
1416	dexibuprofen - PC3	-0.763	1	-0.934	---	---	100
1417	ceforanide - HL60	0.721	1	0.933	---	---	100
1418	pentamidine - HL60	-0.762	1	-0.933	---	---	100
1419	methazolamide - PC3	-0.762	1	-0.932	---	---	100
1420	trimethadione - HL60	-0.762	1	-0.932	---	---	100
1421	etynodiol - HL60	0.719	1	0.932	---	---	100
1422	cefalotin - PC3	0.718	1	0.931	---	---	100
1423	progesterone - HL60	-0.761	1	-0.931	---	---	100
1424	benzamil - HL60	0.717	1	0.931	---	---	100
1425	pyridoxine - HL60	-0.761	1	-0.931	---	---	100
1426	phenoxybenzamine - PC3	-0.76	1	-0.93	---	---	100
1427	metitepine - PC3	0.716	1	0.93	---	---	100
1428	hydroquinine - HL60	-0.759	1	-0.929	---	---	100
1429	alfuzosin - PC3	-0.759	1	-0.929	---	---	100
1430	timolol - PC3	0.715	1	0.929	---	---	100
1431	butoconazole - HL60	-0.759	1	-0.929	---	---	100
1432	cefmetazole - HL60	0.715	1	0.928	---	---	100
1433	chlorpropamide - PC3	-0.759	1	-0.928	---	---	100
1434	cefapirin - HL60	0.715	1	0.928	---	---	100
1435	reserpine - HL60	-0.759	1	-0.928	---	---	100
1436	PF-00539745-00 - MCF7	0.714	1	0.927	---	---	100
1437	colistin - HL60	-0.757	1	-0.926	---	---	100
1438	glycocholic acid - HL60	0.713	1	0.926	---	---	100
1439	nifurtimox - PC3	-0.756	1	-0.926	---	---	100
1440	alfadolone - PC3	-0.755	1	-0.925	---	---	100
1441	terbutaline - HL60	-0.755	1	-0.925	---	---	100
1442	meglumine - HL60	0.71	1	0.925	---	---	100
1443	zaprinast - PC3	0.71	1	0.924	---	---	100
1444	capsaicin - HL60	-0.754	1	-0.924	---	---	100
1445	isoetarine - PC3	0.709	1	0.924	---	---	100
1446	pyridoxine - PC3	-0.754	1	-0.923	---	---	100
1447	vigabatrin - MCF7	0.709	1	0.923	---	---	100
1448	5213008 - MCF7	-0.753	1	-0.923	---	---	100
1449	cloxacillin - HL60	0.708	1	0.923	---	---	100
1450	diperodon - PC3	-0.753	1	-0.923	---	---	100
1451	fludroxycortide - HL60	0.707	1	0.922	---	---	100
1452	neostigmine bromide - HL60	-0.753	1	-0.922	---	---	100
1453	dirithromycin - HL60	0.707	1	0.922	---	---	100
1454	L-methionine sulfoximine - HL60	-0.753	1	-0.922	---	---	100
1455	apigenin - PC3	-0.752	1	-0.921	---	---	100
1456	fenoterol - MCF7	0.705	1	0.921	---	---	100
1457	meclozine - PC3	-0.751	1	-0.92	---	---	100
1458	benperidol - HL60	-0.75	1	-0.92	---	---	100
1459	piperlongumine - HL60	-0.75	1	-0.919	---	---	100
1460	procainamide - HL60	0.705	1	0.919	---	---	100
1461	dequalinium chloride - PC3	-0.749	1	-0.919	---	---	100
1462	butacaine - HL60	0.703	1	0.918	---	---	100
1463	omeprazole - PC3	-0.747	1	-0.917	---	---	100
1464	butyl hydroxybenzoate - PC3	-0.747	1	-0.917	---	---	100
1465	harmine - PC3	-0.746	1	-0.916	---	---	100
1466	biotin - HL60	-0.746	1	-0.916	---	---	100
1467	doxazosin - HL60	-0.746	1	-0.916	---	---	100
1468	pramocaine - PC3	0.7	1	0.915	---	---	100
1469	protriptyline - PC3	-0.745	1	-0.915	---	---	100
1470	hydrastinine - HL60	0.7	1	0.915	---	---	100
1471	noretynodrel - HL60	-0.745	1	-0.915	---	---	100
1472	thapsigargin - PC3	-0.745	1	-0.915	---	---	100
1473	harman - PC3	0.699	1	0.914	---	---	100
1474	danazol - HL60	0.699	1	0.914	---	---	100
1475	ethaverine - HL60	-0.745	1	-0.914	---	---	100
1476	ketoconazole - PC3	0.698	1	0.914	---	---	100
1477	noretynodrel - PC3	0.698	1	0.913	---	---	100
1478	amprolium - HL60	0.698	1	0.913	---	---	100
1479	procyclidine - HL60	-0.744	1	-0.913	---	---	100
1480	antazoline - PC3	0.697	1	0.913	---	---	100
1481	dosulepin - HL60	-0.743	1	-0.912	---	---	100
1482	scoulerine - HL60	-0.742	1	-0.911	---	---	100
1483	tubocurarine chloride - HL60	-0.742	1	-0.911	---	---	100
1484	N-acetyl-L-leucine - PC3	0.694	1	0.911	---	---	100
1485	carbimazole - HL60	-0.742	1	-0.911	---	---	100
1486	dydrogesterone - PC3	-0.742	1	-0.91	---	---	100
1487	methoxamine - HL60	0.694	1	0.91	---	---	100
1488	serotonin - HL60	-0.742	1	-0.91	---	---	100
1489	oxytetracycline - HL60	-0.742	1	-0.91	---	---	100
1490	probucol - HL60	0.694	1	0.909	---	---	100
1491	aciclovir - HL60	0.694	1	0.909	---	---	100
1492	iobenguane - PC3	-0.741	1	-0.909	---	---	100
1493	azlocillin - PC3	-0.741	1	-0.909	---	---	100
1494	pregnenolone - PC3	0.694	1	0.909	---	---	100
1495	scriptaid - MCF7	-0.741	1	-0.909	---	---	100
1496	doxazosin - PC3	-0.74	1	-0.909	---	---	100
1497	sisomicin - HL60	-0.739	1	-0.908	---	---	100
1498	(+)-isoprenaline - HL60	0.692	1	0.908	---	---	100
1499	ricinine - PC3	-0.739	1	-0.907	---	---	100
1500	MG-262 - MCF7	-0.738	1	-0.906	---	---	100
1501	amiprilose - PC3	0.69	1	0.905	---	---	100
1502	fursultiamine - PC3	-0.738	1	-0.905	---	---	100
1503	sisomicin - PC3	0.689	1	0.905	---	---	100
1504	guanethidine - HL60	0.689	1	0.905	---	---	100
1505	harmol - PC3	-0.737	1	-0.904	---	---	100
1506	cefotetan - PC3	0.688	1	0.904	---	---	100
1507	spironolactone - HL60	0.688	1	0.904	---	---	100
1508	oxolamine - PC3	0.687	1	0.904	---	---	100
1509	pyrazinamide - HL60	-0.735	1	-0.903	---	---	100
1510	cyclopentolate - PC3	-0.735	1	-0.903	---	---	100
1511	tobramycin - PC3	0.686	1	0.902	---	---	100
1512	wortmannin - ssMCF7	-0.735	1	-0.902	---	---	100
1513	furosemide - HL60	0.685	1	0.902	---	---	100
1514	isopropamide iodide - PC3	-0.733	1	-0.901	---	---	100
1515	levocabastine - PC3	0.683	1	0.9	---	---	100
1516	simvastatin - PC3	0.683	1	0.9	---	---	100
1517	estropipate - PC3	0.683	1	0.9	---	---	100
1518	1,4-chrysenequinone - PC3	-0.732	1	-0.9	---	---	100
1519	memantine - PC3	0.683	1	0.899	---	---	100
1520	reserpine - PC3	0.683	1	0.899	---	---	100
1521	etamivan - HL60	0.682	1	0.899	---	---	100
1522	mometasone - HL60	-0.732	1	-0.899	---	---	100
1523	naftifine - PC3	0.682	1	0.899	---	---	100
1524	diloxanide - HL60	-0.732	1	-0.899	---	---	100
1525	cefsulodin - PC3	0.682	1	0.899	---	---	100
1526	simvastatin - HL60	-0.732	1	-0.898	---	---	100
1527	thiostrepton - HL60	-0.732	1	-0.898	---	---	100
1528	dimethadione - PC3	-0.732	1	-0.898	---	---	100
1529	ipratropium bromide - PC3	0.682	1	0.898	---	---	100
1530	triflusal - HL60	-0.731	1	-0.898	---	---	100
1531	oxybuprocaine - PC3	-0.731	1	-0.897	---	---	100
1532	bendroflumethiazide - HL60	-0.73	1	-0.897	---	---	100
1533	hydroquinine - PC3	0.681	1	0.896	---	---	100
1534	pentoxyverine - HL60	-0.73	1	-0.896	---	---	100
1535	benzydamine - HL60	0.68	1	0.896	---	---	100
1536	iproniazid - HL60	0.679	1	0.895	---	---	100
1537	tolfenamic acid - HL60	-0.729	1	-0.895	---	---	100
1538	pinacidil - PC3	0.679	1	0.895	---	---	100
1539	imipenem - HL60	-0.728	1	-0.894	---	---	100
1540	PHA-00846566E - MCF7	-0.728	1	-0.894	---	---	100
1541	mesoridazine - HL60	0.678	1	0.894	---	---	100
1542	flurbiprofen - HL60	-0.727	1	-0.893	---	---	100
1543	pheneticillin - PC3	0.677	1	0.893	---	---	100
1544	dioxybenzone - PC3	0.676	1	0.893	---	---	100
1545	lansoprazole - PC3	-0.726	1	-0.892	---	---	100
1546	flucytosine - HL60	-0.726	1	-0.892	---	---	100
1547	tetroquinone - PC3	0.675	1	0.892	---	---	100
1548	celastrol - MCF7	-0.726	1	-0.891	---	---	100
1549	ebselen - MCF7	-0.725	1	-0.89	---	---	100
1550	folic acid - PC3	0.672	1	0.889	---	---	100
1551	altretamine - PC3	0.672	1	0.889	---	---	100
1552	gibberellic acid - PC3	-0.724	1	-0.889	---	---	100
1553	minocycline - PC3	0.671	1	0.889	---	---	100
1554	15-delta prostaglandin J2 - SKMEL5	-0.723	1	-0.888	---	---	100
1555	exemestane - MCF7	-0.723	1	-0.888	---	---	100
1556	altizide - PC3	0.67	1	0.888	---	---	100
1557	tetracycline - HL60	-0.722	1	-0.887	---	---	100
1558	trifluridine - PC3	0.669	1	0.887	---	---	100
1559	luteolin - HL60	-0.722	1	-0.886	---	---	100
1560	TTNPB - PC3	0.669	1	0.886	---	---	100
1561	bupivacaine - PC3	-0.722	1	-0.886	---	---	100
1562	deptropine - PC3	-0.722	1	-0.886	---	---	100
1563	netilmicin - HL60	0.668	1	0.886	---	---	100
1564	loracarbef - PC3	-0.721	1	-0.885	---	---	100
1565	atropine methonitrate - MCF7	-0.721	1	-0.885	---	---	100
1566	naftifine - HL60	0.667	1	0.885	---	---	100
1567	5149715 - MCF7	0.667	1	0.885	---	---	100
1568	remoxipride - PC3	-0.72	1	-0.884	---	---	100
1569	hexestrol - PC3	0.666	1	0.883	---	---	100
1570	pyrantel - HL60	0.666	1	0.883	---	---	100
1571	tetroquinone - HL60	-0.72	1	-0.883	---	---	100
1572	octopamine - PC3	0.665	1	0.883	---	---	100
1573	tetraethylenepentamine - PC3	-0.719	1	-0.882	---	---	100
1574	R-atenolol - HL60	-0.719	1	-0.882	---	---	100
1575	sulfadoxine - PC3	-0.719	1	-0.881	---	---	100
1576	niridazole - HL60	-0.719	1	-0.881	---	---	100
1577	0225151-0000 - MCF7	-0.718	1	-0.88	---	---	100
1578	cyanocobalamin - HL60	0.662	1	0.88	---	---	100
1579	HNMPA-(AM)3 - PC3	-0.718	1	-0.88	---	---	100
1580	pipemidic acid - MCF7	0.662	1	0.88	---	---	100
1581	bisacodyl - HL60	-0.717	1	-0.879	---	---	100
1582	suxibuzone - PC3	0.661	1	0.879	---	---	100
1583	5140203 - MCF7	-0.717	1	-0.879	---	---	100
1584	ebselen - PC3	-0.717	1	-0.878	---	---	100
1585	adenosine phosphate - HL60	0.66	1	0.878	---	---	100
1586	R-atenolol - PC3	0.658	1	0.876	---	---	100
1587	esculin - PC3	-0.715	1	-0.876	---	---	100
1588	nadide - PC3	0.658	1	0.876	---	---	100
1589	N-phenylanthranilic acid - MCF7	0.657	1	0.876	---	---	100
1590	latamoxef - HL60	-0.714	1	-0.876	---	---	100
1591	sulfasalazine - PC3	-0.714	1	-0.875	---	---	100
1592	iohexol - PC3	0.656	1	0.875	---	---	100
1593	tetracaine - HL60	-0.714	1	-0.875	---	---	100
1594	oligomycin - MCF7	-0.713	1	-0.874	---	---	100
1595	cycloserine - PC3	-0.713	1	-0.874	---	---	100
1596	gabapentin - PC3	0.655	1	0.873	---	---	100
1597	naftopidil - MCF7	-0.713	1	-0.873	---	---	100
1598	ethionamide - MCF7	0.654	1	0.873	---	---	100
1599	vinpocetine - HL60	0.653	1	0.872	---	---	100
1600	ampicillin - HL60	0.653	1	0.872	---	---	100
1601	suloctidil - PC3	-0.712	1	-0.871	---	---	100
1602	ursodeoxycholic acid - PC3	0.652	1	0.871	---	---	100
1603	6-azathymine - PC3	0.652	1	0.871	---	---	100
1604	dinoprost - PC3	-0.711	1	-0.87	---	---	100
1605	Prestwick-675 - MCF7	0.65	1	0.869	---	---	100
1606	fisetin - PC3	-0.71	1	-0.869	---	---	100
1607	mefexamide - PC3	0.65	1	0.869	---	---	100
1608	calycanthine - HL60	0.65	1	0.869	---	---	100
1609	cisapride - HL60	-0.71	1	-0.869	---	---	100
1610	epiandrosterone - PC3	0.649	1	0.869	---	---	100
1611	procainamide - PC3	-0.709	1	-0.868	---	---	100
1612	harmaline - HL60	0.648	1	0.867	---	---	100
1613	molsidomine - HL60	-0.708	1	-0.867	---	---	100
1614	prasterone - HL60	-0.708	1	-0.866	---	---	100
1615	sulfadimidine - HL60	-0.708	1	-0.866	---	---	100
1616	harpagoside - PC3	0.646	1	0.866	---	---	100
1617	lynestrenol - HL60	0.645	1	0.865	---	---	100
1618	6-benzylaminopurine - PC3	0.645	1	0.865	---	---	100
1619	fenbendazole - HL60	0.645	1	0.865	---	---	100
1620	fipexide - MCF7	-0.707	1	-0.864	---	---	100
1621	dosulepin - PC3	-0.707	1	-0.863	---	---	100
1622	ajmaline - HL60	0.644	1	0.863	---	---	100
1623	hexamethonium bromide - HL60	0.643	1	0.863	---	---	100
1624	pararosaniline - MCF7	-0.706	1	-0.862	---	---	100
1625	naringin - PC3	-0.706	1	-0.862	---	---	100
1626	pentetic acid - HL60	0.643	1	0.862	---	---	100
1627	atovaquone - HL60	-0.706	1	-0.861	---	---	100
1628	azapropazone - PC3	0.641	1	0.861	---	---	100
1629	Trolox C - PC3	0.641	1	0.861	---	---	100
1630	cinnarizine - PC3	0.641	1	0.86	---	---	100
1631	levonorgestrel - HL60	-0.705	1	-0.86	---	---	100
1632	pempidine - PC3	0.641	1	0.86	---	---	100
1633	delsoline - PC3	-0.704	1	-0.86	---	---	100
1634	tropine - PC3	0.64	1	0.86	---	---	100
1635	xylometazoline - HL60	-0.704	1	-0.86	---	---	100
1636	cefoperazone - MCF7	0.638	1	0.859	---	---	100
1637	mepacrine - HL60	-0.704	1	-0.858	---	---	100
1638	florfenicol - HL60	-0.704	1	-0.858	---	---	100
1639	pirenperone - HL60	0.637	1	0.857	---	---	100
1640	fenbufen - HL60	0.637	1	0.857	---	---	100
1641	TTNPB - MCF7	0.637	1	0.857	---	---	100
1642	iloprost - SKMEL5	0.636	1	0.857	---	---	100
1643	valdecoxib - MCF7	-0.702	1	-0.857	---	---	100
1644	mecamylamine - PC3	0.636	1	0.856	---	---	100
1645	rolipram - HL60	-0.702	1	-0.856	---	---	100
1646	cetirizine - HL60	-0.702	1	-0.855	---	---	100
1647	tiletamine - PC3	0.634	1	0.855	---	---	100
1648	propafenone - HL60	0.633	1	0.855	---	---	100
1649	benzathine benzylpenicillin - PC3	0.633	1	0.854	---	---	100
1650	phenyl biguanide - MCF7	0.633	1	0.854	---	---	100
1651	nicergoline - HL60	0.633	1	0.854	---	---	100
1652	cefoperazone - PC3	0.633	1	0.853	---	---	100
1653	copper sulfate - ssMCF7	0.632	1	0.853	---	---	100
1654	Prestwick-1082 - PC3	0.632	1	0.852	---	---	100
1655	atovaquone - PC3	-0.699	1	-0.852	---	---	100
1656	talampicillin - PC3	0.631	1	0.852	---	---	100
1657	kaempferol - PC3	0.631	1	0.852	---	---	100
1658	econazole - PC3	0.63	1	0.852	---	---	100
1659	omeprazole - HL60	-0.698	1	-0.851	---	---	100
1660	diltiazem - HL60	0.629	1	0.851	---	---	100
1661	ganciclovir - PC3	-0.698	1	-0.851	---	---	100
1662	butein - PC3	-0.698	1	-0.851	---	---	100
1663	metergoline - PC3	0.628	1	0.85	---	---	100
1664	isopropamide iodide - HL60	0.627	1	0.849	---	---	100
1665	palmatine - PC3	-0.697	1	-0.849	---	---	100
1666	ciclopirox - HL60	-0.697	1	-0.849	---	---	100
1667	tridihexethyl - HL60	0.626	1	0.849	---	---	100
1668	nifenazone - HL60	0.626	1	0.848	---	---	100
1669	sulfaguanidine - HL60	0.626	1	0.848	---	---	100
1670	(+/-)-catechin - PC3	-0.697	1	-0.848	---	---	100
1671	ascorbic acid - HL60	0.625	1	0.848	---	---	100
1672	androsterone - PC3	0.625	1	0.848	---	---	100
1673	meglumine - PC3	0.625	1	0.848	---	---	100
1674	nocodazole - HL60	-0.696	1	-0.848	---	---	100
1675	levamisole - PC3	-0.696	1	-0.847	---	---	100
1676	chlorogenic acid - HL60	0.625	1	0.847	---	---	100
1677	imatinib - PC3	-0.696	1	-0.847	---	---	100
1678	butein - MCF7	0.624	1	0.846	---	---	100
1679	carbinoxamine - PC3	0.623	1	0.846	---	---	100
1680	dexpanthenol - PC3	0.622	1	0.845	---	---	100
1681	biotin - MCF7	-0.694	1	-0.845	---	---	100
1682	triprolidine - HL60	0.621	1	0.844	---	---	100
1683	testosterone - HL60	0.621	1	0.844	---	---	100
1684	trimethylcolchicinic acid - PC3	0.621	1	0.844	---	---	100
1685	amphotericin B - PC3	-0.694	1	-0.843	---	---	100
1686	domperidone - PC3	0.62	1	0.843	---	---	100
1687	fenoterol - HL60	0.62	1	0.843	---	---	100
1688	dicloxacillin - PC3	-0.693	1	-0.842	---	---	100
1689	pancuronium bromide - PC3	0.618	1	0.842	---	---	100
1690	estrone - HL60	0.618	1	0.842	---	---	100
1691	cyclopenthiazide - PC3	0.618	1	0.842	---	---	100
1692	convolamine - HL60	0.618	1	0.842	---	---	100
1693	sulfinpyrazone - HL60	-0.693	1	-0.842	---	---	100
1694	arecoline - PC3	0.617	1	0.842	---	---	100
1695	chlorphenamine - HL60	0.617	1	0.841	---	---	100
1696	vinblastine - PC3	0.617	1	0.841	---	---	100
1697	pentetic acid - PC3	0.617	1	0.841	---	---	100
1698	caffeic acid - PC3	-0.692	1	-0.841	---	---	100
1699	cloperastine - HL60	-0.692	1	-0.84	---	---	100
1700	retrorsine - PC3	-0.691	1	-0.84	---	---	100
1701	betamethasone - MCF7	-0.691	1	-0.84	---	---	100
1702	fusaric acid - HL60	0.616	1	0.84	---	---	100
1703	calcium pantothenate - PC3	0.616	1	0.84	---	---	100
1704	propranolol - PC3	0.616	1	0.84	---	---	100
1705	calycanthine - PC3	0.615	1	0.839	---	---	100
1706	nitrofural - PC3	-0.691	1	-0.839	---	---	100
1707	picrotoxinin - PC3	0.613	1	0.838	---	---	100
1708	isotretinoin - PC3	-0.69	1	-0.838	---	---	100
1709	strophanthidin - HL60	-0.689	1	-0.837	---	---	100
1710	cefepime - PC3	0.612	1	0.837	---	---	100
1711	demecarium bromide - PC3	0.611	1	0.836	---	---	100
1712	neomycin - HL60	0.61	1	0.836	---	---	100
1713	piperidolate - HL60	0.61	1	0.836	---	---	100
1714	atracurium besilate - PC3	0.61	1	0.836	---	---	100
1715	spaglumic acid - MCF7	0.608	1	0.835	---	---	100
1716	colchicine - PC3	-0.687	1	-0.835	---	---	100
1717	AG-028671 - MCF7	0.606	1	0.833	---	---	100
1718	spaglumic acid - HL60	0.605	1	0.833	---	---	100
1719	fosfosal - HL60	-0.686	1	-0.833	---	---	100
1720	oxamniquine - PC3	0.605	1	0.832	---	---	100
1721	pipenzolate bromide - PC3	0.605	1	0.832	---	---	100
1722	nomegestrol - PC3	0.605	1	0.832	---	---	100
1723	sulfamonomethoxine - PC3	0.605	1	0.832	---	---	100
1724	alverine - MCF7	0.605	1	0.832	---	---	100
1725	probucol - PC3	0.604	1	0.831	---	---	100
1726	vitexin - PC3	0.604	1	0.831	---	---	100
1727	indoprofen - PC3	-0.685	1	-0.831	---	---	100
1728	chlortalidone - HL60	-0.685	1	-0.83	---	---	100
1729	sulindac sulfide - MCF7	-0.685	1	-0.83	---	---	100
1730	idoxuridine - HL60	0.601	1	0.83	---	---	100
1731	sulfasalazine - HL60	-0.685	1	-0.83	---	---	100
1732	galantamine - HL60	-0.684	1	-0.83	---	---	100
1733	mesalazine - PC3	0.6	1	0.829	---	---	100
1734	benfluorex - PC3	0.6	1	0.829	---	---	100
1735	etamsylate - PC3	-0.684	1	-0.829	---	---	100
1736	metrifonate - HL60	0.599	1	0.829	---	---	100
1737	piperlongumine - MCF7	-0.684	1	-0.828	---	---	100
1738	dantrolene - HL60	0.599	1	0.828	---	---	100
1739	ketotifen - PC3	0.597	1	0.828	---	---	100
1740	mebeverine - HL60	-0.684	1	-0.828	---	---	100
1741	nystatin - MCF7	0.596	1	0.828	---	---	100
1742	paclitaxel - HL60	0.596	1	0.828	---	---	100
1743	dl-alpha tocopherol - HL60	0.595	1	0.827	---	---	100
1744	alpha-estradiol - ssMCF7	-0.682	1	-0.827	---	---	100
1745	diperodon - MCF7	-0.682	1	-0.827	---	---	100
1746	hydrastine hydrochloride - HL60	0.594	1	0.827	---	---	100
1747	ramifenazone - PC3	-0.682	1	-0.826	---	---	100
1748	oxprenolol - PC3	-0.682	1	-0.826	---	---	100
1749	zuclopenthixol - PC3	0.592	1	0.825	---	---	100
1750	nefopam - PC3	0.591	1	0.825	---	---	100
1751	adipiodone - PC3	0.59	1	0.824	---	---	100
1752	dexibuprofen - HL60	-0.68	1	-0.823	---	---	100
1753	proadifen - PC3	0.59	1	0.823	---	---	100
1754	tranylcypromine - HL60	-0.68	1	-0.823	---	---	100
1755	ipratropium bromide - MCF7	-0.679	1	-0.823	---	---	100
1756	physostigmine - HL60	-0.679	1	-0.822	---	---	100
1757	quinisocaine - PC3	-0.678	1	-0.822	---	---	100
1758	isoflupredone - HL60	0.588	1	0.822	---	---	100
1759	florfenicol - PC3	0.587	1	0.822	---	---	100
1760	noscapine - HL60	-0.678	1	-0.821	---	---	100
1761	apomorphine - HL60	0.584	1	0.82	---	---	100
1762	benperidol - PC3	-0.677	1	-0.82	---	---	100
1763	valproic acid - ssMCF7	0.584	1	0.82	---	---	100
1764	canadine - HL60	0.583	1	0.82	---	---	100
1765	furaltadone - HL60	-0.677	1	-0.82	---	---	100
1766	pentamidine - PC3	0.583	1	0.819	---	---	100
1767	laudanosine - PC3	-0.676	1	-0.819	---	---	100
1768	methoxsalen - PC3	-0.675	1	-0.818	---	---	100
1769	pivmecillinam - HL60	0.58	1	0.818	---	---	100
1770	ketotifen - HL60	-0.675	1	-0.818	---	---	100
1771	denatonium benzoate - PC3	0.58	1	0.817	---	---	100
1772	flurbiprofen - PC3	0.579	1	0.817	---	---	100
1773	procarbazine - HL60	0.578	1	0.816	---	---	100
1774	amantadine - PC3	0.578	1	0.816	---	---	100
1775	levopropoxyphene - PC3	-0.674	1	-0.816	---	---	100
1776	cefixime - HL60	0.577	1	0.816	---	---	100
1777	cisapride - PC3	-0.673	1	-0.815	---	---	100
1778	artemisinin - PC3	-0.673	1	-0.815	---	---	100
1779	cetirizine - PC3	0.574	1	0.815	---	---	100
1780	Prestwick-682 - PC3	-0.673	1	-0.815	---	---	100
1781	alfadolone - HL60	0.574	1	0.814	---	---	100
1782	reserpine - MCF7	-0.672	1	-0.814	---	---	100
1783	buflomedil - PC3	0.573	1	0.814	---	---	100
1784	proadifen - HL60	0.572	1	0.813	---	---	100
1785	thiostrepton - PC3	-0.672	1	-0.813	---	---	100
1786	mefenamic acid - HL60	-0.672	1	-0.813	---	---	100
1787	betahistine - PC3	-0.672	1	-0.813	---	---	100
1788	sulfametoxydiazine - HL60	0.57	1	0.813	---	---	100
1789	repaglinide - PC3	0.569	1	0.812	---	---	100
1790	maprotiline - PC3	-0.67	1	-0.812	---	---	100
1791	abamectin - PC3	-0.67	1	-0.812	---	---	100
1792	Prestwick-642 - PC3	0.567	1	0.812	---	---	100
1793	menadione - HL60	-0.67	1	-0.812	---	---	100
1794	fludrocortisone - HL60	0.567	1	0.811	---	---	100
1795	nilutamide - PC3	-0.67	1	-0.811	---	---	100
1796	benzbromarone - MCF7	0.567	1	0.811	---	---	100
1797	bethanechol - PC3	0.564	1	0.81	---	---	100
1798	nifuroxazide - PC3	-0.668	1	-0.81	---	---	100
1799	hydrastine hydrochloride - PC3	-0.668	1	-0.81	---	---	100
1800	ribavirin - PC3	0.563	1	0.81	---	---	100
1801	alverine - HL60	-0.668	1	-0.81	---	---	100
1802	sparteine - HL60	-0.668	1	-0.809	---	---	100
1803	cinchonine - HL60	-0.667	1	-0.809	---	---	100
1804	progesterone - PC3	-0.667	1	-0.809	---	---	100
1805	netilmicin - PC3	0.56	1	0.809	---	---	100
1806	Prestwick-642 - HL60	-0.667	1	-0.809	---	---	100
1807	ampicillin - PC3	-0.667	1	-0.808	---	---	100
1808	ampyrone - HL60	0.558	1	0.808	---	---	100
1809	tobramycin - HL60	-0.667	1	-0.808	---	---	100
1810	calcium pantothenate - HL60	0.556	1	0.808	---	---	100
1811	kaempferol - HL60	-0.667	1	-0.808	---	---	100
1812	Prestwick-1083 - MCF7	0.554	1	0.807	---	---	100
1813	isosorbide - PC3	0.554	1	0.807	---	---	100
1814	acetohexamide - PC3	-0.666	1	-0.807	---	---	100
1815	ethambutol - HL60	0.553	1	0.807	---	---	100
1816	diphemanil metilsulfate - HL60	0.553	1	0.807	---	---	100
1817	aminocaproic acid - MCF7	-0.665	1	-0.806	---	---	100
1818	hexetidine - PC3	0.553	1	0.806	---	---	100
1819	fendiline - HL60	-0.665	1	-0.806	---	---	100
1820	isoetarine - HL60	0.552	1	0.806	---	---	100
1821	laudanosine - HL60	-0.665	1	-0.806	---	---	100
1822	yohimbic acid - MCF7	0.552	1	0.806	---	---	100
1823	amitriptyline - HL60	0.551	1	0.806	---	---	100
1824	mimosine - PC3	-0.665	1	-0.806	---	---	100
1825	methacholine chloride - PC3	0.551	1	0.805	---	---	100
1826	hexylcaine - HL60	0.55	1	0.805	---	---	100
1827	meclocycline - HL60	0.549	1	0.805	---	---	100
1828	colchicine - HL60	-0.663	1	-0.804	---	---	100
1829	racecadotril - PC3	-0.663	1	-0.804	---	---	100
1830	brompheniramine - PC3	0.548	1	0.804	---	---	100
1831	cinchonidine - HL60	-0.663	1	-0.804	---	---	100
1832	velnacrine - PC3	-0.663	1	-0.803	---	---	100
1833	thioguanosine - HL60	0.547	1	0.803	---	---	100
1834	lisuride - HL60	0.545	1	0.802	---	---	100
1835	terconazole - HL60	-0.661	1	-0.802	---	---	100
1836	verapamil - HL60	0.543	1	0.802	---	---	100
1837	clioquinol - PC3	-0.661	1	-0.802	---	---	100
1838	alprostadil - HL60	0.542	1	0.801	---	---	100
1839	anisomycin - HL60	0.542	1	0.801	---	---	100
1840	16,16-dimethylprostaglandin E2 - MCF7	0.542	1	0.801	---	---	100
1841	adrenosterone - HL60	0.542	1	0.801	---	---	100
1842	metanephrine - HL60	0.541	1	0.801	---	---	100
1843	Prestwick-860 - PC3	0.541	1	0.801	---	---	100
1844	sulfadiazine - HL60	0.541	1	0.8	---	---	100
1845	guanethidine - PC3	-0.66	1	-0.8	---	---	100
1846	clidinium bromide - PC3	0.54	1	0.8	---	---	100
1847	tremorine - PC3	0.539	1	0.799	---	---	100
1848	cefsulodin - HL60	-0.659	1	-0.799	---	---	100
1849	conessine - PC3	0.538	1	0.799	---	---	100
1850	mesoridazine - PC3	-0.659	1	-0.799	---	---	100
1851	propidium iodide - HL60	-0.659	1	-0.798	---	---	100
1852	prilocaine - HL60	0.537	1	0.798	---	---	100
1853	amrinone - HL60	0.537	1	0.798	---	---	100
1854	tiaprofenic acid - PC3	-0.659	1	-0.798	---	---	100
1855	Prestwick-967 - PC3	0.536	1	0.798	---	---	100
1856	thalidomide - HL60	-0.659	1	-0.798	---	---	100
1857	indapamide - HL60	0.534	1	0.798	---	---	100
1858	phthalylsulfathiazole - PC3	-0.658	1	-0.797	---	---	100
1859	clomipramine - HL60	-0.658	1	-0.797	---	---	100
1860	tacrine - HL60	0.533	1	0.797	---	---	100
1861	xamoterol - HL60	-0.658	1	-0.797	---	---	100
1862	N-acetylmuramic acid - HL60	0.533	1	0.796	---	---	100
1863	azathioprine - HL60	0.531	1	0.796	---	---	100
1864	SR-95531 - HL60	0.53	1	0.795	---	---	100
1865	oxymetazoline - HL60	-0.657	1	-0.795	---	---	100
1866	idazoxan - PC3	-0.657	1	-0.795	---	---	100
1867	zardaverine - PC3	0.528	1	0.795	---	---	100
1868	ambroxol - PC3	-0.656	1	-0.794	---	---	100
1869	josamycin - HL60	0.527	1	0.794	---	---	100
1870	enilconazole - PC3	-0.656	1	-0.794	---	---	100
1871	perphenazine - HL60	0.525	1	0.794	---	---	100
1872	pargyline - PC3	-0.655	1	-0.794	---	---	100
1873	propofol - PC3	-0.655	1	-0.793	---	---	100
1874	troleandomycin - HL60	0.524	1	0.793	---	---	100
1875	cloxacillin - PC3	0.524	1	0.793	---	---	100
1876	diflorasone - HL60	-0.655	1	-0.793	---	---	100
1877	naphazoline - HL60	0.524	1	0.793	---	---	100
1878	disopyramide - HL60	0.523	1	0.792	---	---	100
1879	phenindione - PC3	-0.655	1	-0.792	---	---	100
1880	amiodarone - HL60	-0.655	1	-0.792	---	---	100
1881	tyrphostin AG-1478 - MCF7	0.522	1	0.792	---	---	100
1882	dexpanthenol - HL60	0.521	1	0.792	---	---	100
1883	Prestwick-1103 - PC3	0.521	1	0.792	---	---	100
1884	Prestwick-1103 - HL60	0.516	1	0.791	---	---	100
1885	guanabenz - HL60	0.516	1	0.79	---	---	100
1886	naftidrofuryl - HL60	0.515	1	0.79	---	---	100
1887	chlorogenic acid - PC3	0.513	1	0.79	---	---	100
1888	corticosterone - HL60	0.512	1	0.79	---	---	100
1889	erythromycin - HL60	0.51	1	0.789	---	---	100
1890	nortriptyline - PC3	-0.652	1	-0.789	---	---	100
1891	cefazolin - HL60	0.509	1	0.789	---	---	100
1892	rifampicin - PC3	0.507	1	0.788	---	---	100
1893	lorglumide - PC3	-0.651	1	-0.788	---	---	100
1894	tetrahydroalstonine - PC3	0.507	1	0.788	---	---	100
1895	chlorcyclizine - HL60	0.505	1	0.788	---	---	100
1896	nimesulide - HL60	-0.651	1	-0.788	---	---	100
1897	clindamycin - HL60	0.504	1	0.788	---	---	100
1898	lasalocid - PC3	0.5	1	0.787	---	---	100
1899	yohimbic acid - HL60	-0.65	1	-0.787	---	---	100
1900	mevalolactone - PC3	0.498	1	0.786	---	---	100
1901	dydrogesterone - HL60	-0.649	1	-0.786	---	---	100
1902	dimethyloxalylglycine - PC3	-0.649	1	-0.786	---	---	100
1903	terconazole - PC3	0.496	1	0.786	---	---	100
1904	tetrandrine - HL60	0.496	1	0.785	---	---	100
1905	buspirone - HL60	0.495	1	0.785	---	---	100
1906	methylergometrine - PC3	-0.649	1	-0.785	---	---	100
1907	mefloquine - HL60	-0.649	1	-0.785	---	---	100
1908	sulfaquinoxaline - HL60	0.493	1	0.785	---	---	100
1909	cefotetan - HL60	0.493	1	0.785	---	---	100
1910	phenazone - PC3	-0.649	1	-0.785	---	---	100
1911	citiolone - HL60	0.491	1	0.784	---	---	100
1912	cinchocaine - HL60	0.488	1	0.784	---	---	100
1913	celecoxib - PC3	0.487	1	0.784	---	---	100
1914	mebhydrolin - PC3	0.486	1	0.783	---	---	100
1915	ethionamide - PC3	0.484	1	0.783	---	---	100
1916	naftidrofuryl - PC3	0.479	1	0.783	---	---	100
1917	pirinixic acid - SKMEL5	-0.647	1	-0.782	---	---	100
1918	canavanine - HL60	-0.646	1	-0.782	---	---	100
1919	sulmazole - MCF7	0.468	1	0.782	---	---	100
1920	bambuterol - HL60	-0.646	1	-0.781	---	---	100
1921	chlorprothixene - HL60	0.456	1	0.781	---	---	100
1922	sulfamethoxypyridazine - PC3	-0.646	1	-0.781	---	---	100
1923	mevalolactone - HL60	0	1	0.781	---	---	0
1924	pepstatin - PC3	-0.645	1	-0.781	---	---	100
1925	clomipramine - PC3	-0.645	1	-0.78	---	---	100
1926	riluzole - HL60	0	1	0.78	---	---	0
1927	prazosin - HL60	0	1	0.78	---	---	0
1928	etamsylate - HL60	0	1	0.78	---	---	0
1929	butyl hydroxybenzoate - HL60	0	1	0.78	---	---	0
1930	procyclidine - PC3	-0.644	1	-0.78	---	---	100
1931	Prestwick-1084 - HL60	0	1	0.78	---	---	0
1932	streptomycin - PC3	-0.644	1	-0.78	---	---	100
1933	Prestwick-984 - PC3	-0.644	1	-0.78	---	---	100
1934	estropipate - HL60	0	1	0.78	---	---	0
1935	talampicillin - HL60	0	1	0.779	---	---	0
1936	mercaptopurine - PC3	0	1	0.779	---	---	0
1937	proxymetacaine - HL60	0	1	0.779	---	---	0
1938	conessine - HL60	0	1	0.779	---	---	0
1939	propylthiouracil - HL60	0	1	0.779	---	---	0
1940	flunixin - HL60	-0.643	1	-0.779	---	---	100
1941	midodrine - HL60	0	1	0.779	---	---	0
1942	niflumic acid - HL60	0	1	0.778	---	---	0
1943	betulinic acid - HL60	-0.643	1	-0.778	---	---	100
1944	acenocoumarol - HL60	0	1	0.778	---	---	0
1945	suxibuzone - HL60	0	1	0.778	---	---	0
1946	indometacin - HL60	0	1	0.778	---	---	0
1947	1,4-chrysenequinone - HL60	-0.643	1	-0.777	---	---	100
1948	Prestwick-664 - HL60	0	1	0.777	---	---	0
1949	etilefrine - PC3	0	1	0.777	---	---	0
1950	methylergometrine - HL60	0	1	0.777	---	---	0
1951	flutamide - HL60	0	1	0.777	---	---	0
1952	propoxycaine - HL60	0	1	0.777	---	---	0
1953	desoxycortone - HL60	0	1	0.776	---	---	0
1954	kinetin - HL60	0	1	0.776	---	---	0
1955	nipecotic acid - PC3	-0.642	1	-0.776	---	---	100
1956	pirenzepine - HL60	0	1	0.776	---	---	0
1957	cephaeline - PC3	-0.641	1	-0.775	---	---	100
1958	bephenium hydroxynaphthoate - HL60	0	1	0.775	---	---	0
1959	zomepirac - HL60	0	1	0.775	---	---	0
1960	aminohippuric acid - HL60	0	1	0.775	---	---	0
1961	ipratropium bromide - HL60	0	1	0.774	---	---	0
1962	methyldopa - HL60	0	1	0.774	---	---	0
1963	sodium phenylbutyrate - SKMEL5	-0.64	1	-0.774	---	---	100
1964	scopolamine N-oxide - HL60	0	1	0.774	---	---	0
1965	ambroxol - HL60	0	1	0.774	---	---	0
1966	tyloxapol - HL60	-0.64	1	-0.774	---	---	100
1967	salbutamol - PC3	0	2	0.774	---	---	0
1968	fenoterol - PC3	0	1	0.774	---	---	0
1969	Prestwick-665 - HL60	0	1	0.773	---	---	0
1970	kawain - HL60	-0.64	1	-0.773	---	---	100
1971	cyclobenzaprine - PC3	-0.64	1	-0.773	---	---	100
1972	pancuronium bromide - HL60	0	1	0.773	---	---	0
1973	cefalotin - HL60	0	1	0.773	---	---	0
1974	chrysin - HL60	0	1	0.773	---	---	0
1975	gemfibrozil - HL60	0	1	0.772	---	---	0
1976	ritodrine - PC3	0	1	0.772	---	---	0
1977	fluorocurarine - HL60	0	1	0.772	---	---	0
1978	fluspirilene - HL60	0	1	0.771	---	---	0
1979	tubocurarine chloride - PC3	-0.639	1	-0.771	---	---	100
1980	brinzolamide - PC3	-0.638	1	-0.771	---	---	100
1981	econazole - HL60	0	1	0.771	---	---	0
1982	pramocaine - HL60	0	1	0.771	---	---	0
1983	selegiline - PC3	-0.638	1	-0.77	---	---	100
1984	chlorhexidine - HL60	0	1	0.77	---	---	0
1985	roxarsone - PC3	-0.638	1	-0.77	---	---	100
1986	pipemidic acid - HL60	0	1	0.77	---	---	0
1987	amoxicillin - HL60	0	1	0.77	---	---	0
1988	dacarbazine - HL60	-0.637	1	-0.769	---	---	100
1989	sulfapyridine - HL60	0	1	0.769	---	---	0
1990	butirosin - HL60	0	1	0.769	---	---	0
1991	skimmianine - PC3	-0.637	1	-0.769	---	---	100
1992	leflunomide - HL60	0	1	0.769	---	---	0
1993	topiramate - MCF7	-0.637	1	-0.769	---	---	100
1994	hyoscyamine - HL60	-0.637	1	-0.769	---	---	100
1995	enalapril - HL60	0	1	0.769	---	---	0
1996	estrone - PC3	-0.637	1	-0.768	---	---	100
1997	piracetam - PC3	-0.637	1	-0.768	---	---	100
1998	arcaine - HL60	-0.637	1	-0.768	---	---	100
1999	lorglumide - HL60	0	1	0.768	---	---	0
[truncated: 1,588 more rows]

## Sheet: by atc code
rank	atc code	mean	n	enrichment	p	specificity	percent non-null
1	J05AB	0.259	23	0.399	0.0007	0	52
2	S01AD	0.263	23	0.399	0.0007	0	52
3	D06BB	0.363	15	0.459	0.00194	0.1016	60
4	P01CX	0.687	4	0.804	0.00277	0	100
5	R05CA	-0.494	10	-0.514	0.00544	0.0758	80
6	L01CA	0.696	3	0.841	0.00787	0.0387	100
7	H02AA	0.201	12	0.444	0.01106	0.0405	58
8	J02AX	-0.716	4	-0.704	0.01585	0.0173	100
9	A08AB	-0.458	5	-0.636	0.01646	0.0058	80
10	P01CC	-0.341	8	-0.517	0.01673	0.0368	62
11	N05AC	-0.282	24	-0.3	0.02116	0.3404	54
12	N03AC	-0.459	4	-0.683	0.02218	0.0238	75
13	G03XA	0.358	4	0.664	0.02875	0.0242	75
14	G03BA	0.378	5	0.584	0.03861	0.0382	80
15	D08AF	-0.347	4	-0.642	0.03945	0.0629	50
16	B02AA	-0.344	8	-0.469	0.03975	0.1012	62
17	P02CA	-0.377	16	-0.334	0.04211	0.2	62
18	V03AF	0.345	5	0.543	0.06685	0.3315	60
19	A03AB	0.208	13	0.346	0.06691	0.065	53
20	C02DG	0.341	4	0.593	0.07177	0.0153	50
21	C02KC	-0.514	4	-0.592	0.07418	0.2	75
22	R05DA	-0.321	8	-0.429	0.07534	0.0688	75
23	C01CX	-0.399	3	-0.649	0.08671	0.1575	66
24	D03AX	0.286	8	0.417	0.08856	0.0776	62
25	S01AB	-0.32	13	-0.319	0.11261	0.2714	53
26	C03DA	0.261	5	0.499	0.11481	0.1887	60
27	J01CF	0.232	12	0.324	0.12822	0.2237	50
28	A11HA	0.152	11	0.338	0.12849	0.1525	54
29	G03DA	-0.328	4	-0.535	0.13571	0.1477	75
30	C01BG	0.368	4	0.53	0.13875	0.1367	50
31	J01CE	0.233	12	0.319	0.13925	0.2927	50
32	M03BX	-0.293	22	-0.239	0.13928	0.1619	54
33	D08AH	-0.405	5	-0.479	0.1402	0.157	60
34	G01AC	-0.405	5	-0.479	0.1402	0.157	60
35	P01AA	-0.405	5	-0.479	0.1402	0.157	60
36	A03AD	-0.353	4	-0.528	0.14418	0.1384	50
37	M05BA	-0.281	4	-0.525	0.14802	0.2289	50
38	L01AX	-0.524	4	-0.52	0.15592	0.2746	75
39	G01AG	-0.389	4	-0.515	0.16306	0.1628	75
40	J01GA	-0.511	4	-0.506	0.17571	0.2606	75
41	A05BA	-0.26	6	-0.42	0.17961	0.2778	66
42	P02CE	-0.333	4	-0.498	0.18767	0.4124	50
43	V03AC	-0.265	8	-0.361	0.1937	0.3742	50
44	P01BC	-0.373	5	-0.448	0.19648	0.4444	60
45	A04AA	0.302	4	0.481	0.2157	0.3911	50
46	A02BC	-0.269	8	-0.352	0.21769	0.3632	62
47	B03BA	0.203	4	0.479	0.21978	0.1417	50
48	P02DA	-0.44	5	-0.435	0.22511	0.405	60
49	C02KD	-0.567	4	-0.474	0.23543	0.2742	75
50	R03AB	-0.214	4	-0.473	0.23858	0.2	50
51	R03CB	-0.214	4	-0.473	0.23858	0.2	50
52	C02AA	-0.32	6	-0.384	0.26586	0.4135	66
53	N05BE	0.318	4	0.457	0.26911	0.1554	50
54	N05CE	0.267	4	0.456	0.27076	0.4647	50
55	J04AC	0.236	5	0.412	0.27954	0.5298	60
56	A04AD	0.184	4	0.447	0.29225	0.3818	50
57	N05CM	0.184	4	0.447	0.29225	0.3818	50
58	C02BB	0.152	3	0.511	0.30613	0.2791	66
59	J01XD	-0.264	16	-0.231	0.31206	0.4444	50
60	P01AB	-0.264	16	-0.231	0.31206	0.4444	50
61	P01AX	-0.379	9	-0.301	0.32242	0.6561	55
62	A07AX	-0.481	4	-0.438	0.32326	0.383	75
63	M09AA	-0.046	4	-0.429	0.34638	0.3972	50
64	L01XB	0.483	3	0.483	0.37215	0.367	66
65	P01BE	-0.496	3	-0.481	0.37633	0.4096	66
66	N01BX	-0.322	8	-0.304	0.37705	0.3626	62
67	C01AA	-0.232	10	-0.271	0.3824	0.625	50
68	N03AD	-0.269	8	-0.301	0.38631	0.5578	50
69	J01XC	-0.349	4	-0.412	0.39603	0.3837	50
70	V04CA	-0.298	7	-0.311	0.42494	0.3697	57
71	P01BX	0.169	3	0.46	0.42979	0.6035	66
72	J01FF	0	8	0.288	0.44105	0.5203	50
73	C08DA	0.226	6	0.327	0.44218	0.3487	50
74	J04AD	0.188	3	0.45	0.45695	0.5132	66
75	B02BA	-0.335	2	-0.514	0.47121	0.5172	50
76	C10AA	-0.282	12	-0.229	0.48118	0.4889	50
77	A01AC	-0.197	16	-0.199	0.48655	0.4654	50
78	C01BD	-0.225	9	-0.261	0.49527	0.5902	55
79	L02AA	-0.251	6	-0.31	0.51343	0.6148	50
80	N07AA	0.146	4	0.374	0.51485	0.4565	50
81	N03AF	-0.164	8	-0.268	0.53029	0.6364	50
82	N04BB	-0.194	4	-0.368	0.53997	0.6928	50
83	M01AA	0.212	4	0.364	0.5504	0.7617	50
84	A07EC	-0.226	10	-0.235	0.5612	0.5505	50
85	G03XB	-0.157	4	-0.356	0.58356	0.5633	50
86	J01XA	0.325	4	0.349	0.60194	0.7964	50
87	A14AA	-0.162	4	-0.345	0.62016	0.56	50
88	L01CB	0.144	4	0.342	0.62629	0.841	50
89	B03BB	-0.188	4	-0.337	0.64736	0.7647	50
90	N04BD	-0.343	4	-0.333	0.66309	0.6433	50
91	R01BA	-0.315	4	-0.323	0.69375	0.689	50
92	L01XE	-0.172	3	-0.361	0.70601	0.6418	66
93	J01DE	0.147	4	0.318	0.70855	0.7807	50
94	C01EB	-0.271	12	-0.187	0.72754	0.8865	50
95	J01EA	-0.225	5	-0.27	0.77883	0.7115	60
96	G02AB	-0.324	4	-0.282	0.8223	0.8929	50
97	N07BA	-0.183	4	-0.278	0.83413	0.8941	50
98	M03AA	-0.045	2	-0.387	0.85037	0.904	50
99	H03BA	-0.368	4	-0.27	0.8579	0.9583	50
100	J01DH	-0.361	4	-0.265	0.87161	0.8836	50
101	V04CD	-0.314	4	-0.244	0.92381	0.9735	50
102	C04AA	0.318	5	0.658	---	---	40
103	P02CB	0.174	4	0.619	---	---	25
104	C01EA	0.269	7	0.557	---	---	42
105	P03AA	-0.317	5	-0.542	---	---	40
106	C03CC	-0.202	3	-0.528	---	---	33
107	D08AC	0.241	5	0.515	---	---	40
108	R02AA	0.241	5	0.515	---	---	40
109	M02AX	0.156	5	0.491	---	---	20
110	C04AD	0.272	5	0.482	---	---	40
111	M01AC	-0.254	8	-0.467	---	---	37
112	H03BB	-0.276	9	-0.462	---	---	44
113	J01EC	0.192	10	0.442	---	---	40
114	R01AX	0.001	3	0.441	---	---	33
115	R03BB	0.001	3	0.441	---	---	33
116	P01BB	0.177	3	0.437	---	---	33
117	G04CB	0.079	6	0.423	---	---	16
118	C04AC	-0.149	4	0.417	---	---	0
119	C10AD	-0.149	4	0.417	---	---	0
120	C10AX	0.08	10	0.408	---	---	40
121	P02BA	0.225	8	0.407	---	---	37
122	P02BX	-0.18	4	0.407	---	---	0
123	C02DA	-0.137	5	-0.403	---	---	20
124	V03AH	-0.137	5	-0.403	---	---	20
125	N06DX	0.171	4	0.401	---	---	25
126	S02DA	0.169	5	0.396	---	---	20
127	R03BX	0.131	5	0.392	---	---	20
128	R03DX	0.131	5	0.392	---	---	20
129	C05AX	0	4	0.389	---	---	0
130	C05CX	0	4	0.389	---	---	0
131	G03GB	-0.134	4	-0.385	---	---	25
132	N02BG	0.069	9	0.384	---	---	33
133	A07EB	0	2	0.381	---	---	0
134	R03BC	0	2	0.381	---	---	0
135	N07XX	0.064	5	0.381	---	---	40
136	S01LA	-0.284	3	-0.373	---	---	33
137	J05AX	0.046	5	0.373	---	---	40
138	A05AX	0	4	0.369	---	---	0
139	C02DB	0.007	6	0.368	---	---	16
140	A06AB	-0.179	4	-0.367	---	---	25
141	A06AG	-0.179	4	-0.367	---	---	25
142	N05AE	0	4	0.367	---	---	0
143	A07XA	-0.166	4	-0.365	---	---	25
144	L01BB	0	3	0.364	---	---	0
145	N05CH	0.193	4	0.363	---	---	25
146	D07AA	0.185	12	0.361	---	---	41
147	N07AX	0.191	4	0.358	---	---	25
148	C08EX	-0.092	7	-0.354	---	---	14
149	G02CA	0.012	7	0.344	---	---	28
150	D07XA	0.105	8	0.34	---	---	37
151	G01AX	0.014	8	0.338	---	---	12
152	H03AA	0.05	8	0.337	---	---	25
153	N05AL	-0.052	14	0.335	---	---	14
154	L01AA	0	7	0.331	---	---	14
155	G02CB	0.09	14	0.321	---	---	35
156	L02AB	-0.133	4	0.32	---	---	0
157	D06BX	0.09	5	0.32	---	---	40
158	A10BX	0.008	4	0.319	---	---	25
159	S01EX	0.01	3	0.316	---	---	33
160	A05AA	0.109	7	0.315	---	---	28
161	D07AD	0.02	8	0.314	---	---	25
162	N02BE	-0.105	8	0.312	---	---	0
163	N03AA	-0.007	4	-0.307	---	---	25
164	G02CC	0.196	13	0.306	---	---	38
165	J01XB	-0.002	4	-0.306	---	---	25
166	N03AB	-0.008	10	0.306	---	---	30
167	G03DC	0.166	19	0.306	---	---	42
168	G04BX	0.006	4	0.304	---	---	25
169	J05AE	0.026	4	0.304	---	---	25
170	N07AB	-0.224	8	-0.304	---	---	37
171	J05AF	0.016	8	0.301	---	---	12
172	C03CA	0.166	16	0.3	---	---	43
173	D01AA	-0.001	12	0.3	---	---	8
174	J01XX	-0.194	4	-0.298	---	---	25
175	V04CG	-0.002	5	0.298	---	---	40
176	N04BA	-0.303	5	-0.297	---	---	40
177	N05AX	0.019	3	0.294	---	---	33
178	C09AA	0.174	16	0.293	---	---	37
179	R01AC	0.216	12	0.292	---	---	41
180	C01CE	0.142	13	0.289	---	---	30
181	V08AB	0.14	26	0.288	---	---	42
182	M03BA	-0.029	7	0.286	---	---	14
183	N03AG	0.097	60	0.286	---	---	36
184	D01BA	-0.121	5	-0.286	---	---	20
185	N06AB	-0.265	21	-0.285	---	---	47
186	L04AD	0.177	9	0.285	---	---	44
187	C01BB	0.138	15	0.281	---	---	26
188	A16AX	0.202	7	0.28	---	---	42
189	N02CX	-0.173	8	-0.279	---	---	25
190	L02BG	0.015	5	0.279	---	---	20
191	P01AC	-0.019	4	0.278	---	---	25
192	C01AB	0.045	3	0.277	---	---	33
193	V04CH	-0.022	4	0.275	---	---	25
194	A02BX	-0.003	14	0.273	---	---	7
195	N02AF	-0.135	5	0.273	---	---	20
196	C01CA	0.134	35	0.272	---	---	37
197	J01DF	0.005	5	0.27	---	---	20
198	A02BA	0.124	19	0.269	---	---	31
199	D07XC	-0.194	7	-0.269	---	---	42
200	A11CC	-0.12	8	0.268	---	---	12
201	P02BB	0.144	5	0.267	---	---	40
202	D10BA	-0.172	4	0.266	---	---	0
203	M04AB	0.163	11	0.265	---	---	45
204	G03XC	0.126	7	0.265	---	---	28
205	C03BD	0.039	4	0.264	---	---	25
206	B05CA	-0.135	18	-0.262	---	---	38
207	N05AF	0.081	12	0.261	---	---	33
208	L01BA	-0.176	8	-0.261	---	---	25
209	P02CX	-0.08	6	0.26	---	---	16
210	P01BD	-0.016	5	0.26	---	---	20
211	R06AA	0.15	23	0.256	---	---	34
212	R03AC	0.008	21	0.255	---	---	28
213	R03DA	0.001	21	0.253	---	---	9
214	A01AD	0.057	17	0.251	---	---	29
215	N02CA	0.077	10	0.251	---	---	40
216	M01AX	0.044	19	0.251	---	---	15
217	M01AH	0.001	14	0.25	---	---	21
218	S01XA	0.054	8	0.249	---	---	37
219	G01AD	-0.014	4	0.248	---	---	25
220	C08DB	-0.046	5	0.248	---	---	40
221	G04BD	0.085	8	0.247	---	---	25
222	C07AG	-0.01	4	-0.246	---	---	25
223	B01AA	0.027	15	0.245	---	---	40
224	M03CA	0.08	6	0.245	---	---	33
225	A07EA	-0.079	23	0.244	---	---	21
226	B02BX	-0.171	4	0.243	---	---	0
227	C04AB	-0.047	12	0.241	---	---	8
228	P01BA	-0.157	12	-0.239	---	---	41
229	C01BC	0.035	10	0.239	---	---	40
230	A07AC	0.014	5	0.239	---	---	20
231	S01GX	0.156	12	0.238	---	---	41
232	C08EA	-0.206	7	-0.237	---	---	42
233	J04BA	0.109	10	0.236	---	---	40
234	N04BC	-0.051	18	0.236	---	---	16
235	S01EB	-0.154	16	-0.235	---	---	37
236	J01FA	0.059	37	0.232	---	---	29
237	N06DA	-0.11	8	0.231	---	---	25
238	G03CB	-0.158	9	-0.23	---	---	44
239	S03BA	-0.07	16	0.228	---	---	31
240	C01DX	-0.093	21	-0.227	---	---	33
241	J01BA	0.013	9	0.226	---	---	22
242	R05CB	-0.164	4	-0.226	---	---	25
243	J04AB	-0.174	11	-0.225	---	---	45
244	P02CF	-0.138	5	-0.224	---	---	40
245	A03AA	-0.054	12	0.224	---	---	25
246	A03FA	0.028	24	0.224	---	---	29
247	C02AC	-0.095	16	0.223	---	---	6
248	N07BB	-0.013	10	-0.222	---	---	20
249	G03HA	-0.108	4	0.221	---	---	25
250	G02AD	-0.185	8	-0.221	---	---	37
251	C04AE	0.008	9	0.221	---	---	22
252	L01CD	-0.009	6	0.219	---	---	33
253	D10AF	-0.032	18	0.218	---	---	33
254	S01EA	0.018	8	0.217	---	---	25
255	P02CC	-0.065	9	0.217	---	---	33
256	N05AG	-0.093	8	0.215	---	---	12
257	C02CA	-0.167	14	-0.214	---	---	35
258	J01DB	0.04	22	0.214	---	---	31
259	S01BC	-0.202	30	-0.214	---	---	46
260	D06BA	-0.178	23	-0.213	---	---	39
261	A11DA	-0.138	8	0.21	---	---	12
262	R03CC	0.013	25	0.209	---	---	28
263	N01AX	-0.167	14	-0.209	---	---	28
264	A10BB	-0.254	41	-0.209	---	---	46
265	D06AA	-0.176	19	-0.207	---	---	36
266	S01EC	-0.187	20	-0.206	---	---	40
267	D01AC	-0.151	35	-0.202	---	---	42
268	S01GA	0.024	20	0.202	---	---	25
269	D05AD	-0.065	7	-0.202	---	---	28
270	D05BA	-0.065	7	-0.202	---	---	28
271	R02AB	0.001	8	0.201	---	---	25
272	A03BA	-0.103	9	-0.201	---	---	22
273	M03BB	0.096	8	0.201	---	---	37
274	A03AX	-0.073	8	0.2	---	---	12
275	C02CC	0.029	7	0.2	---	---	28
276	J01DC	0.053	35	0.199	---	---	25
277	N06AF	-0.187	25	-0.198	---	---	44
278	C02DC	-0.006	5	-0.196	---	---	20
279	N05BB	-0.117	5	-0.196	---	---	40
280	A01AB	0.032	53	0.196	---	---	26
281	L01AD	-0.014	15	0.196	---	---	20
282	J02AB	0.074	9	0.192	---	---	33
283	C04AX	0.002	37	0.192	---	---	24
284	S02BA	-0.054	19	0.192	---	---	31
285	J01CA	0.031	41	0.191	---	---	26
286	V03AB	-0.058	18	-0.191	---	---	33
287	L01DB	-0.124	10	0.19	---	---	10
288	D09AA	-0.2	18	-0.19	---	---	38
289	R06AD	0.01	12	0.19	---	---	16
290	A10BA	0.056	17	0.188	---	---	29
291	S01CB	0.017	23	0.188	---	---	34
292	D11AX	-0.007	29	0.187	---	---	17
293	N07CA	-0.128	12	-0.187	---	---	25
294	J01MB	-0.083	25	0.182	---	---	12
295	A07DA	-0.075	6	-0.181	---	---	33
296	C07AB	-0.08	21	0.18	---	---	14
297	R07AB	-0.072	12	0.177	---	---	33
298	D10AA	0.05	16	0.175	---	---	37
299	R02AD	0.001	13	0.174	---	---	23
300	L02BB	-0.151	9	-0.173	---	---	33
301	N03AX	-0.156	5	-0.171	---	---	40
302	G04CA	-0.067	9	0.169	---	---	11
303	J01MA	-0.197	25	0.168	---	---	12
304	V08AC	-0.009	12	0.168	---	---	33
305	D07AC	-0.032	35	0.167	---	---	20
306	C05AA	0.04	28	0.166	---	---	32
307	M04AC	-0.099	6	0.166	---	---	16
308	H02AB	-0.05	40	0.166	---	---	27
309	C08CA	-0.065	31	0.164	---	---	22
310	R01AA	-0.096	16	0.164	---	---	12
311	R01AB	-0.096	16	0.164	---	---	12
312	R06AB	0.003	13	0.163	---	---	30
313	N04AA	-0.063	20	0.163	---	---	15
314	R06AC	-0.055	12	-0.161	---	---	25
315	J04AK	-0.14	9	0.161	---	---	22
316	C03DB	-0.138	10	-0.16	---	---	40
317	J01XE	-0.132	5	0.159	---	---	20
318	R06AE	-0.183	19	-0.158	---	---	47
319	G03AC	-0.065	19	0.158	---	---	21
320	C10AB	-0.209	18	-0.157	---	---	44
321	N06BX	0.011	17	0.156	---	---	23
322	G01AA	-0.177	19	-0.155	---	---	36
323	C03BA	0.044	28	0.155	---	---	35
324	L04AX	-0.118	22	0.154	---	---	22
325	N06AX	-0.199	18	-0.154	---	---	44
326	M01AB	-0.146	49	0.153	---	---	10
327	S01ED	0.008	16	0.153	---	---	25
328	J01ED	-0.126	23	-0.152	---	---	34
329	S01AX	-0.133	30	0.152	---	---	16
330	C07AA	0.075	36	0.152	---	---	27
331	G03DB	-0.194	11	-0.15	---	---	45
332	S01HA	-0.141	26	-0.149	---	---	38
333	M01AG	-0.113	20	-0.149	---	---	30
334	R06AX	-0.072	36	-0.146	---	---	33
335	D06AX	-0.142	24	-0.146	---	---	29
336	N01BA	-0.042	12	0.143	---	---	25
337	S03AA	-0.047	28	0.138	---	---	21
338	N05AA	-0.16	37	-0.136	---	---	37
339	A07AB	-0.145	14	-0.136	---	---	42
340	N01BB	-0.041	23	0.135	---	---	21
341	J01GB	-0.029	33	0.135	---	---	24
342	J01EB	-0.106	28	0.134	---	---	17
343	J01DD	-0.023	22	0.134	---	---	31
344	R05DB	0.018	23	0.132	---	---	21
345	S01BA	-0.056	45	0.132	---	---	24
346	D10AD	-0.202	26	0.132	---	---	11
347	G01AF	-0.062	37	0.131	---	---	24
348	L04AA	-0.183	51	-0.131	---	---	41
349	N02BA	-0.023	18	0.129	---	---	27
350	R03BA	-0.194	29	-0.129	---	---	41
351	R01AD	-0.164	42	-0.128	---	---	42
352	M02AA	-0.061	83	0.127	---	---	20
353	D07XB	-0.087	23	0.125	---	---	21
354	D07AB	-0.074	27	0.124	---	---	18
355	C01BA	-0.086	18	-0.123	---	---	38
356	D04AA	0.012	20	0.123	---	---	25
357	C05AD	-0.027	32	0.122	---	---	21
358	L01XX	-0.076	34	0.121	---	---	17
359	N05AB	-0.175	60	-0.119	---	---	40
360	J01AA	-0.076	41	0.118	---	---	19
361	N02BB	-0.11	19	-0.117	---	---	42
362	S01FA	-0.034	23	0.117	---	---	26
363	G03CC	-0.119	17	0.116	---	---	23
364	D01AE	-0.077	21	0.112	---	---	23
365	G04BE	-0.057	28	0.11	---	---	17
366	N06AA	-0.027	46	0.098	---	---	28
367	N05AH	-0.088	21	0.097	---	---	23
368	D04AB	-0.061	30	0.097	---	---	20
369	C03AA	-0.076	24	0.092	---	---	25
370	B01AC	-0.098	35	0.091	---	---	22
371	A07AA	-0.085	32	0.088	---	---	18
372	S02AA	-0.111	42	-0.086	---	---	33
373	L02BA	-0.093	47	-0.083	---	---	38
374	S01AA	-0.071	68	0.081	---	---	19
375	N05AD	-0.062	43	0.079	---	---	25
376	A10BG	-0.084	41	-0.078	---	---	31
377	G03CA	-0.073	45	0.07	---	---	24
378	M01AE	-0.105	54	-0.058	---	---	37

## Sheet: |enrichment>0.5|
37 potential compounds targeting prognostic lipid metabolism-related genes.
rank	cmap name	mean	n	enrichment	p	specificity	percent non-null
1	vorinostat	-0.617	12	-0.617	0	0.2566	83
4	amitriptyline	0.671	6	0.807	8e-05	0.0097	100
5	0297417-0002B	-0.804	3	-0.942	0.00028	0.0164	100
6	Prestwick-559	-0.798	3	-0.937	0.00038	0.0061	100
7	scriptaid	-0.806	3	-0.909	0.00134	0.0417	100
8	MG-262	-0.817	3	-0.907	0.00152	0.0787	100
9	meglumine	0.641	4	0.82	0.00183	0	100
10	suramin sodium	0.687	4	0.804	0.00277	0	100
12	cloxacillin	0.624	4	0.793	0.00362	0.0068	100
13	Prestwick-1103	0.636	4	0.791	0.00372	0.0186	100
14	fludroxycortide	0.56	5	0.722	0.00378	0	80
15	captopril	0.45	5	0.721	0.00384	0	80
16	thiostrepton	-0.681	4	-0.79	0.00398	0.037	100
17	naftidrofuryl	0.584	4	0.783	0.00412	0	100
18	dydrogesterone	-0.727	4	-0.786	0.00418	0	100
19	aciclovir	0.575	6	0.659	0.00465	0.0124	83
20	econazole	0.489	4	0.771	0.00521	0.0718	75
21	Prestwick-1082	0.659	3	0.853	0.00605	0.0263	100
22	kinetin	0.343	4	0.749	0.0076	0	50
23	vinblastine	0.696	3	0.841	0.00787	0.0387	100
24	withaferin A	-0.7	4	-0.746	0.00826	0.1148	100
25	sulconazole	-0.714	4	-0.742	0.00871	0.0197	100
26	atracurium besilate	0.681	3	0.836	0.00889	0.0173	100
27	rotenone	-0.658	4	-0.74	0.00891	0.0284	100
29	mephenytoin	0.553	4	0.733	0.00991	0.0237	75
30	acenocoumarol	0.4	5	0.669	0.01047	0.013	60
31	guaifenesin	-0.583	6	-0.614	0.01059	0.0258	83
32	(+)-isoprenaline	0.548	4	0.729	0.01076	0.0052	75
33	pheneticillin	0.537	4	0.729	0.01082	0.0315	75
34	guanabenz	0.373	5	0.667	0.01089	0.0769	60
35	fludrocortisone	0.379	8	0.536	0.01119	0.1706	75
36	edrophonium chloride	0.475	5	0.664	0.01131	0	60
37	luteolin	-0.681	4	-0.722	0.01211	0.0571	100
38	myosmine	0.465	6	0.6	0.01317	0.0611	66
39	epivincamine	-0.711	4	-0.715	0.01333	0.0402	100
40	estropipate	0.402	4	0.712	0.01396	0.018	50
41	tinidazole	-0.494	6	-0.602	0.01398	0	66
42	minocycline	0.358	5	0.652	0.01416	0.0128	60
43	cefaclor	0.343	4	0.706	0.01556	0.0139	50
44	flucytosine	-0.716	4	-0.704	0.01585	0.0173	100
45	16,16-dimethylprostaglandin E2	0.624	3	0.801	0.016	0.0419	100
46	orlistat	-0.458	5	-0.636	0.01646	0.0058	80
47	metaraminol	0.334	4	0.7	0.01669	0.0075	50
48	0317956-0000	-0.383	8	-0.507	0.0198	0.0961	50
49	etynodiol	0.596	4	0.682	0.02184	0.0559	75
50	trimethadione	-0.459	4	-0.683	0.02218	0.0238	75
51	fenoterol	0.442	3	0.774	0.02332	0.0315	66
52	naringenin	0.548	4	0.678	0.02349	0.1596	75
53	carbachol	-0.589	4	-0.679	0.02371	0.052	75
54	pralidoxime	0.346	4	0.676	0.02421	0.0567	50
55	pyridoxine	-0.571	4	-0.674	0.02532	0.0809	75
56	0225151-0000	-0.713	3	-0.768	0.02574	0.0233	100
57	hydrastinine	0.356	5	0.611	0.02661	0.028	80
58	W-13	0.778	2	0.886	0.027	0.0245	100
59	mycophenolic acid	0.472	3	0.756	0.02854	0.1709	66
60	danazol	0.358	4	0.664	0.02875	0.0242	75
61	gliclazide	-0.503	4	-0.656	0.03219	0.12	75
62	latamoxef	-0.703	3	-0.744	0.03429	0.0345	100
63	aminocaproic acid	-0.633	3	-0.743	0.03441	0.0408	100
64	tacrine	0.281	4	0.652	0.03445	0.0126	50
65	probucol	0.219	6	0.541	0.03593	0.0067	50
66	thiocolchicoside	-0.521	4	-0.647	0.0367	0.0427	75
67	sulfapyridine	0.338	4	0.648	0.0368	0.0201	50
68	testosterone	0.378	5	0.584	0.03861	0.0382	80
69	nitrofural	-0.347	4	-0.642	0.03945	0.0629	50
70	arachidonyltrifluoromethane	0.721	2	0.858	0.04088	0.0377	100
71	TTNPB	0.653	2	0.857	0.04143	0.0311	100
72	tranylcypromine	-0.407	5	-0.575	0.04147	0.12	80
73	PF-00539745-00	0.447	3	0.72	0.04319	0.0565	66
74	tacrolimus	0.421	3	0.718	0.04425	0.0828	66
75	fenbufen	0.211	6	0.524	0.04666	0.0214	50
76	etiocholanolone	0.369	6	0.522	0.04757	0.3228	66
77	adenosine phosphate	0.353	4	0.628	0.04776	0.0373	75
78	bendroflumethiazide	-0.461	6	-0.523	0.04807	0.0862	66
79	nadide	0.536	4	0.626	0.04882	0.0643	75
80	CP-944629	0.337	4	0.625	0.04933	0.0154	50
